# Supplementary material for: A redox-active diborane platform performs C(sp3)–H activation and nucleophilic substitution reactions
Source: PubMed Central journal article supplement (PMC5942040; doi:10.1039/c8sc00743h), 2018-03-19
Supplement: SC-009-C8SC00743H-s001.pdf [file SC-009-C8SC00743H-s001.pdf]

## Electronic Supplementary Information

# A Redox-Active Diborane Platform Performs C(sp<sup>3</sup>)-H Activation and Nucleophilic Substitution Reactions

Thomas Kaese, Timo Trageser, Hendrik Budy, Michael Bolte, Hans-Wolfram Lerner and  
Matthias Wagner\*

### Content:

|    |                                                |             |
|----|------------------------------------------------|-------------|
| 1. | Experimental details and characterization data | ESI2-ESI22  |
| 2. | Plots of NMR spectra                           | ESI23-ESI46 |
| 3. | X-ray                                          | ESI47-ESI59 |
| 4. | Computational details                          | ESI60-ESI69 |
| 5. | References                                     | ESI70       |

## 1. Experimental details and characterization data

**General considerations.** All reactions and manipulations were carried out in an argon-filled glovebox or by applying standard Schlenk techniques under an argon atmosphere. Hexane was dried over Na, THF and Et<sub>2</sub>O were dried over Na/benzophenone, THF-*d*<sub>8</sub> was dried over Na-K alloy. Prior to use, the solvents were distilled from the drying agent, degassed by applying three freeze-pump-thaw cycles, and stored over activated molecular sieves (3 Å). Compounds **1**H<sub>2</sub>,<sup>S1</sup> Li[**1**H],<sup>S2</sup> and Li<sub>2</sub>[**1**]<sup>S3</sup> were synthesized according to literature procedures. The Et<sub>2</sub>O solution of the D<sub>3</sub>CLi·LiI complex (Sigma Aldrich) is commercially available with 99 atom-% deuterium and was used as received. Commercial Et<sub>3</sub>SiD (Santa Cruz Biotechnology) contained 98 atom-% deuterium. Prior to use, the liquid haloalkanes were degassed by applying three freeze-pump-thaw cycles. NMR: Bruker DPX 250, Avance 300, Avance III 500 HD. Chemical shifts are referenced to (residual) solvent signals (<sup>1</sup>H/<sup>13</sup>C{<sup>1</sup>H}; THF-*d*<sub>8</sub>: δ = 3.58/67.21 ppm),<sup>S4</sup> external LiCl in D<sub>2</sub>O (<sup>7</sup>Li), or external BF<sub>3</sub>·Et<sub>2</sub>O (<sup>11</sup>B; <sup>11</sup>B{<sup>1</sup>H}). Abbreviations: s = singlet, d = doublet, t = triplet, q = quartet, m = multiplet, br = broad, n.r. = multiplet expected in the NMR spectrum but not resolved, n.o. = not observed, vq = virtual quartet, vquint = virtual quintet.

**Reaction of 1H<sub>2</sub> with 1 equiv. of H<sub>3</sub>CLi.** An Et<sub>2</sub>O solution of H<sub>3</sub>CLi (0.5 M, 0.05 mL, 25 μmol) was evaporated to dryness in an NMR tube and the colorless solid residue was dissolved in THF-*d*<sub>8</sub> (0.6 mL) at room temperature. The solution was frozen at -196 °C and colorless 1H<sub>2</sub> (14 mg, 25 μmol) was added. The NMR tube was evacuated, flame sealed, and warmed to room temperature. The <sup>1</sup>H NMR spectroscopic investigation of the orange reaction solution revealed Li[1H],<sup>S2</sup> Li[2], and Li[7] as the major products (each ca. 20-40%; the product distribution varied to some extent between repeated experiments).

In a glovebox, a representative NMR sample was transferred to an uncapped glass vial, and the vial was placed in a larger glass vessel containing hexane (2 mL). The outer vessel was covered with a lid to allow for gas-phase diffusion of the solvents in a closed environment. After 2-3 d, three types of single crystals (1 x yellow, 2 x colorless) had grown. According to X-ray crystallography, the yellow crystals consisted of the known salt [Li(thf)<sub>3</sub>][1H].<sup>S2</sup> Of the colorless specimen, the first kind were too poorly diffracting to perform a full refinement, but, according to <sup>1</sup>H NMR spectroscopy, they consisted of Li[7] (cf. the reaction of 1H<sub>2</sub> with Li[HBtEt<sub>3</sub>] for a targeted synthesis and the characterization of Li[7]). The second kind of colorless crystals turned out to be [Li(thf)<sub>4</sub>][2] (for the X-ray crystal structure of the differently solvated analog [Li(thf)<sub>3</sub>][2], see the reaction of Li<sub>2</sub>[1] with methyl triflate).

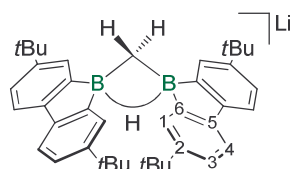

Figure S1. NMR numbering scheme for Li[2].

#### Li[2]

<sup>1</sup>H NMR (500.2 MHz, THF-*d*<sub>8</sub>): δ = 7.99 (d, <sup>4</sup>J(H,H) = 1.9 Hz, 4H; H-1), 7.41 (d, <sup>3</sup>J(H,H) = 7.9 Hz, 4H; H-4), 7.06 (dd, <sup>3</sup>J(H,H) = 7.9 Hz, <sup>4</sup>J(H,H) = 1.9 Hz, 4H; H-3), 1.94 (br, 1H; μ-H), 1.42 (s, 36H; CH<sub>3</sub>), 0.49 (d, <sup>3</sup>J(H,H) = 4.8 Hz, 2H; CH<sub>2</sub>).

<sup>7</sup>Li NMR (194.4 MHz, THF-*d*<sub>8</sub>): δ = -0.3.

<sup>11</sup>B NMR (160.5 MHz, THF-*d*<sub>8</sub>): δ = -14.0 (br).

<sup>13</sup>C{<sup>1</sup>H} NMR (125.8 MHz, THF-*d*<sub>8</sub>): δ = 159.1 (C-6), 147.8 (C-5), 146.3 (C-2), 127.9 (C-1), 121.8 (C-3), 117.7 (C-4), 35.2 (CCH<sub>3</sub>), 32.6 (CH<sub>3</sub>), 5.1 (CH<sub>2</sub>).

**Reaction of Li[2] with H<sub>3</sub>C-I.** An NMR tube was charged at room temperature with [Li(thf)<sub>4</sub>][2] (5.0 mg, 5.8 μmol), THF-*d*<sub>8</sub> (0.5 mL), and H<sub>3</sub>C-I (1.0 μl, 2.3 mg, 16 μmol). According to <sup>1</sup>H, <sup>11</sup>B, and <sup>13</sup>C NMR spectroscopic investigations, Li[2] had vanished after 3 d and **14**<sup>C1</sup> formed as the major product besides trace amounts of **13**.

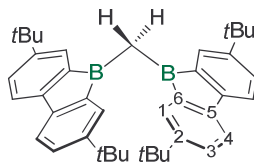

Figure S2. NMR numbering scheme for **14**<sup>C1</sup>.

**14**<sup>C1</sup>

**<sup>1</sup>H NMR (500.2 MHz, THF-*d*<sub>8</sub>):** δ = 7.41 (d, <sup>4</sup>J(H,H) = 1.9 Hz, 4H; H-1), 7.13 (d, <sup>3</sup>J(H,H) = 7.8 Hz, 4H; H-4), 7.07 (dd, <sup>3</sup>J(H,H) = 7.8 Hz, <sup>4</sup>J(H,H) = 1.9 Hz, 4H; H-3), 1.93 (s, 2H; CH<sub>2</sub>), 1.18 (s, 36H; CH<sub>3</sub>).

**<sup>11</sup>B NMR (160.5 MHz, THF-*d*<sub>8</sub>):** δ = 45 (vbr).

**<sup>13</sup>C{<sup>1</sup>H} NMR (125.8 MHz, THF-*d*<sub>8</sub>):** δ = 149.3 (C-5), 149.2 (C-2), 147.8 (C-6), 129.7 (C-1), 127.2 (C-3), 118.4 (C-4), 34.9 (CCH<sub>3</sub>), 31.7 (CH<sub>3</sub>), 14.8 (CH<sub>2</sub>).

**HRMS:** Calculated for C<sub>41</sub>H<sub>50</sub>B<sub>2</sub>: 564.40931, found: 564.41115.

## Reaction of $1\text{H}_2$ with 1 equiv. $\text{Li}[\text{HBEt}_3]$ .

At  $-30^\circ\text{C}$

In an NMR tube, a THF solution of  $\text{Li}[\text{HBEt}_3]$  (1 M, 38  $\mu\text{L}$ , 38  $\mu\text{mol}$ ) was evaporated to dryness at room temperature in a dynamic vacuum. During the addition of a  $\text{THF-}d_8$  solution of  $1\text{H}_2$  (0.5 mL, 21 mg, 38  $\mu\text{mol}$ ) and the subsequent flame-sealing of the NMR tube, the lower part of the tube was cooled to  $-196^\circ\text{C}$ . The sample was stored at  $-70^\circ\text{C}$  for 3 h prior to its NMR spectroscopic investigation at  $-30^\circ\text{C}$ , which showed a selective transformation to the primary hydride trapping product  $\text{Li}[10]$ .

At room temperature

When carried out in neat THF (6 mL) at room temperature, the reaction between  $1\text{H}_2$  (79 mg, 143  $\mu\text{mol}$ ) and  $\text{Li}[\text{HBEt}_3]$  (0.05 M in THF, 2.7 mL, 135  $\mu\text{mol}$ ) furnished a clear, pale yellow solution. A  $^1\text{H}$  NMR spectroscopic investigation ( $\text{THF-}d_8$ ) showed the quantitative consumption of  $1\text{H}_2$  and the formation of two new major compounds (*i.e.*, the primary hydride trapping product  $\text{Li}[10]$  and its isomer  $\text{Li}[7]$ ). After heating the sample at  $50^\circ\text{C}$  for 1 h,  $\text{Li}[7]$  became by far the major constituent of the product mixture ( $>70\%$ ).

To obtain crystals, a solution of  $\text{Li}[\text{HBEt}_3]$  (0.2 M, 0.36 mL, 72  $\mu\text{mol}$ ) in  $\text{THF}/\text{Et}_2\text{O}$  (1:4) was added at room temperature to a colorless suspension of  $1\text{H}_2$  (40 mg, 72  $\mu\text{mol}$ ) in  $\text{Et}_2\text{O}$  (3 mL). After stirring for 10 min, the reaction mixture was filtered through a PTFE syringe filter (0.2  $\mu\text{m}$ ). Colorless thin needles of  $[\text{Li}(\text{thf})_3(\text{Et}_2\text{O})][7]$  grew from the filtrate at room temperature within 1 d.

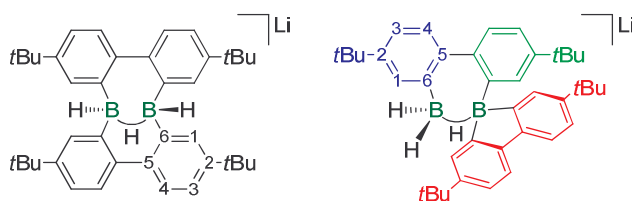

Figure S3. NMR numbering scheme for the primary hydride trapping product  $\text{Li}[10]$  (left) and its isomer  $\text{Li}[7]$  (right).

*Li[10]*

$^1\text{H}$  NMR (500.2 MHz,  $\text{THF-}d_8$ ):  $\delta$  = 7.61 (d,  $^4J(\text{H,H})$  = 1.9 Hz, 2H; H-1), 7.27 (d,  $^3J(\text{H,H})$  = 8.0 Hz, 2H; H-4), 7.11 (dd,  $^3J(\text{H,H})$  = 8.0 Hz,  $^4J(\text{H,H})$  = 1.9 Hz, 2H; H-3), 6.94 (d,  $^3J(\text{H,H})$  = 8.0 Hz, 2H; H-4), 6.78 (d,  $^4J(\text{H,H})$  = 1.9 Hz, 2H; H-1), 6.59 (dd,  $^3J(\text{H,H})$  = 8.0 Hz,  $^4J(\text{H,H})$  = 1.9 Hz, 2H; H-3), 1.38 (s, 18H;  $\text{CH}_3$ ), 0.94 (s, 18H;  $\text{CH}_3$ ).

$^7\text{Li}$  NMR (194.4 MHz,  $\text{THF-}d_8$ ):  $\delta$  =  $-0.6$ .

$^{11}\text{B}$  NMR (96.3 MHz,  $\text{THF-}d_8$ ):  $\delta$  = 33.5 (br), 8.2 (br).

$^{13}\text{C}\{^1\text{H}\}$  NMR (125.8 MHz,  $\text{THF-}d_8$ ):  $\delta$  = 149.6 (C-6), 149.2 (C-6), 145.4 (C-2), 144.8 (C-5), 144.5 (C-2), 141.5 (C-5), 134.4 (C-1), 129.6 (C-1), 125.7 (C-4), 125.4 (C-4), 122.1 (C-3), 119.9 (C-3), 34.6 (CCH<sub>3</sub>), 34.2 (CCH<sub>3</sub>), 32.1 (CH<sub>3</sub>), 31.6 (CH<sub>3</sub>).

Resonances of the same color belong to the same phenyl ring (as confirmed by 2D NMR experiments).

Li[7]

$^1\text{H}$  NMR (500.2 MHz, THF- $d_8$ ):  $\delta$  = 7.48 (d,  $^4J(\text{H,H})$  = 2.3 Hz, 1H; H-1), 7.39 (d,  $^4J(\text{H,H})$  = 2.3 Hz, 1H; H-1), 7.38 (d,  $^3J(\text{H,H})$  = 8.0 Hz, 1H; H-4), 7.31 (d,  $^3J(\text{H,H})$  = 7.9 Hz, 2H; H-4), 7.29 (d,  $^3J(\text{H,H})$  = 8.0 Hz, 1H; H-4), 7.23 (dd,  $^3J(\text{H,H})$  = 8.0 Hz,  $^4J(\text{H,H})$  = 2.3 Hz, 1H; H-3), 7.05 (dd,  $^3J(\text{H,H})$  = 8.0 Hz,  $^4J(\text{H,H})$  = 2.3 Hz, 1H; H-3), 6.97 (n.r., 2H; H-3), 2.6 (vbr, 1H; BH), 1.34 (s, 9H; CH<sub>3</sub>), 1.18 (s, 9H; CH<sub>3</sub>), 1.18 (br, 18H; CH<sub>3</sub>), n.o. (H-1 (2H), BH (2H)).

$^7\text{Li}$  NMR (194.4 MHz, THF- $d_8$ ):  $\delta$  = -0.7.

$^{11}\text{B}$  NMR (96.3 MHz, THF- $d_8$ ):  $\delta$  = -3.6 (br), -10.1 (br).

$^{13}\text{C}\{^1\text{H}\}$  NMR (125.8 MHz, THF- $d_8$ ):  $\delta$  = 147.4 (br), 147.0, 146.5, 145.9, 145.6, 145.5, 133.9 (C-1), 130.2 (C-1), 129.6 (C-1), 126.4 (C-4), 125.9 (C-4), 122.9 (C-3), 122.3 (C-3), 121.8 (C-3), 117.5 (C-4), 34.9 (CCH<sub>3</sub>), 34.8 (CCH<sub>3</sub>), 34.6 (CCH<sub>3</sub>), 32.2 (CH<sub>3</sub>), 32.1 (CH<sub>3</sub>), 32.0 (CH<sub>3</sub>), n.o. (3 x C<sup>Ar</sup>).

Resonances of the same color belong to the same phenyl ring (as confirmed by 2D NMR experiments). Signals marked in red could be unequivocally assigned, because they possess double intensity; the blue/green resonances were tentatively assigned by comparison of their chemical shift values with those of a related compound featuring a B–B bond instead of the bridging H atom.<sup>S5</sup>

**Reaction of 1H<sub>2</sub> with exc. LiH.** In an NMR tube, THF- $d_8$  (0.6 mL) was added at room temperature to a solid mixture of 1H<sub>2</sub> (7 mg, 13  $\mu\text{mol}$ ) and LiH (15 mg, 1.9 mmol).  $^1\text{H}$  and  $^{11}\text{B}$  NMR spectra recorded on this mixture after 10 h showed no reaction. However, upon heating (60 °C, 1 d) the lithium dihydrido-2,7-di(*t*Bu)-9-boratafluorene<sup>S3</sup> evolved as the major product (ca. 80%); further heating at 100 °C for 1d resulted in the quantitative conversion of 1H<sub>2</sub> to the lithium dihydrido-2,7-di(*t*Bu)-9-boratafluorene.

## Deuterium-labeling experiments

### (A) Synthesis of **1D<sub>2</sub>**

Compound **1D<sub>2</sub>** was obtained according to the published synthesis of **1H<sub>2</sub>**,<sup>S1</sup> but by using Et<sub>3</sub>SiD instead of Et<sub>3</sub>SiH (Scheme S1).

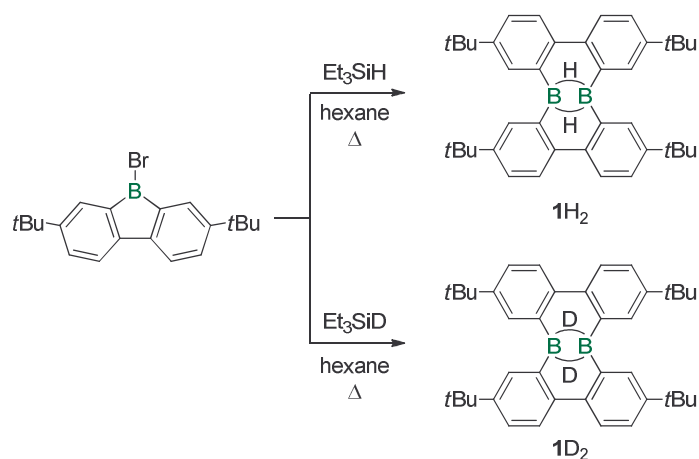

Scheme S1. Reaction of 2,7-di(*t*Bu)-9-Br-9-borafluorene with Et<sub>3</sub>SiH or Et<sub>3</sub>SiD to afford **1H<sub>2</sub>** or **1D<sub>2</sub>**, respectively.

### **1D<sub>2</sub>**

The <sup>1</sup>H, <sup>11</sup>B{<sup>1</sup>H}, and <sup>13</sup>C{<sup>1</sup>H} NMR spectra (C<sub>6</sub>D<sub>6</sub>) of **1H<sub>2</sub>**<sup>S1</sup> and **1D<sub>2</sub>** are identical with the exception of a broad proton resonance at 3.5 ppm, which has been assigned to the bridging H-atoms in **1H<sub>2</sub>**<sup>S1</sup> and which is missing in **1D<sub>2</sub>**. Instead, **1D<sub>2</sub>** shows a signal at 3.4 ppm in the <sup>2</sup>H NMR spectrum.

### (B) Reaction of $1H_2$ with $D_3CLi$

A solution of  $D_3CLi \cdot LiI$  in  $Et_2O$  (0.5 M, 0.05 mL, 25  $\mu$ mol) was evaporated to dryness in an NMR tube. The resulting colorless residue was dissolved in  $THF-d_8$  and the solution was frozen at  $-196$   $^{\circ}C$ . Colorless  $1H_2$  (14 mg, 25  $\mu$ mol) was added, the NMR tube was vacuum sealed, and warmed to room temperature. The orange reaction mixture was analyzed by NMR spectroscopy (see section D).

### (C) Reaction of $1D_2$ with $H_3CLi$

A solution of  $H_3CLi$  in  $Et_2O$  (0.25 M, 0.14 mL, 35  $\mu$ mol) was evaporated to dryness in an NMR tube. The resulting colorless residue was dissolved in  $THF-d_8$  and the solution was frozen at  $-196$   $^{\circ}C$ . Colorless  $1D_2$  (20 mg, 36  $\mu$ mol) was added, the NMR tube was vacuum sealed, and warmed to room temperature. The orange reaction mixture was analyzed by NMR spectroscopy (see section D).

### (D) Results of the deuterium-labeling experiments

The reactions  $D_3CLi/1H_2$  and  $H_3CLi/1D_2$  in  $THF-d_8$  give complex product mixtures in which  $Li[1H]/Li[1D]$  and  $Li[2]/Li[2-d_3]$  are present as major constituents (Figure S4). The additional, poorly resolved signals in the range 7.7 ppm to 6.5 ppm are due to hydride-trapping products. The product distributions critically depend on the exact stoichiometries employed.

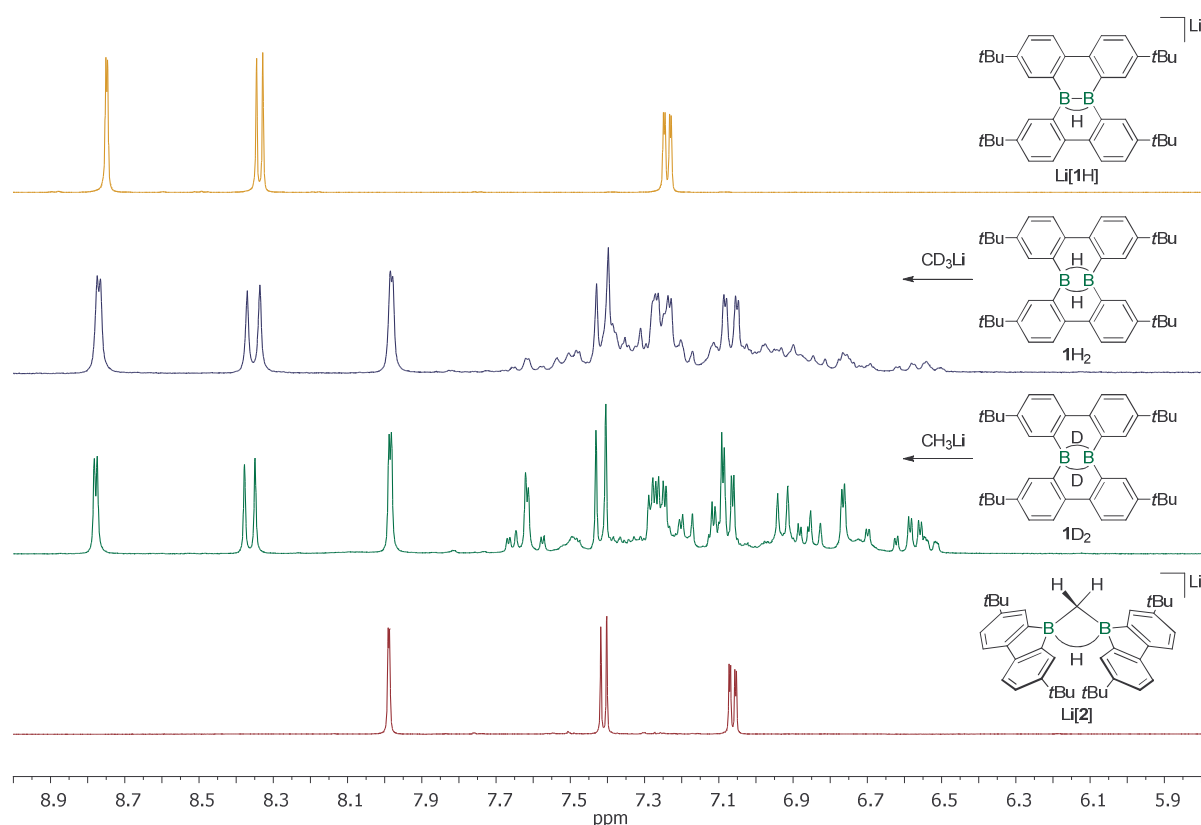

Figure S4. Aromatic regions of  $^1H$  NMR spectra ( $THF-d_8$ ) recorded on the reaction mixtures of  $D_3CLi/1H_2$  (blue; 250.1 MHz) and  $H_3CLi/1D_2$  (green; 300.0 MHz). Matching spectra of  $Li[1H]$  (orange; 500.2 MHz) and  $Li[2]$  (red; 500.2 MHz) are shown for comparison. *Note:* The spectra have been recorded at different spectrometer frequencies, which leads to slight differences in the line shapes of corresponding signals.



Li[2] shows two characteristic  $^1\text{H}$  NMR signals, which are particularly relevant for the mechanistic considerations: a broad resonance at 1.94 ppm ( $\mu\text{-H}$ ) and a doublet at 0.49 ppm ( $\text{CH}_2$ ). Both signals are observed in the  $^1\text{H}$  NMR spectra of  $\text{H}_3\text{CLi}/\mathbf{1D}_2$ , but absent in  $\text{D}_3\text{CLi}/\mathbf{1H}_2$  (Figure S5). Thus, the  $\mu\text{-H}$  atom of Li[2] does not originate from the boron-bonded H atoms of the diborane(6) starting material ( $\mathbf{1H}_2$ ). Rather, all the  $\text{CH}_2$  and  $\mu\text{-H}$  atoms originate from the methyllithium reagent.

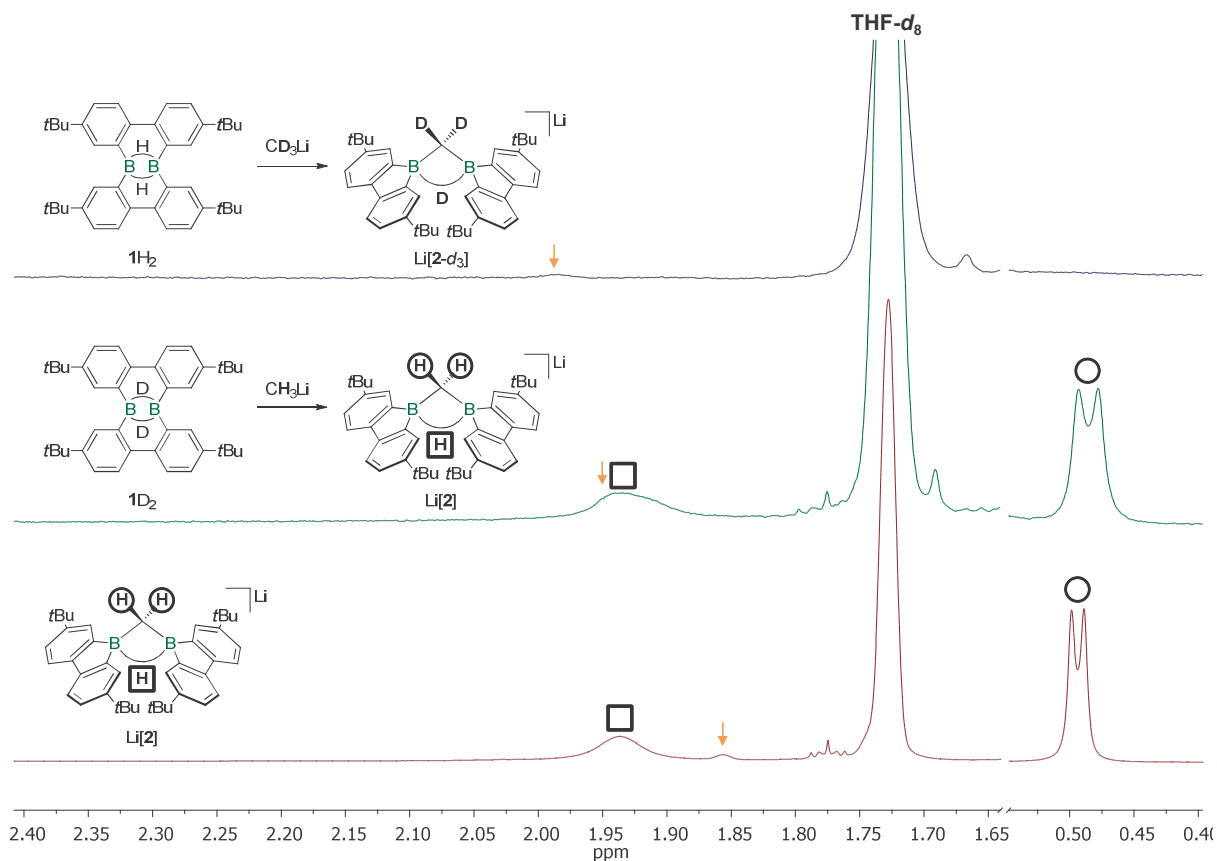

Figure S5.  $^1\text{H}$  NMR spectra ( $\text{THF-}d_8$ ) recorded on the reaction solutions of  $\text{D}_3\text{CLi}/\mathbf{1H}_2$  (blue; 250.1 MHz) and  $\text{H}_3\text{CLi}/\mathbf{1D}_2$  (green; 300.0 MHz). A spectrum of Li[2] (red; 500.2 MHz) is shown for comparison. *Note:* The orange-colored arrows mark the  $^{13}\text{C}$  satellites of the solvent. The spectra have been recorded at different spectrometer frequencies, which leads to slight differences in the line shapes of corresponding signals and in the positions of the satellites. The integral values of the satellite signals are negligible compared to those of the other resonances. Both in the green and in the red spectrum, the integral ratio of the  $\mu\text{-H}$  signal relative to the  $\text{CH}_2$  signal is 1:2.

The reactions  $D_3CLi/1H_2$  and  $H_3CLi/1D_2$  afford  $D_3CH$  [ $\delta(^1H) = 0.14$ , sept,  $^2J(H,D) = 1.9$  Hz;  $\delta(^2H) = 0.14$ , d,  $^2J(H,D) = 1.9$  Hz] and  $CH_3D$  [ $\delta(^1H) = 0.18$ , t,  $^2J(H,D) = 1.9$  Hz;  $\delta(^2H) = 0.18$ , q,  $^2J(H,D) = 1.9$  Hz], respectively, as byproducts (Figure S6). The presence of small amounts of  $CH_4$  are attributable to the fact that the  $Et_3SiD$  employed contained only 98 atom-% deuterium and to minor hydrolysis during sample preparation.

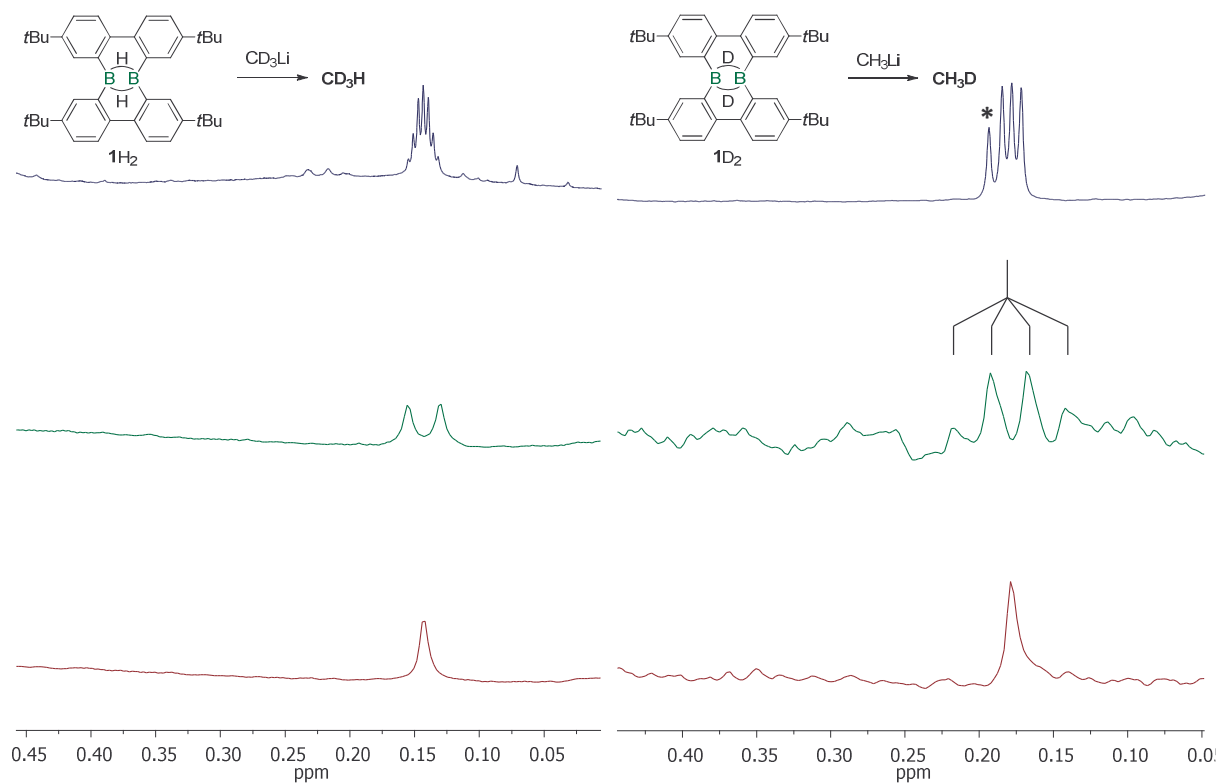

Figure S6. Stacked  $^1H$  (blue; 500.2 MHz),  $^2H$  (green; 76.8 MHz) and  $^2H\{^1H\}$  (red) NMR spectra, recorded on the mixtures  $D_3CLi/1H_2$  (left) and  $H_3CLi/1D_2$  (right). The reactions were carried out in sealed NMR tubes ( $THF-d_8$ ) and the spectra confirm the presence of  $D_3CH$  (left) and  $CH_3D$  (right). The signal marked with an asterisk corresponds to  $CH_4$  (approximately 10% relative to  $CH_3D$  according to the integral values).

**Reaction of Li[1H] with H<sub>3</sub>CLi to furnish Li<sub>2</sub>[4] and follow-up reaction with 1H<sub>2</sub>.** A solution of H<sub>3</sub>CLi in Et<sub>2</sub>O (1.4 M, 15  $\mu$ L, 21  $\mu$ mol) was evaporated to dryness in an NMR tube. The addition of yellow [Li(thf)<sub>3</sub>][1H] (16 mg, 21  $\mu$ mol) in THF-*d*<sub>8</sub> (0.6 mL) at room temperature furnished an orange-colored solution. The NMR tube was vacuum sealed and <sup>1</sup>H and <sup>11</sup>B NMR spectra were recorded. The spectra did not show the resonances of Li[2], but rather signal patterns assignable to Li<sub>2</sub>[4] (Figures S8 and Figures S26). The sample was transferred to a new NMR tube, which had already been charged with 1H<sub>2</sub> (11 mg, 20  $\mu$ mol). <sup>1</sup>H NMR spectroscopy confirmed an approximate 45% conversion to Li[2] and revealed the presence of a primary hydride trapping product Li[10], together with its rearranged isomer Li[7] (Figure S8).

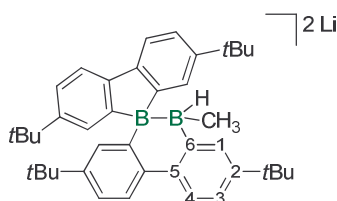

Figure S7. NMR numbering scheme for Li<sub>2</sub>[4].

#### Li<sub>2</sub>[4]

**<sup>1</sup>H NMR (300.0 MHz, THF-*d*<sub>8</sub>):**  $\delta$  = 8.1 (vbr, 1H), 7.64 (d, <sup>3</sup>J(H,H) = 8.0 Hz, 1H; H-4), 7.53 (n.r., 1H), 7.2 (vbr, 2H), 7.19 (d, <sup>3</sup>J(H,H) = 7.9 Hz, 1H; H-4), 6.9 (vbr, 1H), 6.88 (dd, <sup>3</sup>J(H,H) = 7.9 Hz, <sup>4</sup>J(H,H) = 2.4 Hz, 1H; H-3), 6.76 (vbr, 2H), 1.35 (vbr, 9H; CCH<sub>3</sub>), 1.26 (s, 9H; CCH<sub>3</sub>), 1.20 (br, 9H; CCH<sub>3</sub>), 1.08 (vbr, 9H; CCH<sub>3</sub>), -0.1 (vbr, 3H; BCH<sub>3</sub>). *Note:* An aryl resonance contributing the missing 2H is likely present at approximately 7.3 ppm, however, due to the broad line shapes and signal overlaps it cannot be unequivocally detected. Integration of the entire aryl region gives a sufficiently high integral value to match the required overall 12 aryl protons.

**<sup>11</sup>B NMR (96.3 MHz, THF-*d*<sub>8</sub>):**  $\delta$  = -10.3 (*h*<sub>1/2</sub> = 80 Hz), -12.8 (*h*<sub>1/2</sub> = 200 Hz, B(H)CH<sub>3</sub>). *Note:* Only the signal at -12.8 ppm becomes significantly sharper upon proton decoupling.

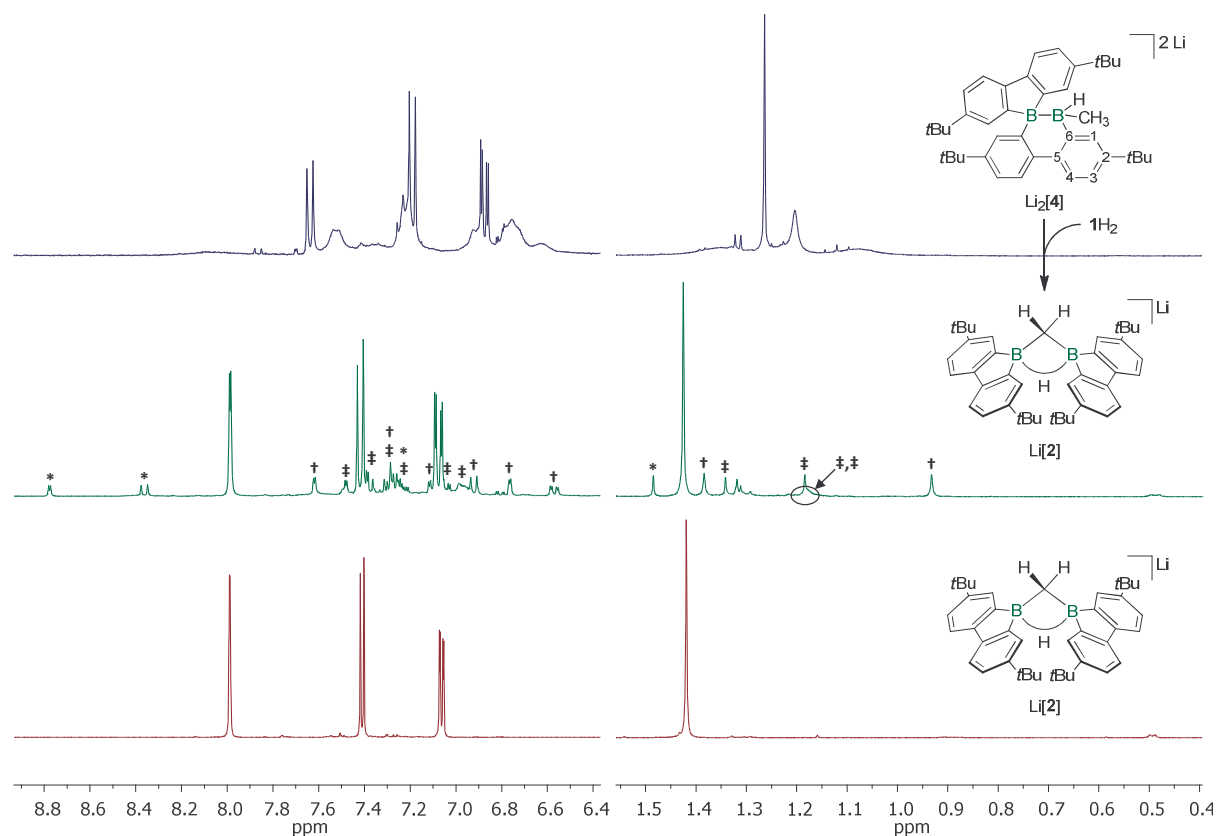

Figure S8.  $^1\text{H}$  NMR spectrum of  $\text{Li}_2[4]$ , obtained from the reaction  $\text{H}_3\text{ClLi}/\text{Li}[1\text{H}]$  (top; 300.0 MHz). Middle:  $^1\text{H}$  NMR spectrum showing the formation of  $\text{Li}[2]$  as major product of the reaction  $\text{H}_3\text{ClLi}/\text{Li}[1\text{H}]$ , after the addition of 1 equiv.  $1\text{H}_2$  (middle; 300.0 MHz). The marked minor signals belong to  $\text{Li}[1\text{H}]$  (\*) and the primary hydride trapping product  $\text{Li}[10]$  (†), which isomerizes over time to give  $\text{Li}[7]$  (‡).  $^1\text{H}$  NMR spectrum of an authentic sample of  $\text{Li}[2]$  (bottom; 500.2 MHz). All NMR spectra were recorded in  $\text{THF-}d_8$ ; aromatic and alkyl regions are scaled differently.

## Formation of Li<sub>2</sub>[**11**]

*Method A: Reaction of Li[**1H**] with tBuCCLi.* Yellow [Li(thf)<sub>3</sub>][**1H**] (20 mg, 26 μmol) in THF-*d*<sub>8</sub> (0.5 mL) was added at room temperature to an NMR tube charged with solid colorless tBuCCLi (2.3 mg, 26 μmol). A <sup>1</sup>H NMR spectroscopic investigation of the orange-colored solution revealed an almost quantitative consumption of the starting material and the concomitant formation of Li<sub>2</sub>[**11**]. The reaction mixture was layered with hexane/12-crown-4 and stored at room temperature, whereupon orange single crystals of [Li(thf)(12-crown-4)][Li(thf)<sub>2</sub>][**11**] formed.

*Method B: Reaction of Li<sub>2</sub>[**1**] with HCtBu.* A twofold excess of neat tBuCCH (4 μL, 2.7 mg, 33 μmol) was added at room temperature to a solution of [Li(thf)<sub>3</sub>]<sub>2</sub>[**1**] (15 mg, 15 μmol) in THF-*d*<sub>8</sub> (0.5 mL). The progress of the slow reaction was monitored by <sup>1</sup>H NMR spectroscopy (Figure S10). After 1 month, the signal pattern of Li<sub>2</sub>[**11**] had developed to a significant extent.

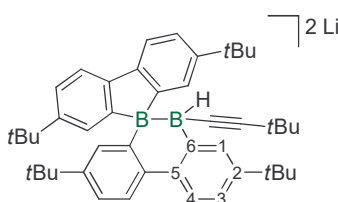

Figure S9. Schematic representation of Li<sub>2</sub>[**11**].

### Li<sub>2</sub>[**11**]

**<sup>1</sup>H NMR (300.0 MHz, THF-*d*<sub>8</sub>):** δ = 8.2 (vbr, 1H), 7.61 (d, <sup>3</sup>J(H,H) = 8.0 Hz, 1H; H-4), 7.50 (n.r., 1H), 7.32 (n.r., 2H), 7.23 (d, <sup>3</sup>J(H,H) = 7.9 Hz, 1H; H-4), 7.12-6.95 (m, 2H), 6.82 (dd, <sup>3</sup>J(H,H) = 7.8 Hz, <sup>4</sup>J(H,H) = 2.1 Hz, 2H; H-3), 1.36 (vbr, 9H; C(CH<sub>3</sub>)<sub>3</sub>), 1.30 ppm (s, 9H; C(CH<sub>3</sub>)<sub>3</sub>), 1.19 (s, 9H; C(CH<sub>3</sub>)<sub>3</sub>), 1.09 (vbr, 9H; C(CH<sub>3</sub>)<sub>3</sub>), 0.97 (br, 9H; C≡CC(CH<sub>3</sub>)<sub>3</sub>). *Note:* An aryl resonance contributing the missing 2H cannot be unequivocally detected. Integration of the entire aryl region gives a sufficiently high integral value to match the required overall 12 aryl protons.

**<sup>11</sup>B NMR (96.3 MHz, THF-*d*<sub>8</sub>):** δ = -11.8 (*h*<sub>1/2</sub> = 60 Hz), -23.3 (*h*<sub>1/2</sub> = 190 Hz; B(H)CCtBu). *Note:* Only the signal at -23.3 ppm becomes significantly sharper upon proton decoupling.

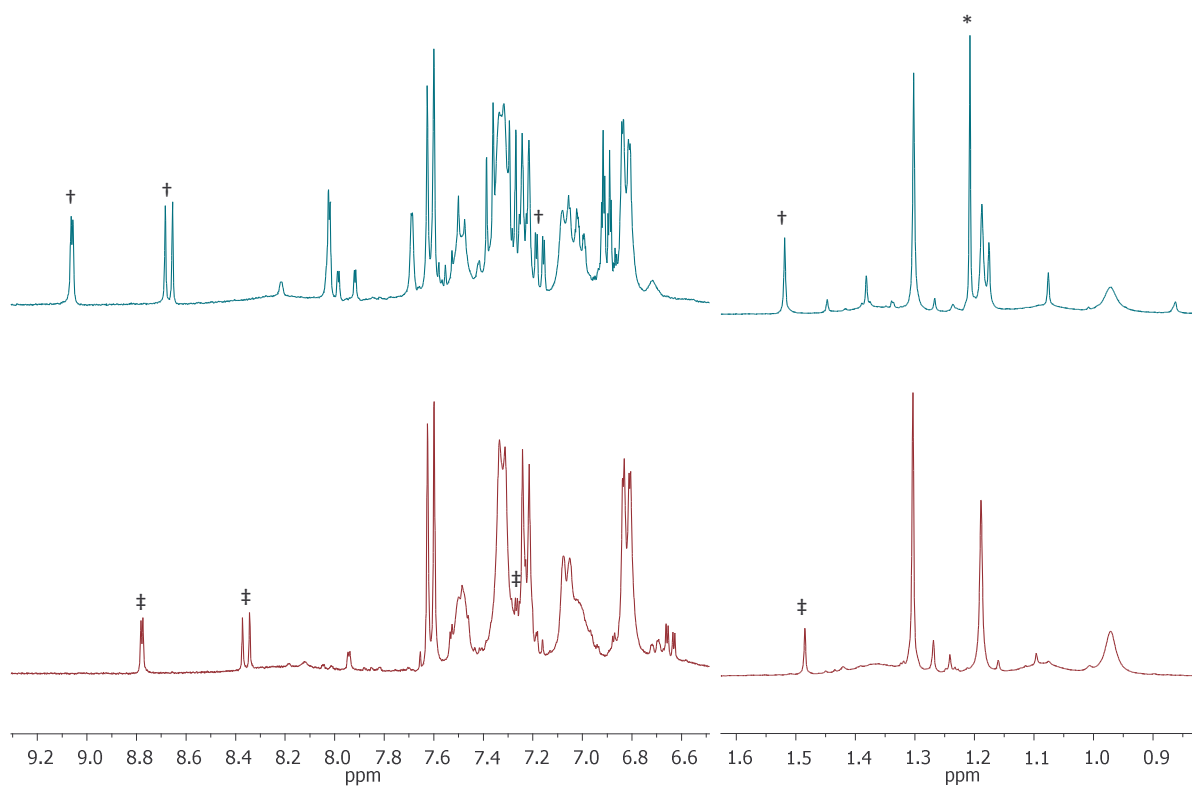

Figure S10:  $^1\text{H}$  NMR spectra (300.0 MHz;  $\text{THF-}d_8$ ) of the reaction mixtures 2  $t\text{BuCCH}/\text{Li}_2[\mathbf{1}]$  after 30 d (top) and  $t\text{BuCClLi}/\text{Li}[\mathbf{1H}]$  after 1 d (bottom). Additional signals belong to residual  $\text{Li}_2[\mathbf{1}]$  ( $\dagger$ ),  $\text{Li}[\mathbf{1H}]$  ( $\ddagger$ ), and  $t\text{BuCCH}$  (\*).

**Reaction of Li<sub>2</sub>[1] with 1 equiv. of H<sub>3</sub>C-I.** Neat H<sub>3</sub>C-I (0.9 μL, 2.1 mg, 15 μmol) was added at room temperature with stirring to a dark red solution of [Li(thf)<sub>3</sub>]<sub>2</sub>[1] (15 mg, 15 μmol) in THF-*d*<sub>8</sub> (0.6 mL). A <sup>1</sup>H, <sup>11</sup>B, and <sup>13</sup>C{<sup>1</sup>H} NMR spectroscopic investigation of the resulting pale yellow solution revealed the conversion of Li<sub>2</sub>[1] to Li[2] (major product) and **13** (minor product).

For the NMR data of Li[2] see the reaction H<sub>3</sub>CLi/1H<sub>2</sub>.

**Reaction of Li<sub>2</sub>[1] with excess H<sub>3</sub>CCl.** Neat dark red [Li(thf)<sub>3</sub>]<sub>2</sub>[1] (25 mg, 25 μmol) was placed in a J. Young flask (30 mL) and dissolved in THF (2 mL). The solution was frozen at -196 °C. The flask was evacuated, closed, allowed to warm to room temperature, and filled with H<sub>3</sub>CCl gas (1 atm), whereupon the stirred solution instantaneously changed its color from red to orange. All volatiles were removed in a dynamic vacuum and the orange solid residue was dissolved in THF-*d*<sub>8</sub>. A <sup>1</sup>H and <sup>11</sup>B NMR spectroscopic investigation revealed the quantitative conversion of Li<sub>2</sub>[1] to Li[2]. The entire sample was transferred to a small vial, which was placed in a larger vessel containing hexane (2 mL). The outer vessel was covered with a lid to allow for gas-phase diffusion of the solvents in a closed environment. Colorless crystalline material of [Li(thf)<sub>4</sub>][2] (17 mg, 20 μmol, 80%) was obtained. For the NMR data of Li[2], see the reaction H<sub>3</sub>CLi/1H<sub>2</sub>.

**Reaction of Li<sub>2</sub>[1] with 3 equiv. of H<sub>3</sub>C-I.** Neat H<sub>3</sub>C-I (2.8 μL, 6.4 mg, 45 μmol) was added at room temperature with stirring to a dark red solution of [Li(thf)<sub>3</sub>]<sub>2</sub>[1] (15 mg, 15 μmol) in THF-*d*<sub>8</sub> (0.6 mL). A <sup>1</sup>H, <sup>11</sup>B, and <sup>13</sup>C{<sup>1</sup>H} NMR spectroscopic investigation of the resulting pale yellow solution revealed the quantitative conversion of Li<sub>2</sub>[1] to **13**.

**Reaction of Li<sub>2</sub>[1] with 2 equiv. of methyl triflate.** Neat methyl triflate (2.8 μL, 4.0 mg, 25 μmol) was added at room temperature with stirring to a dark red solution of [Li(thf)<sub>3</sub>]<sub>2</sub>[1] (12 mg, 12 μmol) in C<sub>6</sub>H<sub>6</sub> (0.5 mL). All volatiles were removed in a dynamic vacuum and the residue was dissolved in THF-*d*<sub>8</sub>. A <sup>1</sup>H, <sup>11</sup>B, and <sup>13</sup>C{<sup>1</sup>H} NMR spectroscopic investigation of the yellow solution confirmed the quantitative conversion of Li<sub>2</sub>[1] to **13**. The addition of only 1.1 equiv. of methyl triflate to [Li(thf)<sub>3</sub>]<sub>2</sub>[1] in C<sub>6</sub>H<sub>6</sub> furnished Li[2] as the major product, which crystallizes as at room temperature from the reaction solution in the form of [Li(thf)<sub>3</sub>][2]. For the NMR data of Li[2], see the reaction H<sub>3</sub>CLi/1H<sub>2</sub>.

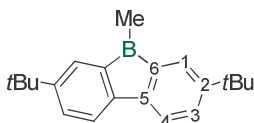

Figure S11. NMR numbering scheme for **13**.

### **13**

**<sup>1</sup>H NMR (500.2 MHz, THF-*d*<sub>8</sub>):** δ = 7.50 (dd, <sup>4</sup>J(H,H) = 2.0 Hz, <sup>5</sup>J(H,H) = 0.6 Hz, 2H; H-1), 7.38 (dd, <sup>3</sup>J(H,H) = 7.9 Hz, <sup>5</sup>J(H,H) = 0.6 Hz, 2H; H-4), 7.16 (dd, <sup>3</sup>J(H,H) = 7.9 Hz, <sup>4</sup>J(H,H) = 2.0 Hz, 2H; H-3), 1.33 (s, 18H; CCH<sub>3</sub>), 0.31 (s, 3H; BCH<sub>3</sub>).

**<sup>11</sup>B NMR (160.5 MHz, THF-*d*<sub>8</sub>):** δ = 13.7.

**<sup>13</sup>C{<sup>1</sup>H} NMR (125.8 MHz, THF-*d*<sub>8</sub>):** δ = 152.6 (br, C-6), 148.6 (C-2), 147.3 (C-5), 127.3 (C-1), 124.5 (C-3), 118.5 (C-4), 34.9 (CCH<sub>3</sub>), 31.9 (CH<sub>3</sub>), 3.2 (BCH<sub>3</sub>).

*Note:* An authentic sample of **13**, prepared from 2,7-di(*t*Bu)-9-Br-9-borafluorene and H<sub>3</sub>CMgI in Et<sub>2</sub>O/toluene, gave identical NMR shift values.

**Reaction of Li<sub>2</sub>[1] with 1 equiv. ethyl bromide.** Neat ethyl bromide (1.3  $\mu$ L, 1.9 mg, 17  $\mu$ mol) was added at room temperature with stirring to a dark red solution of [Li(thf)<sub>3</sub>]<sub>2</sub>[1] (15 mg, 15  $\mu$ mol) in THF-*d*<sub>8</sub> (0.5 mL). A <sup>1</sup>H, <sup>11</sup>B, and <sup>13</sup>C{<sup>1</sup>H} NMR spectroscopic investigation of the resulting yellow solution revealed the quantitative conversion of Li<sub>2</sub>[1] to Li[19].

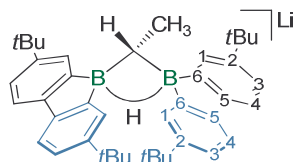

Figure S12. NMR numbering scheme for Li[19].

**Li[19]**

**<sup>1</sup>H NMR (500.2 MHz, THF-*d*<sub>8</sub>):**  $\delta$  = 8.14 (d, <sup>4</sup>*J*(H,H) = 1.6 Hz, 2H; H-1), 7.99 (d, <sup>4</sup>*J*(H,H) = 1.6 Hz, 2H; H-1), 7.45 (d, <sup>3</sup>*J*(H,H) = 7.8 Hz, 2H; H-4), 7.42 (d, <sup>3</sup>*J*(H,H) = 7.8 Hz, 2H; H-4), 7.09 (dd, <sup>3</sup>*J*(H,H) = 7.8 Hz, <sup>4</sup>*J*(H,H) = 1.6 Hz, 2H; H-3), 7.06 (dd, <sup>3</sup>*J*(H,H) = 7.8 Hz, <sup>4</sup>*J*(H,H) = 1.6 Hz, 2H; H-3), 2.02 (br, 1H;  $\mu$ -H), 1.47 (d, <sup>3</sup>*J*(H,H) = 7.0 Hz, 3H; CHCH<sub>3</sub>), 1.44 (s, 18H, C(CH<sub>3</sub>)<sub>3</sub>), 1.43 (s, 18H, C(CH<sub>3</sub>)<sub>3</sub>), 0.95 (qd, <sup>3</sup>*J*(H,H) = 7.0 Hz, <sup>3</sup>*J*(H,H) = 3.0 Hz, 1H; CHCH<sub>3</sub>).

**<sup>7</sup>Li NMR (116.6 MHz, THF-*d*<sub>8</sub>):**  $\delta$  = -1.8.

**<sup>11</sup>B NMR (160.5 MHz, THF-*d*<sub>8</sub>):**  $\delta$  = -12.6 (br).

**<sup>13</sup>C{<sup>1</sup>H} NMR (125.8 MHz, THF-*d*<sub>8</sub>):**  $\delta$  = 159.6 (C-6), 156.5 (C-6), 148.3 (C-5), 147.4 (C-5), 146.3 (C-2), 146.0 (C-2), 130.1 (C-1), 127.9 (C-1), 121.7 (C-3), 121.6 (C-3), 117.7 (C-4), 117.6 (C-4), 35.2 (C(CH<sub>3</sub>)<sub>3</sub>), 35.2 (C(CH<sub>3</sub>)<sub>3</sub>), 32.6 (C(CH<sub>3</sub>)<sub>3</sub>), 14.3 (CHCH<sub>3</sub>), 11.0 (br, CHCH<sub>3</sub>).

*Note:* The tentative assignment of resonances to the blue vs black aromatic rings is based on 2D NMR experiments and a comparison with the NMR spectra of the corresponding compound Li[2] featuring a symmetrical CH<sub>2</sub> bridge.



**Reaction of Li<sub>2</sub>[1] with benzyl chloride.** A dark red solution of [Li(thf)<sub>3</sub>]<sub>2</sub>[1] (30 mg, 30 μmol) in THF-*d*<sub>8</sub> (0.3 mL) was added dropwise with stirring at room temperature to benzyl chloride (4.1 μL, 4.5 mg, 36 μmol) in THF-*d*<sub>8</sub> (0.2 mL). A <sup>1</sup>H, <sup>11</sup>B, and <sup>13</sup>C{<sup>1</sup>H} NMR spectroscopic investigation of the resulting yellow solution revealed the selective conversion of Li<sub>2</sub>[1] to Li[16] (> 90%). Upon addition of the reaction mixture to hexane (2 mL), a colorless precipitate formed. The mother liquor was removed, the precipitate washed with hexane (3 x 0.2 mL), and dried under vacuum to obtain pure Li[16] (according to NMR spectroscopy). Colorless single crystals of [Li(thf)<sub>4</sub>][16] were grown by gas-phase diffusion of hexane into a THF solution of Li[16] (3 d, room temperature). *Note:* Li[16] was also observed as the major product (> 90%) when 1 equiv. of benzyl bromide was used instead of benzyl chloride.

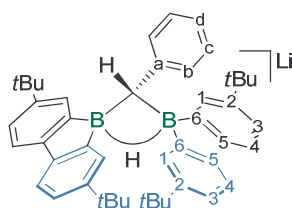

Figure S13. NMR numbering scheme for Li[16].

#### Li[16]

<sup>1</sup>H NMR (500.2 MHz, THF-*d*<sub>8</sub>): δ = 8.09 (n.r., 2H; H-1), 7.51 (n.r., 2H; H-1), 7.45 (d, <sup>3</sup>J(H,H) = 7.9 Hz, 2H; H-4), 7.43 (d, <sup>3</sup>J(H,H) = 7.9 Hz, 2H; H-4), 7.10 (dd, <sup>3</sup>J(H,H) = 7.9 Hz, <sup>4</sup>J(H,H) = n.r., 2H; H-3), 7.03-7.02 (m, 4H; H-3, H-b), 6.80-6.77 (m, 2H; H-c), 6.71-6.68 (m, 1H; H-d), 2.73 (s, 1H; BCH), 2.26 (br, 1H; BHB), 1.44 (s, 18H; CH<sub>3</sub>), 1.23 (s, 18H; CH<sub>3</sub>).

<sup>11</sup>B NMR (160.5 MHz, THF-*d*<sub>8</sub>): δ = -13.1 (br).

<sup>13</sup>C{<sup>1</sup>H} NMR (125.8 MHz, THF-*d*<sub>8</sub>): δ = 158.4 (br; C-6), 155.5 (br; C-6), 150.7 (C-a), 148.1 (C-5), 147.8 (C-5), 146.4 (C-2), 145.8 (C-2), 134.6 (C-b), 131.5 (C-1), 127.8 (C-1), 126.4 (C-c), 122.1 (C-3), 121.8 (C-d), 121.7 (C-3), 117.7 (C-4), 117.5 (C-4), 35.2 (CCH<sub>3</sub>), 35.0 (CCH<sub>3</sub>), 32.6 (CH<sub>3</sub>), 32.4 (CH<sub>3</sub>), 27.3 (br; BCH).

**Reaction of Li<sub>2</sub>[1] with the radical clock (bromomethyl)cyclopropane.** A dark red solution of [Li(thf)<sub>3</sub>]<sub>2</sub>[1] (12 mg, 12 μmol) in THF-*d*<sub>8</sub> (0.3 mL) was added dropwise with stirring at room temperature to (bromomethyl)cyclopropane (1.4 μL, 1.9 mg, 14 μmol) in THF-*d*<sub>8</sub> (0.2 mL). A <sup>1</sup>H, <sup>11</sup>B, and <sup>13</sup>C{<sup>1</sup>H} NMR spectroscopic investigation of the resulting yellow solution revealed the selective conversion of Li<sub>2</sub>[1] to Li[17] (> 90%). No signals were observed in the allylic region of the <sup>1</sup>H NMR spectrum. Note: Li[17] decomposes in THF-*d*<sub>8</sub> at room temperature within days.

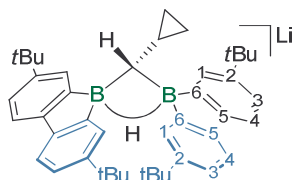

Figure S14. NMR numbering scheme for Li[17].

*Li[17]*

<sup>1</sup>H NMR (300.0 MHz, THF-*d*<sub>8</sub>): δ = 8.27 (d, <sup>4</sup>J(H,H) = 1.8 Hz, 2H; H-1), 7.92 (d, <sup>4</sup>J(H,H) = 1.8 Hz, 2H; H-1), 7.44 (d, <sup>3</sup>J(H,H) = 7.9 Hz, 2H; H-4), 7.41 (d, <sup>3</sup>J(H,H) = 7.9 Hz, 2H; H-4), 7.08 (dd, <sup>3</sup>J(H,H) = 7.9 Hz, <sup>4</sup>J(H,H) = 1.8 Hz, 2H; H-3), 7.05 (dd, <sup>3</sup>J(H,H) = 7.9 Hz, <sup>4</sup>J(H,H) = 1.8 Hz, 2H; H-3), 2.09 (br, 1H; BHB), 1.58-1.50 (m, 1H; CH<sub>2</sub>CH), 1.44 (s, 18H; CH<sub>3</sub>), 1.41 (s, 18H; CH<sub>3</sub>), 0.86 (dd, <sup>3</sup>J(H,H) = 6.3 Hz, <sup>3</sup>J(H,H) = 2.9 Hz, 1H; BCH), 0.25-0.19 (m, 2H; CH<sub>2</sub>), -0.14-(-0.19) (m, 2H; CH<sub>2</sub>).

<sup>11</sup>B NMR (96.3 MHz, THF-*d*<sub>8</sub>): δ = -14.9 (br).

<sup>13</sup>C{<sup>1</sup>H} NMR (125.8 MHz, THF-*d*<sub>8</sub>): δ = 159.4 (C-6), 156.8 (C-6), 148.2 (C-5), 147.5 (C-5), 146.4 (C-2), 145.9 (C-2), 130.6 (C-1), 127.7 (C-1), 121.8 (C-3), 121.6 (C-3), 117.7 (C-4), 117.6 (C-4), 35.2 (CCH<sub>3</sub>) 32.6 (CH<sub>3</sub>), 24.6 (br; BCH), 13.1 (CHCH<sub>2</sub>), 9.5 (CH<sub>2</sub>).

## Reactions of Li<sub>2</sub>[1] with $\alpha,\omega$ -dihaloalkanes

All reactions were conducted by adding a dark red solution of [Li(thf)<sub>3</sub>]<sub>2</sub>[1] in THF-*d*<sub>8</sub> (0.3 mL) at room temperature with stirring to a small excess of an  $\alpha,\omega$ -dihaloalkane X(CH<sub>2</sub>)<sub>*n*</sub>X in THF-*d*<sub>8</sub> (0.2 mL). The amounts of starting materials used in each individual experiment and the products obtained are listed in Table S1.

Table S1: Starting materials and products of the reactions of  $\alpha,\omega$ -dihaloalkanes X(CH<sub>2</sub>)<sub>*n*</sub>X with [Li(thf)<sub>3</sub>]<sub>2</sub>[1]. The percentages of conversion of the boron compound (determined through integration of the <sup>1</sup>H NMR spectra) are listed in parentheses.

|    | starting materials                                                                                                      | product(s)                                                                                                                                                                |
|----|-------------------------------------------------------------------------------------------------------------------------|---------------------------------------------------------------------------------------------------------------------------------------------------------------------------|
|    | <b>1,2-dihaloethane</b>                                                                                                 |                                                                                                                                                                           |
| Cl | 1,2-dichloroethane (1.7 $\mu$ L, 2.1 mg, 21 $\mu$ mol), [Li(thf) <sub>3</sub> ] <sub>2</sub> [1] (17 mg, 17 $\mu$ mol)  | <b>14</b> <sup>C2</sup> (100%)                                                                                                                                            |
| Br | 1,2-dibromoethane (1.8 $\mu$ L, 3.9 mg, 21 $\mu$ mol), [Li(thf) <sub>3</sub> ] <sub>2</sub> [1] (17 mg, 17 $\mu$ mol)   | <b>14</b> <sup>C2</sup> (100%)                                                                                                                                            |
|    | <b>1,3-dihaloopropane</b>                                                                                               |                                                                                                                                                                           |
| Cl | 1,3-dichloropropane (3.2 $\mu$ L, 3.8 mg, 34 $\mu$ mol), [Li(thf) <sub>3</sub> ] <sub>2</sub> [1] (30 mg, 30 $\mu$ mol) | Complex mixture of yet unidentified products                                                                                                                              |
| Br | 1,3-dibromopropane (3.6 $\mu$ L, 7.2 mg, 35 $\mu$ mol), [Li(thf) <sub>3</sub> ] <sub>2</sub> [1] (30 mg, 30 $\mu$ mol)  | <b>14</b> <sup>C3</sup> (> 90%; yield: 15 mg, 25 $\mu$ mol, 83%)                                                                                                          |
|    | <b>1,4-dihalobutane</b>                                                                                                 |                                                                                                                                                                           |
| Cl | 1,4-dichlorobutane (3.9 $\mu$ L, 4.5 mg, 36 $\mu$ mol), [Li(thf) <sub>3</sub> ] <sub>2</sub> [1] (30 mg, 30 $\mu$ mol)  | Li[ <b>15</b> <sup>C4,Cl</sup> ] (92%; yield: 17 mg, 21 $\mu$ mol, 70% (calcd for [Li(thf) <sub>2.5</sub> ][ <b>15</b> <sup>C4,Cl</sup> ])), <b>14</b> <sup>C4</sup> (8%) |
| Br | 1,4-dibromobutane (6.0 $\mu$ L, 11 mg, 50 $\mu$ mol), [Li(thf) <sub>3</sub> ] <sub>2</sub> [1] (42 mg, 42 $\mu$ mol)    | <b>14</b> <sup>C4</sup> (92%), Li[ <b>15</b> <sup>C4,Br</sup> ] (8%)                                                                                                      |
|    | <b>1,5-dihalopentane</b>                                                                                                |                                                                                                                                                                           |
| Cl | 1,5-dichloropentane (4.4 $\mu$ L, 4.8 mg, 34 $\mu$ mol), [Li(thf) <sub>3</sub> ] <sub>2</sub> [1] (29 mg, 29 $\mu$ mol) | Li[ <b>15</b> <sup>C5,Cl</sup> ] (> 90%)                                                                                                                                  |
| Br | 1,5-dibromopentane (4.8 $\mu$ L, 8.1 mg, 35 $\mu$ mol), [Li(thf) <sub>3</sub> ] <sub>2</sub> [1] (30 mg, 30 $\mu$ mol)  | Li[ <b>15</b> <sup>C5,Br</sup> ] (> 90%)                                                                                                                                  |
|    | <b>1,6-dihaloheptane</b>                                                                                                |                                                                                                                                                                           |
| Cl | 1,6-dichlorohexane (5.0 $\mu$ L, 5.3 mg, 34 $\mu$ mol), [Li(thf) <sub>3</sub> ] <sub>2</sub> [1] (29 mg, 29 $\mu$ mol)  | Li[ <b>15</b> <sup>C6,Cl</sup> ] (> 90%)                                                                                                                                  |
| Br | 1,6-dibromohexane (5.0 $\mu$ L, 7.9 mg, 33 $\mu$ mol), [Li(thf) <sub>3</sub> ] <sub>2</sub> [1] (28 mg, 28 $\mu$ mol)   | Li[ <b>15</b> <sup>C6,Br</sup> ] (> 90%)                                                                                                                                  |

The neutral compounds **14**<sup>C2</sup>, **14**<sup>C3</sup>, and **14**<sup>C4</sup> were crystallized by slow evaporation of the solvent. The crystals were rinsed with small volumes of hexane (**14**<sup>C2</sup>: 0 mL, **14**<sup>C3</sup>: 3 x 0.2 mL, **14**<sup>C4</sup>: 3 x 0.2 mL) and THF (**14**<sup>C2</sup>: 0 mL, **14**<sup>C3</sup>: 2 x 0.1 mL, **14**<sup>C4</sup>: 0 mL), and dried in a dynamic vacuum. The salts Li[**15**<sup>C4,Cl</sup>], Li[**15**<sup>C4,Br</sup>], Li[**15**<sup>C5,Cl</sup>], Li[**15**<sup>C5,Br</sup>], Li[**15**<sup>C6,Cl</sup>], and Li[**15**<sup>C6,Br</sup>] were precipitated from the reaction mixtures by addition of hexane (2 mL). The precipitates were washed with hexane (3 x 0.2 mL) and dried in a dynamic vacuum. Colorless single crystals of [Li(12-crown-4)<sub>2</sub>][**15**<sup>C5,Cl</sup>] were obtained by layering a solution of Li[**15**<sup>C5,Cl</sup>] in THF with hexane/12-crown-4 (3 d; room temperature).

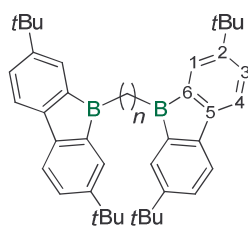

Figure S15. NMR numbering scheme for  $14^{Cn}$ .

**$14^{C2}$**

$^1\text{H NMR}$  (500.2 MHz, THF- $d_8$ ):  $\delta$  = 7.66 (d,  $^4J(\text{H,H})$  = 1.9 Hz, 4H; H-1), 7.39 (d,  $^3J(\text{H,H})$  = 7.8 Hz, 4H; H-4), 7.17 (dd,  $^3J(\text{H,H})$  = 7.8 Hz,  $^4J(\text{H,H})$  = 1.9 Hz, 4H; H-3), 1.35 (s, 36H; CH<sub>3</sub>), 1.07 (s, 4H; C<sub>2</sub>H<sub>4</sub>).

$^{11}\text{B NMR}$  (160.5 MHz, THF- $d_8$ ):  $\delta$  = 15.9.

$^{13}\text{C}\{^1\text{H}\}$  NMR (125.8 MHz, THF- $d_8$ ):  $\delta$  = 153.0 (C-6), 148.2 (C-2), 147.6 (C-5), 128.0 (C-1), 124.3 (C-3), 118.5 (C-4), 34.9 (CCH<sub>3</sub>), 32.0 (CH<sub>3</sub>), 16.1 (C<sub>2</sub>H<sub>4</sub>).

**$14^{C3}$**

$^1\text{H NMR}$  (500.2 MHz, THF- $d_8$ ):  $\delta$  = 7.48 (d,  $^4J(\text{H,H})$  = 1.9 Hz, 4H; H-1), 7.37 (d,  $^3J(\text{H,H})$  = 7.9 Hz, 4H; H-4), 7.13 (dd,  $^3J(\text{H,H})$  = 7.9 Hz,  $^4J(\text{H,H})$  = 1.9 Hz, 4H; H-3), 1.53-1.47 (m, 2H; CCH<sub>2</sub>), 1.30 (s, 36H; CH<sub>3</sub>), 0.95-0.92 (m, 4H; BCH<sub>2</sub>).

$^{11}\text{B NMR}$  (160.5 MHz, THF- $d_8$ ):  $\delta$  = 15.4 (vbr).

$^{13}\text{C}\{^1\text{H}\}$  NMR (125.8 MHz, THF- $d_8$ ):  $\delta$  = 152.7 (br; C-6), 148.3 (C-2), 147.6 (C-5), 128.1 (C-1), 124.2 (C-3), 118.4 (C-4), 34.9 (CCH<sub>3</sub>), 32.0 (CH<sub>3</sub>), 26.0 (br; BCH<sub>2</sub>), 23.0 (CCH<sub>2</sub>).

**$14^{C4}$**

$^1\text{H NMR}$  (500.2 MHz, THF- $d_8$ ):  $\delta$  = 7.51 (d,  $^4J(\text{H,H})$  = 1.9 Hz, 4H; H-1), 7.37 (d,  $^3J(\text{H,H})$  = 7.9 Hz, 4H; H-4), 7.14 (dd,  $^3J(\text{H,H})$  = 7.9 Hz,  $^4J(\text{H,H})$  = 1.9 Hz, 4H; H-3), 1.32 (s, 36H; CH<sub>3</sub>), 1.32-1.29 (m, 4H; BCCH<sub>2</sub>), 0.92-0.90 (m, 4H; BCH<sub>2</sub>).

$^{11}\text{B NMR}$  (160.5 MHz, THF- $d_8$ ):  $\delta$  = 14.4 (vbr).

$^{13}\text{C}\{^1\text{H}\}$  NMR (125.8 MHz, THF- $d_8$ ):  $\delta$  = 152.4 (br; C-6), 148.3 (C-2), 147.6 (C-5), 127.9 (C-1), 124.3 (C-3), 118.4 (C-4), 34.9 (CCH<sub>3</sub>), 32.0 (CH<sub>3</sub>), 30.9 (BCCH<sub>2</sub>), 21.5 (br; BCH<sub>2</sub>).

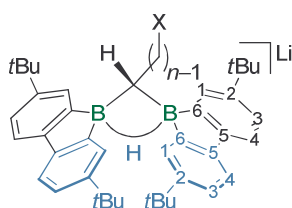

Figure S16. NMR numbering scheme for  $15^{Cn,X}$ .

*Li[15<sup>C4,Cl</sup>]*

$^1\text{H NMR}$  (500.2 MHz, THF- $d_8$ ):  $\delta$  = 8.15 (d,  $^4J(\text{H,H})$  = 1.9 Hz, 2H; H-1), 8.01 (d,  $^4J(\text{H,H})$  = 1.9 Hz, 2H; H-1), 7.46 (d,  $^3J(\text{H,H})$  = 7.9 Hz, 2H; H-4), 7.43 (d,  $^3J(\text{H,H})$  = 7.9 Hz, 2H; H-4), 7.10 (dd,  $^3J(\text{H,H})$  = 7.9 Hz,  $^4J(\text{H,H})$  = 1.9 Hz, 2H; H-3), 7.07 (dd,  $^3J(\text{H,H})$  = 7.9 Hz,  $^4J(\text{H,H})$  = 1.9 Hz, 2H; H-3), 3.19 (t,  $^3J(\text{H,H})$  = 7.4 Hz, 2H; ClCH<sub>2</sub>), 2.16 (vq,  $^3J(\text{H,H})$  = 7.4 Hz, 2H; BCCH<sub>2</sub>), 2.04 (br, 1H; BHB), 1.52 (vquint,  $^3J(\text{H,H})$  = 7.4 Hz, 2H; ClCCH<sub>2</sub>), 1.45 (s, 18H; CH<sub>3</sub>), 1.43 (s, 18H; CH<sub>3</sub>), 0.94 (dt,  $^3J(\text{H,H})$  = 7.8 Hz,  $^3J(\text{H,H})$  = 2.6 Hz, 1H; BCH).

$^{11}\text{B NMR}$  (160.5 MHz, THF- $d_8$ ):  $\delta$  = -13.0 (br).

$^{13}\text{C}\{^1\text{H}\}$  NMR (125.8 MHz, THF- $d_8$ ):  $\delta$  = 159.0 (br; C-6), 156.4 (br; C-6), 148.3 (C-5), 147.4 (C-5), 146.5 (C-2), 146.1 (C-2), 129.8 (C-1), 127.8 (C-1), 121.8 (C-3), 121.7 (C-3), 117.8 (C-4), 117.7 (C-4), 46.8 (ClCH<sub>2</sub>), 38.8 (ClCCH<sub>2</sub>), 35.3 (CCH<sub>3</sub>), 35.2 (CCH<sub>3</sub>), 32.7 (CH<sub>3</sub> or CH<sub>3</sub>), 32.6 (CH<sub>3</sub> or CH<sub>3</sub>), 28.2 (BCCH<sub>2</sub>), 19.3 (br; BCH).

*Li[15<sup>C5,Cl</sup>]*

$^1\text{H NMR}$  (500.2 MHz, THF- $d_8$ ):  $\delta$  = 8.16 (d,  $^4J(\text{H,H})$  = 1.8 Hz, 2H; H-1), 8.01 (d,  $^4J(\text{H,H})$  = 1.8 Hz, 2H; H-1), 7.46 (d,  $^3J(\text{H,H})$  = 7.9 Hz, 2H; H-4), 7.42 (d,  $^3J(\text{H,H})$  = 7.9 Hz, 2H; H-4), 7.09 (dd,  $^3J(\text{H,H})$  = 7.9 Hz,  $^4J(\text{H,H})$  = 1.8 Hz, 2H; H-3), 7.07 (dd,  $^3J(\text{H,H})$  = 7.9 Hz,  $^4J(\text{H,H})$  = 1.8 Hz, 2H; H-3), 3.14 (t,  $^3J(\text{H,H})$  = 7.3 Hz, 2H; ClCH<sub>2</sub>), 2.07 (vq,  $^3J(\text{H,H})$  = 7.5 Hz, 2H; BCCH<sub>2</sub>), 2.04 (br, 1H; BHB), 1.51 (vquint,  $^3J(\text{H,H})$  = 7.3 Hz, 2H; ClCCH<sub>2</sub>), 1.45 (s, 18H; CH<sub>3</sub>), 1.43 (s, 18H; CH<sub>3</sub>), 1.14 (vquint,  $^3J(\text{H,H})$  = 7.3 Hz, 2H; ClCCCH<sub>2</sub>), 0.93 (td,  $^3J(\text{H,H})$  = 7.6 Hz,  $^3J(\text{H,H})$  = 2.3 Hz, 1H; BCH).

$^{11}\text{B NMR}$  (160.5 MHz, THF- $d_8$ ):  $\delta$  = -13.7 (br).

$^{13}\text{C}\{^1\text{H}\}$  NMR (125.8 MHz, THF- $d_8$ ):  $\delta$  = 159.3 (br; C-6), 156.6 (br; C-6), 148.3 (C-5), 147.3 (C-5), 146.4 (C-2), 146.1 (C-2), 129.8 (C-1), 127.8 (C-1), 121.7 (C-3), 121.7 (C-3), 117.8 (C-4), 117.7 (C-4), 46.0 (ClCH<sub>2</sub>), 35.3 (CCH<sub>3</sub>), 35.2 (CCH<sub>3</sub>), 34.1 (ClCCH<sub>2</sub>), 32.7 (CH<sub>3</sub>, CH<sub>3</sub>), 32.4 (ClCCCH<sub>2</sub>), 29.7 (BCCH<sub>2</sub>), 20.4 (br; BCH).

*Li[15<sup>C5,Br</sup>]*

$^1\text{H NMR}$  (500.2 MHz, THF- $d_8$ ):  $\delta$  = 8.15 (d,  $^4J(\text{H,H})$  = 1.8 Hz, 2H; H-1), 8.01 (d,  $^4J(\text{H,H})$  = 1.8 Hz, 2H; H-1), 7.46 (d,  $^3J(\text{H,H})$  = 7.9 Hz, 2H; H-4), 7.43 (d,  $^3J(\text{H,H})$  = 7.9 Hz, 2H; H-4), 7.10 (dd,  $^3J(\text{H,H})$  = 7.9 Hz,  $^4J(\text{H,H})$  = 1.8 Hz, 2H; H-3), 7.07 (dd,  $^3J(\text{H,H})$  = 7.9 Hz,  $^4J(\text{H,H})$  = 1.8 Hz, 2H; H-3), 3.03 (t,  $^3J(\text{H,H})$  = 7.3 Hz, 2H; BrCH<sub>2</sub>), 2.07 (vq,  $^3J(\text{H,H})$  = 7.5 Hz, 2H; BCCH<sub>2</sub>), 2.04 (br, 1H; BHB), 1.60 (vquint,  $^3J(\text{H,H})$  = 7.3 Hz, 2H; BrCCH<sub>2</sub>), 1.45 (s, 18H; CH<sub>3</sub>), 1.43 (s, 18H; CH<sub>3</sub>), 1.15 (vquint,  $^3J(\text{H,H})$  = 7.3 Hz, 2H; BrCCCH<sub>2</sub>), 0.93 (td,  $^3J(\text{H,H})$  = 7.6 Hz,  $^3J(\text{H,H})$  = 2.3 Hz, 1H; BCH).

$^{11}\text{B NMR}$  (160.5 MHz, THF- $d_8$ ):  $\delta$  = -12.9 (br).

$^{13}\text{C}\{^1\text{H}\}$  NMR (125.8 MHz, THF- $d_8$ ):  $\delta$  = 159.4 (br; C-6), 156.6 (br; C-6), 148.2 (C-5), 147.3 (C-5), 146.5 (C-2), 146.1 (C-2), 129.8 (C-1), 127.8 (C-1), 121.8 (C-3), 121.7 (C-3), 117.8 (C-4), 117.7 (C-4), 35.3 (CCH<sub>3</sub>), 35.2 (BrCH<sub>2</sub>, CCH<sub>3</sub>), 34.3 (BrCCH<sub>2</sub>), 33.7 (BrCCCH<sub>2</sub>), 32.7 (CH<sub>3</sub>), 29.5 (BCCH<sub>2</sub>), 20.4 (br; BCH).

*Li[15<sup>C6,Cl</sup>]*

**<sup>1</sup>H NMR (500.2 MHz, THF-*d*<sub>8</sub>):**  $\delta$  = 8.17 (d, <sup>4</sup>*J*(H,H) = 1.8 Hz, 2H; H-1), 8.01 (d, <sup>4</sup>*J*(H,H) = 1.8 Hz, 2H; H-1), 7.45 (d, <sup>3</sup>*J*(H,H) = 7.9 Hz, 2H; H-4), 7.42 (d, <sup>3</sup>*J*(H,H) = 7.9 Hz, 2H; H-4), 7.09 (dd, <sup>3</sup>*J*(H,H) = 7.9 Hz, <sup>4</sup>*J*(H,H) = 1.8 Hz, 2H; H-3), 7.06 (dd, <sup>3</sup>*J*(H,H) = 7.9 Hz, <sup>4</sup>*J*(H,H) = 1.8 Hz, 2H; H-3), 3.15 (t, <sup>3</sup>*J*(H,H) = 7.1 Hz, 2H; ClCH<sub>2</sub>), 2.05 (vq, <sup>3</sup>*J*(H,H) = 7.5 Hz, 2H; BCCH<sub>2</sub>), 2.04 (br, 1H; BHB), 1.45 (s, 18H; CH<sub>3</sub>), 1.44 (vquint, <sup>3</sup>*J*(H,H) = 7.2 Hz, 2H; ClCCH<sub>2</sub>), 1.43 (s, 18H; CH<sub>3</sub>), 1.16 (vquint, <sup>3</sup>*J*(H,H) = 7.5 Hz, 2H; ClCCCH<sub>2</sub>), 1.07 (vquint, <sup>3</sup>*J*(H,H) = 7.3 Hz, 2H; BCCCH<sub>2</sub>), 0.94 (td, <sup>3</sup>*J*(H,H) = 7.6 Hz, <sup>4</sup>*J*(H,H) = 2.6 Hz, 1H; BCH).

**<sup>11</sup>B NMR (160.5 MHz, THF-*d*<sub>8</sub>):**  $\delta$  = -14.0 (br).

**<sup>13</sup>C{<sup>1</sup>H} NMR (125.8 MHz, THF-*d*<sub>8</sub>):**  $\delta$  = 159.6 (br; C-6), 156.8 (br; C-6), 148.2 (C-5), 147.4 (C-5), 146.4 (C-2), 146.0 (C-2), 129.9 (C-1), 127.8 (C-1), 121.6 (C-3), 121.6 (C-3), 117.7 (C-4), 117.6 (C-4), 45.8 (ClCH<sub>2</sub>), 35.3 (CCH<sub>3</sub>), 35.2 (CCH<sub>3</sub>), 34.4 (BCCCH<sub>2</sub>), 33.8 (ClCCH<sub>2</sub>), 32.7 (CH<sub>3</sub>), 30.2 (BCCH<sub>2</sub>), 27.7 (ClCCCH<sub>2</sub>), 20.6 (br; BCH).

*Li[15<sup>C6,Br</sup>]*

**<sup>1</sup>H NMR (500.2 MHz, THF-*d*<sub>8</sub>):**  $\delta$  = 8.16 (d, <sup>4</sup>*J*(H,H) = 1.8 Hz, 2H; H-1), 8.01 (d, <sup>4</sup>*J*(H,H) = 1.8 Hz, 2H; H-1), 7.46 (d, <sup>3</sup>*J*(H,H) = 7.9 Hz, 2H; H-4), 7.43 (d, <sup>3</sup>*J*(H,H) = 7.9 Hz, 2H; H-4), 7.10 (dd, <sup>3</sup>*J*(H,H) = 7.9 Hz, <sup>4</sup>*J*(H,H) = 1.8 Hz, 2H; H-3), 7.07 (dd, <sup>3</sup>*J*(H,H) = 7.9 Hz, <sup>4</sup>*J*(H,H) = 1.8 Hz, 2H; H-3), 3.05 (t, <sup>3</sup>*J*(H,H) = 7.2 Hz, 2H; BrCH<sub>2</sub>), 2.05 (vq, <sup>3</sup>*J*(H,H) = 7.5 Hz, 2H; BCCH<sub>2</sub>), 2.03 (br, 1H; BHB), 1.54 (vquint, <sup>3</sup>*J*(H,H) = 7.3 Hz, 2H; BrCCH<sub>2</sub>), 1.45 (s, 18H; CH<sub>3</sub>), 1.44 (s, 18H; CH<sub>3</sub>), 1.17 (vquint, <sup>3</sup>*J*(H,H) = 7.3 Hz, 2H; BrCCCH<sub>2</sub>), 1.07 (vquint, <sup>3</sup>*J*(H,H) = 7.3 Hz, 2H; BCCCH<sub>2</sub>), 0.94 (td, <sup>3</sup>*J*(H,H) = 7.5 Hz, <sup>3</sup>*J*(H,H) = 2.2 Hz, 1H; BCH).

**<sup>11</sup>B NMR (160.5 MHz, THF-*d*<sub>8</sub>):**  $\delta$  = -13.6 (br).

**<sup>13</sup>C{<sup>1</sup>H} NMR (125.8 MHz, THF-*d*<sub>8</sub>):**  $\delta$  = 159.5 (br; C-6), 156.8 (br; C-6), 148.2 (C-5), 147.3 (C-5), 146.5 (C-2), 146.1 (C-2), 129.9 (C-1), 127.9 (C-1), 121.7 (C-3), 121.7 (C-3), 117.8 (C-4), 117.7 (C-4), 35.3 (CCH<sub>3</sub>), 35.2 (CCH<sub>3</sub>), 34.8 (BrCH<sub>2</sub>), 34.2 (BCCCH<sub>2</sub>), 34.1 (BrCCH<sub>2</sub>), 32.7 (CH<sub>3</sub>, CH<sub>3</sub>), 30.2 (BCCH<sub>2</sub>), 29.0 (BrCCCH<sub>2</sub>), 20.7 (br; BCH).

## 2. Plots of NMR spectra

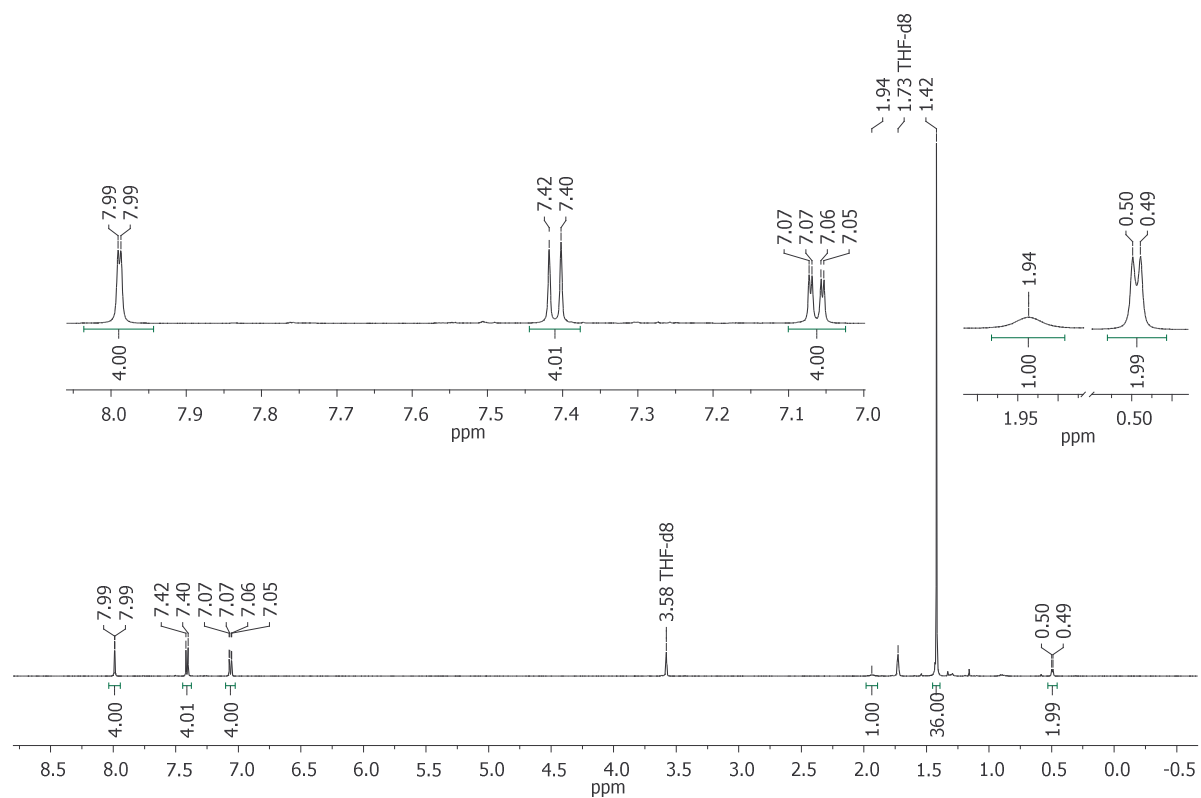

Figure S17:  $^1\text{H}$  NMR spectrum of  $\text{Li}[\mathbf{2}]$  (500.2 MHz,  $\text{THF-}d_8$ ).

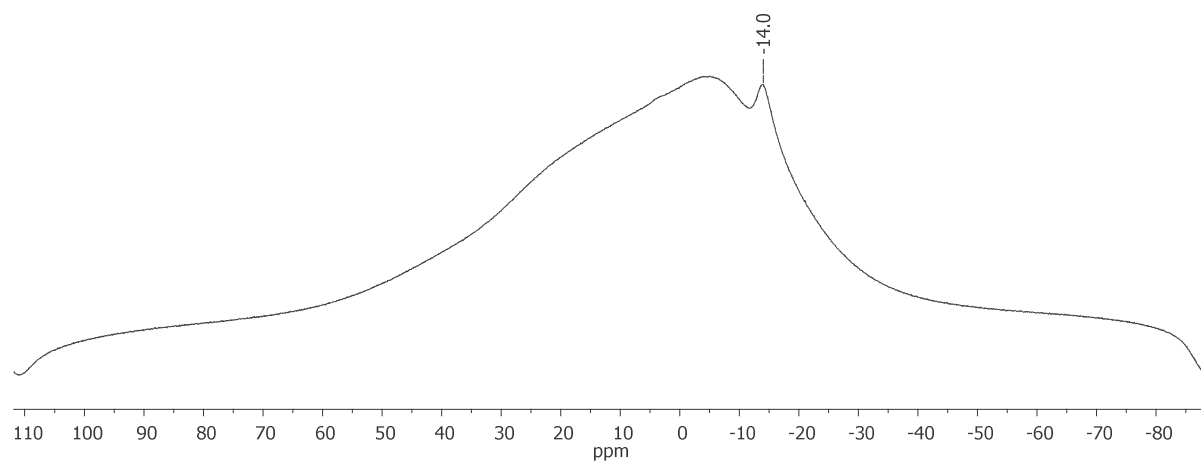

Figure S18:  $^{11}\text{B}$  NMR spectrum of  $\text{Li}[\mathbf{2}]$  (160.5 MHz,  $\text{THF-}d_8$ ).

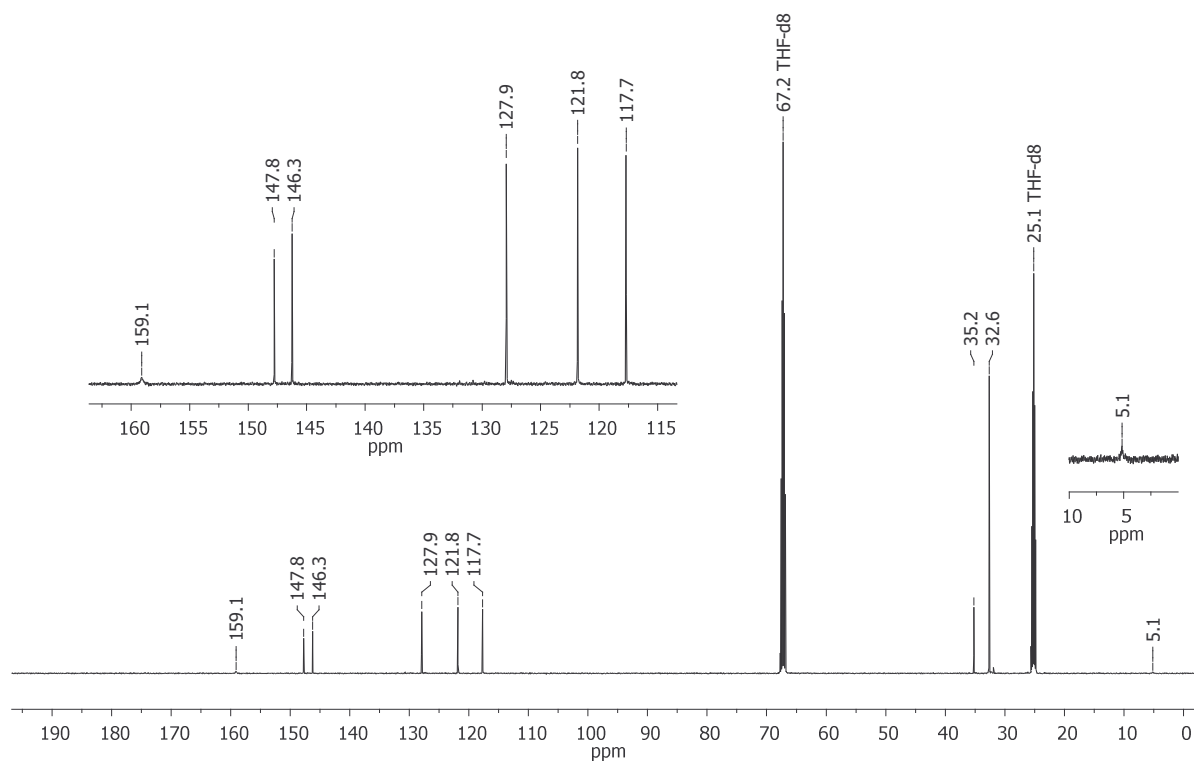

Figure S19:  $^{13}\text{C}\{^1\text{H}\}$  NMR spectrum of Li[2] (125.8 MHz, THF- $d_8$ ).

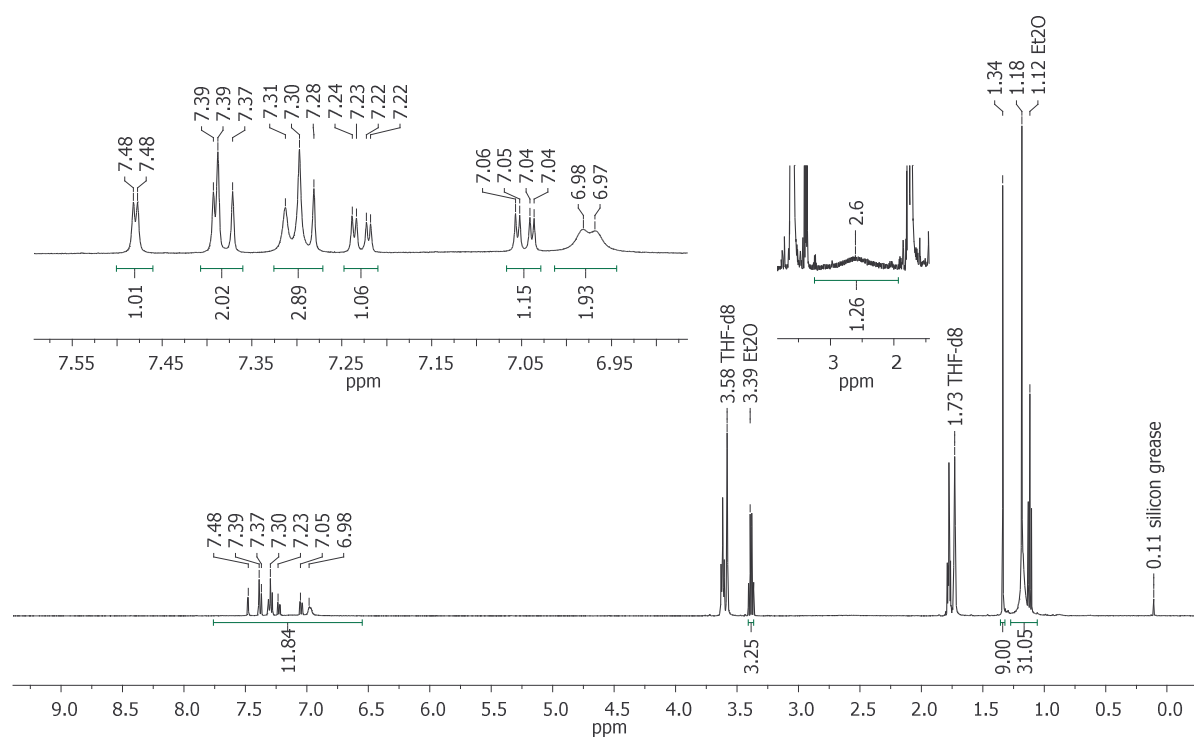

Figure S20:  $^1\text{H}$  NMR spectrum of Li[7] (500.2 MHz, THF- $d_8$ ).



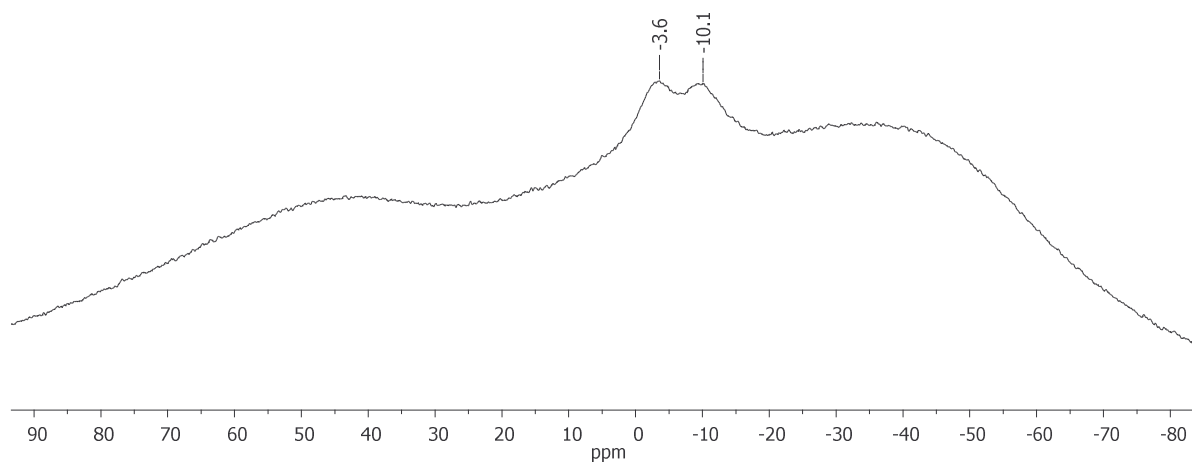

Figure S21:  $^{11}\text{B}$  NMR spectrum of Li[7] (96.3 MHz, THF- $d_8$ ).

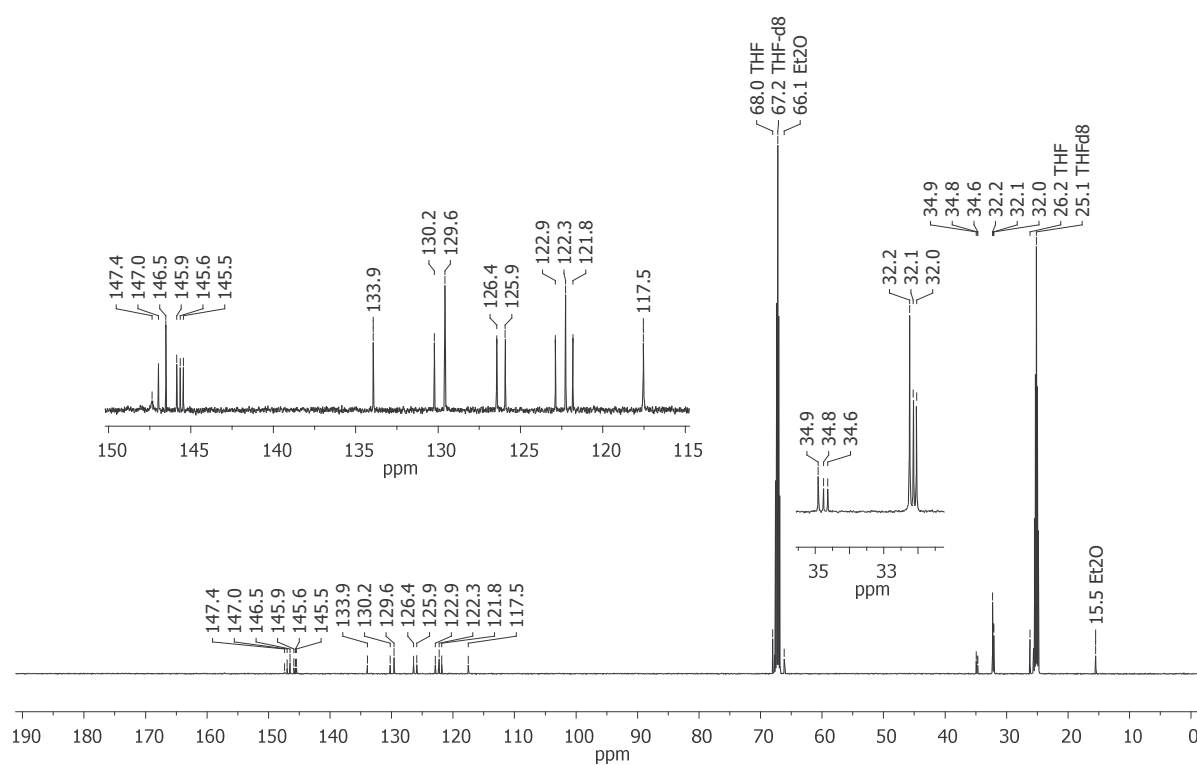

Figure S22:  $^{13}\text{C}\{^1\text{H}\}$  NMR spectrum of Li[7] (125.8 MHz, THF- $d_8$ ).

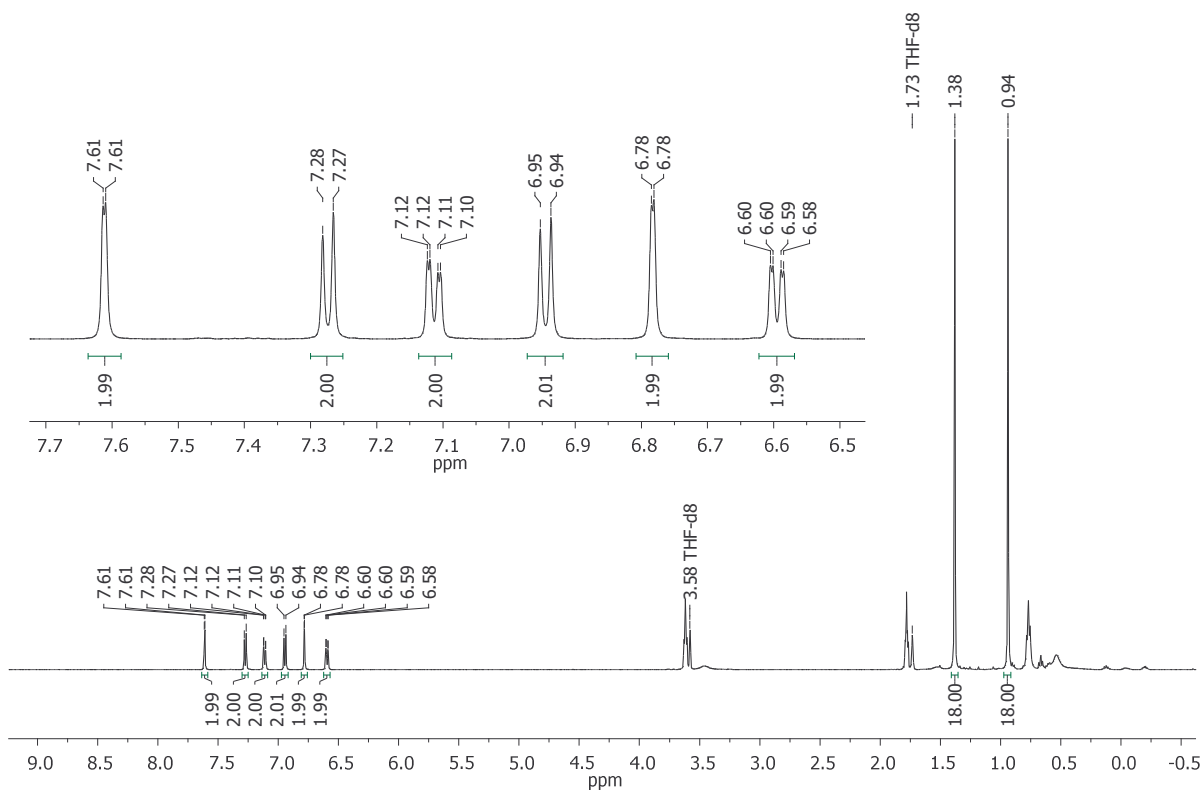

Figure S23:  $^1\text{H}$  NMR spectrum of  $\text{Li}[\mathbf{10}]$  (500.2 MHz,  $\text{THF-d}_8$ ).

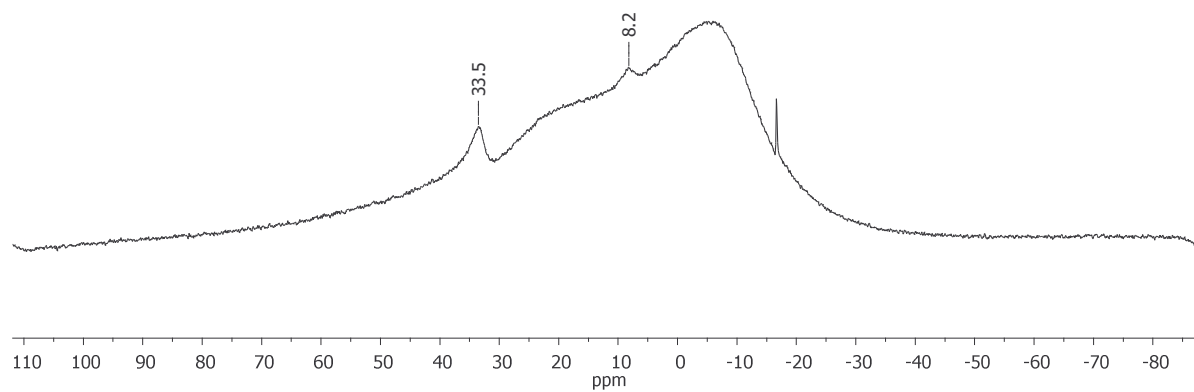

Figure S24:  $^{11}\text{B}$  NMR spectrum of  $\text{Li}[\mathbf{10}]$  (96.3 MHz,  $\text{THF-d}_8$ ).

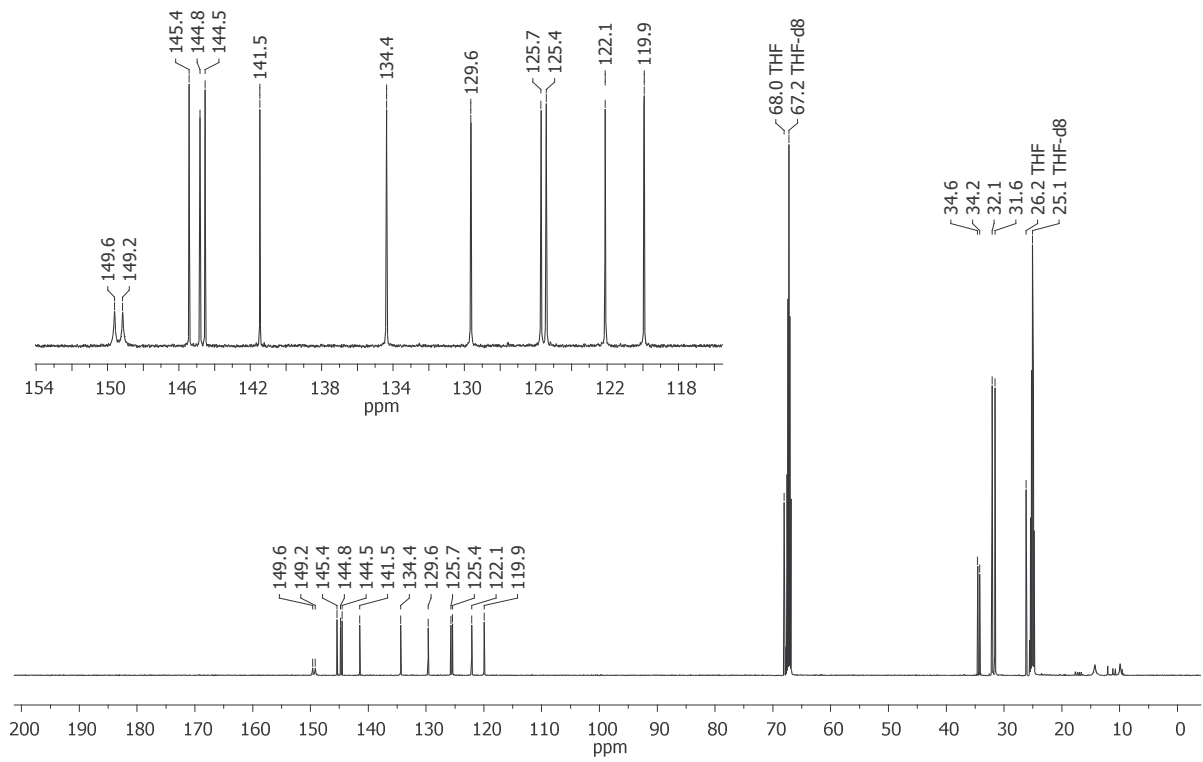

Figure S25:  $^{13}\text{C}\{^1\text{H}\}$  NMR spectrum of Li[10] (125.8 MHz,  $\text{THF-}d_8$ ).

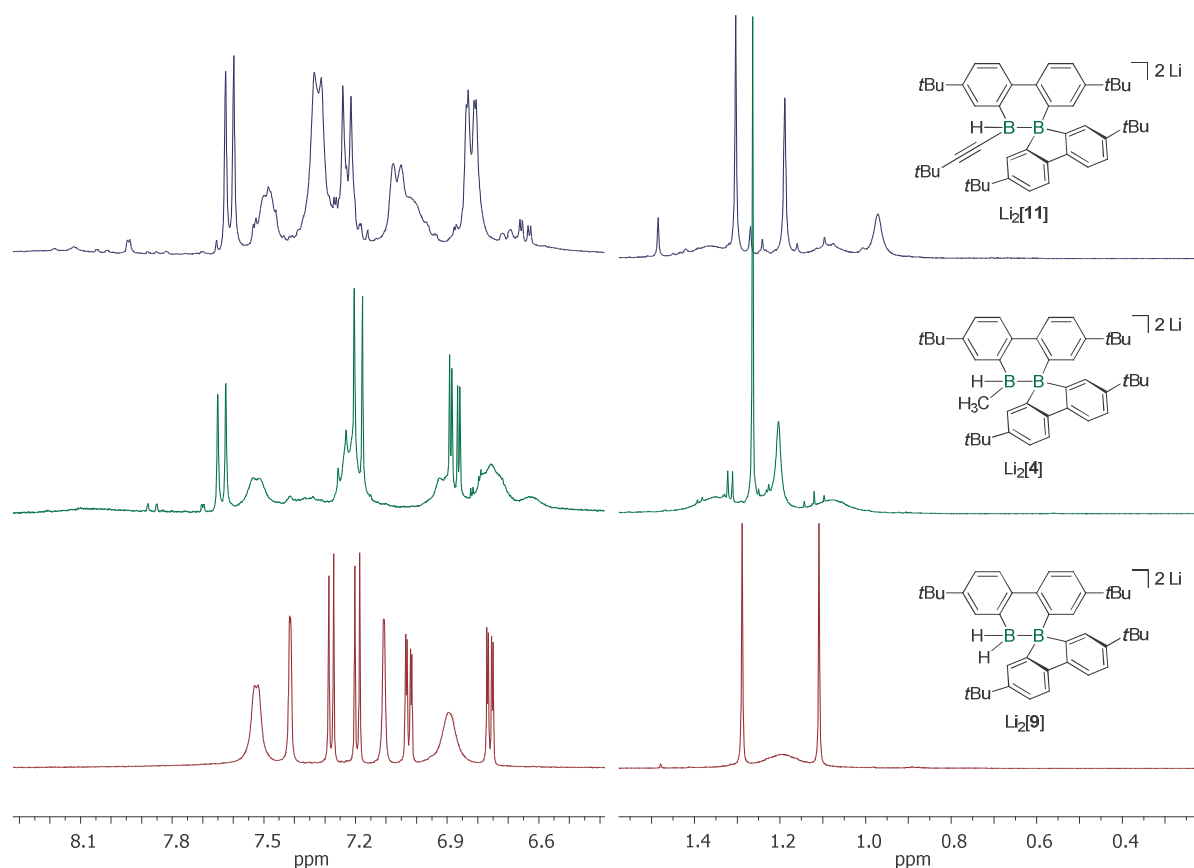

Figure S26:  $^1\text{H}$  NMR spectra of  $\text{Li}_2[\mathbf{11}]$  (top; 300.0 MHz),  $\text{Li}_2[\mathbf{4}]$  (middle; 300.0 MHz), and  $\text{Li}_2[\mathbf{9}]$  (bottom; 500.2 MHz) in  $\text{THF-}d_8$ . Aryl and alkyl regions are scaled differently. In the case of  $\text{Li}_2[\mathbf{9}]$ , the poor resolution of some signals in the aromatic and aliphatic spectral region originates from a dynamic behavior of the system in solution, which arises from conformational changes of the twisted  $\text{B}_2\text{C}_4$  ring and/or from an association-dissociation equilibrium between the cations and the anions.<sup>S5</sup> In the cases of  $\text{Li}_2[\mathbf{4}]$  and  $\text{Li}_2[\mathbf{11}]$ , the phenomenon is even more pronounced due to further symmetry breaking by the boron-bonded organyl substituents.

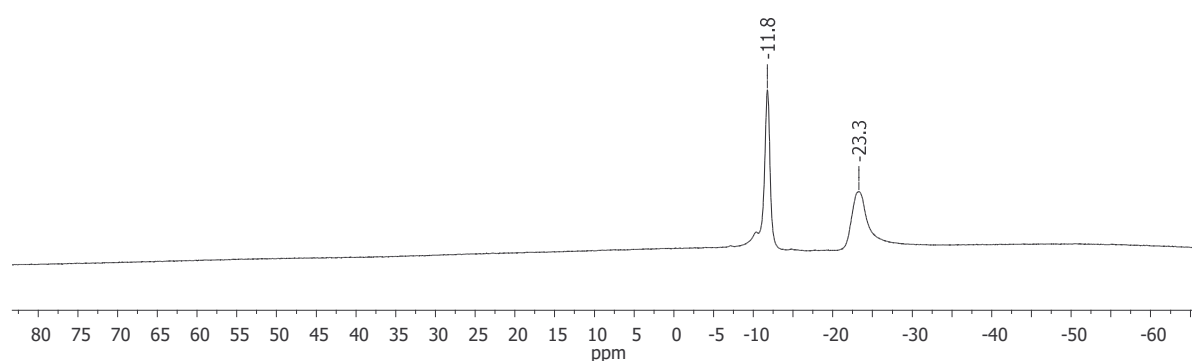

Figure S27:  $^{11}\text{B}$  NMR spectrum of  $\text{Li}_2[\mathbf{11}]$  (96.3 MHz,  $\text{THF-}d_8$ ).

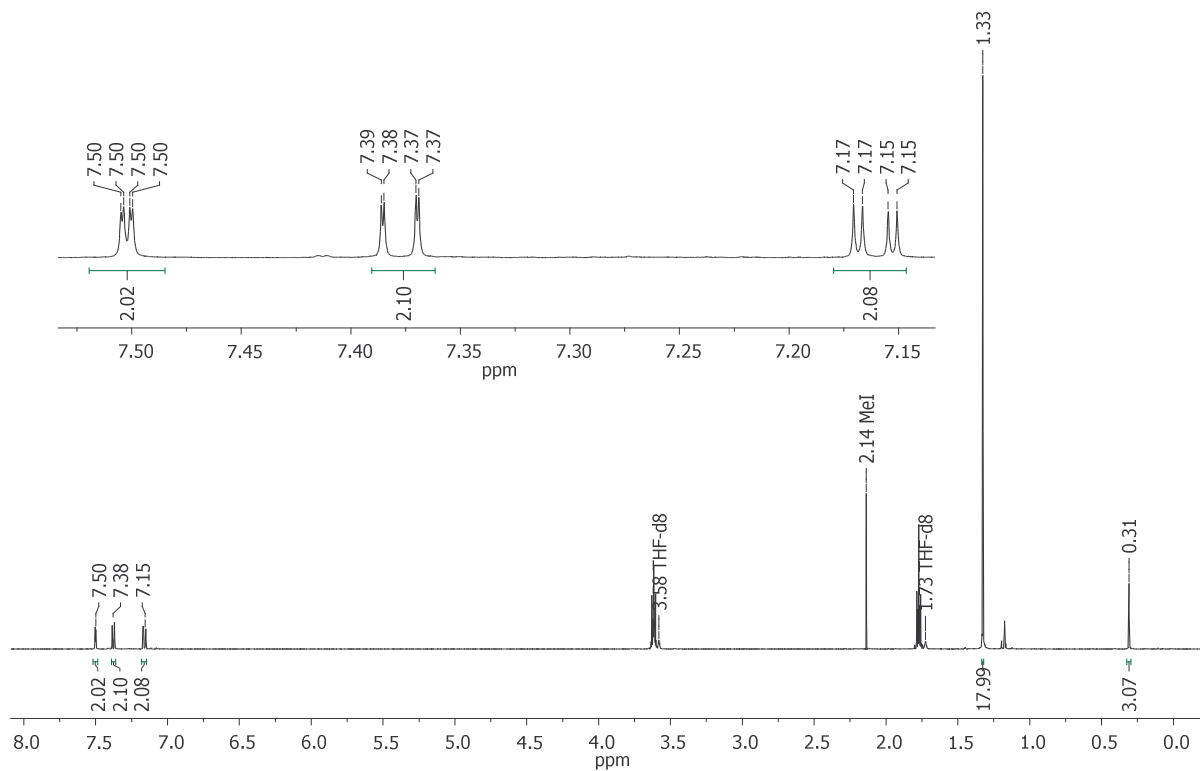

Figure S28:  $^1\text{H}$  NMR spectrum of **13** (500.2 MHz,  $\text{THF-d}_8$ ).

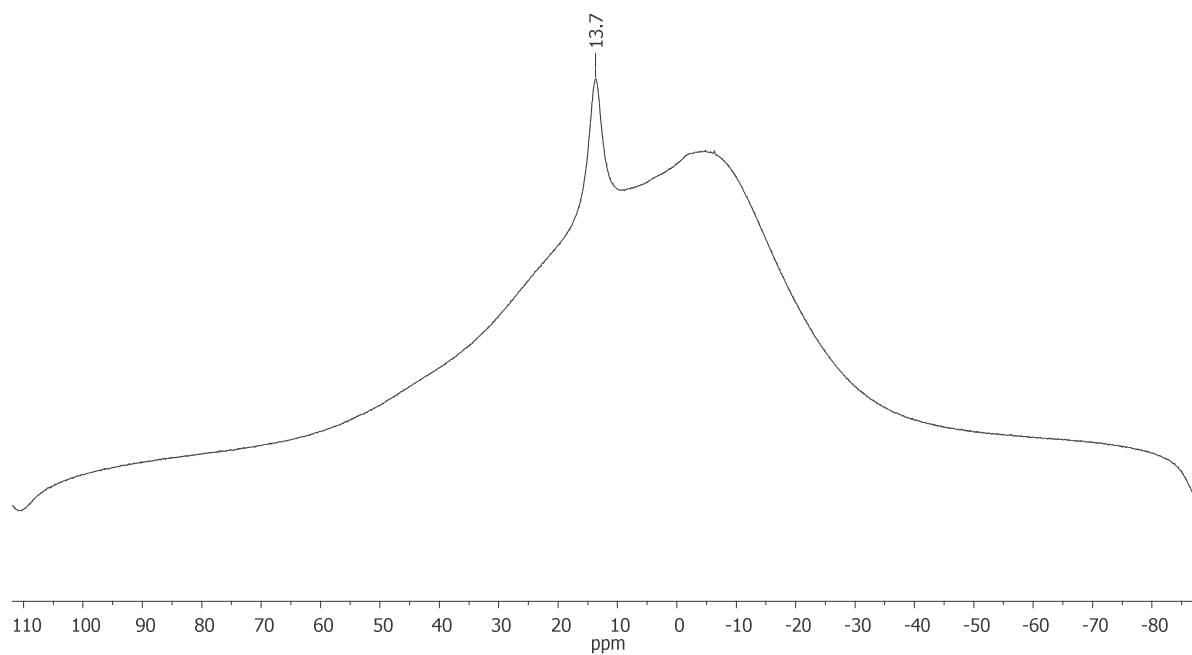

Figure S29:  $^{11}\text{B}$  NMR spectrum of **13** (160.5 MHz,  $\text{THF-d}_8$ ).

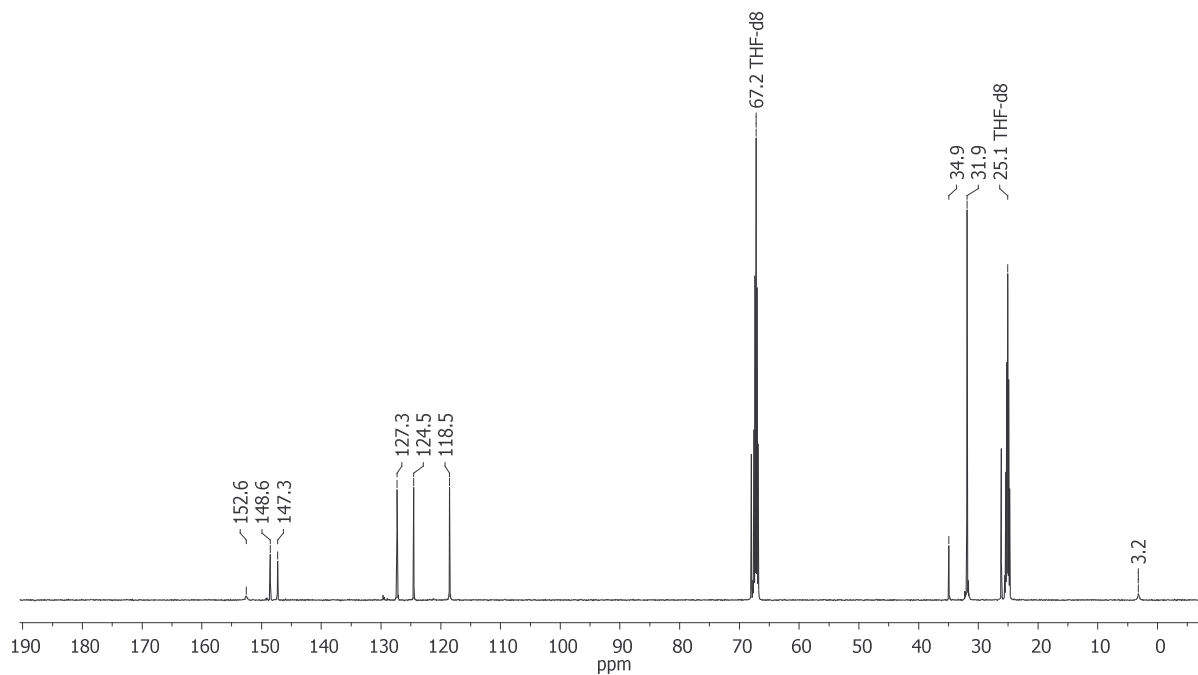

Figure S30:  $^{13}\text{C}\{^1\text{H}\}$  NMR spectrum of **13** (125.8 MHz, THF- $d_8$ ).

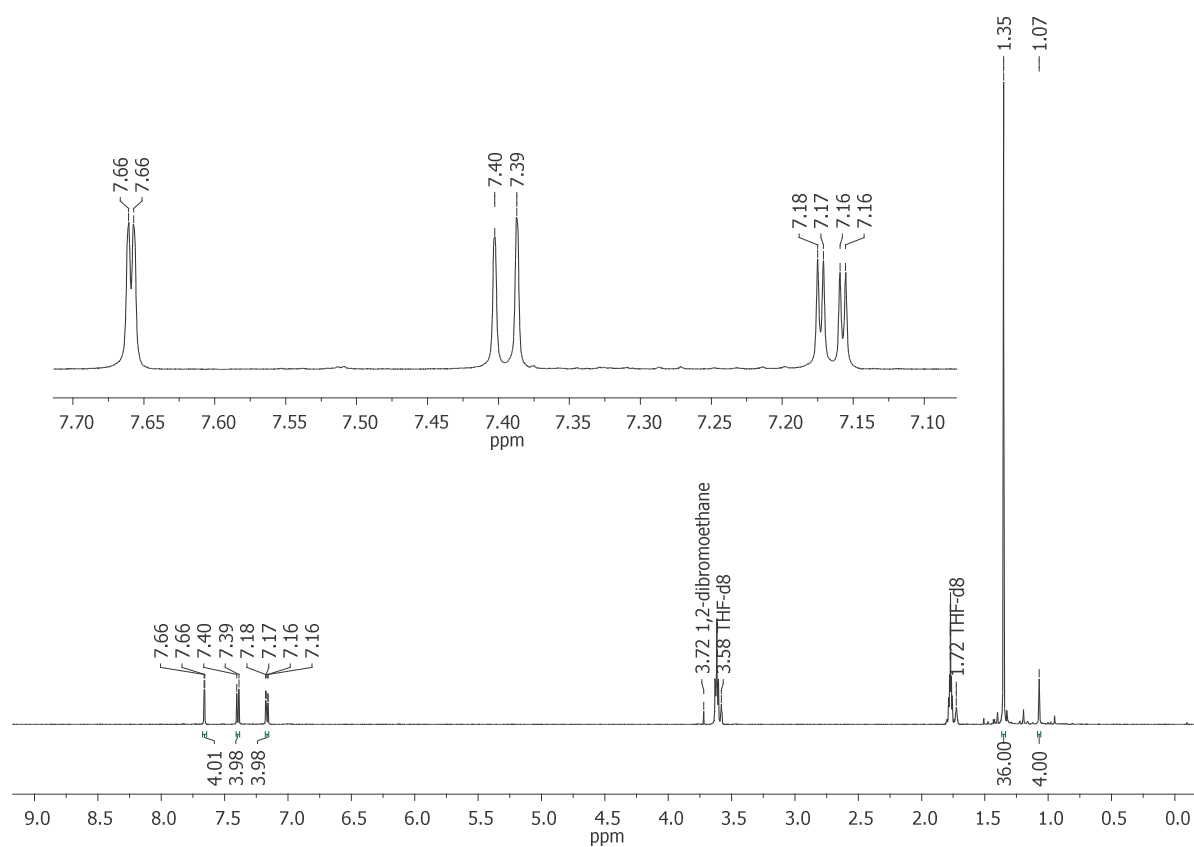

Figure S31:  $^1\text{H}$  NMR spectrum of **14** (500.2 MHz, THF- $d_8$ ).

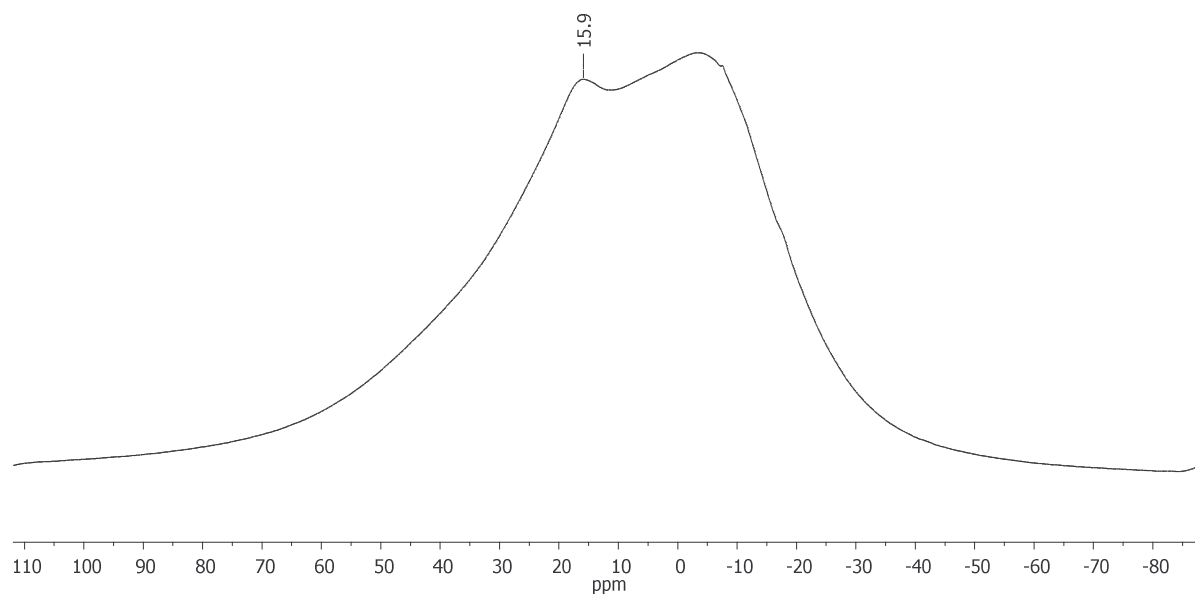

Figure S32:  $^{11}\text{B}$  NMR spectrum of  $14^{\text{C}2}$  (160.5 MHz,  $\text{THF-}d_8$ ).

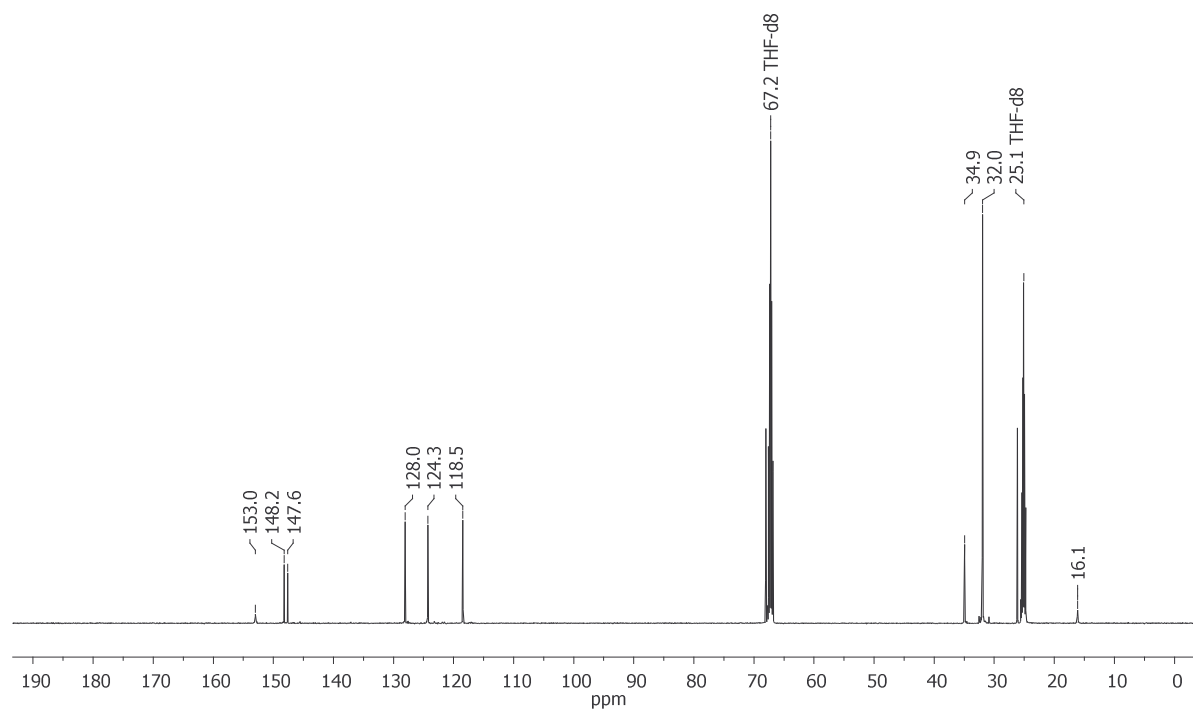

Figure S33:  $^{13}\text{C}\{^1\text{H}\}$  NMR spectrum of  $14^{\text{C}2}$  (125.8 MHz,  $\text{THF-}d_8$ ).

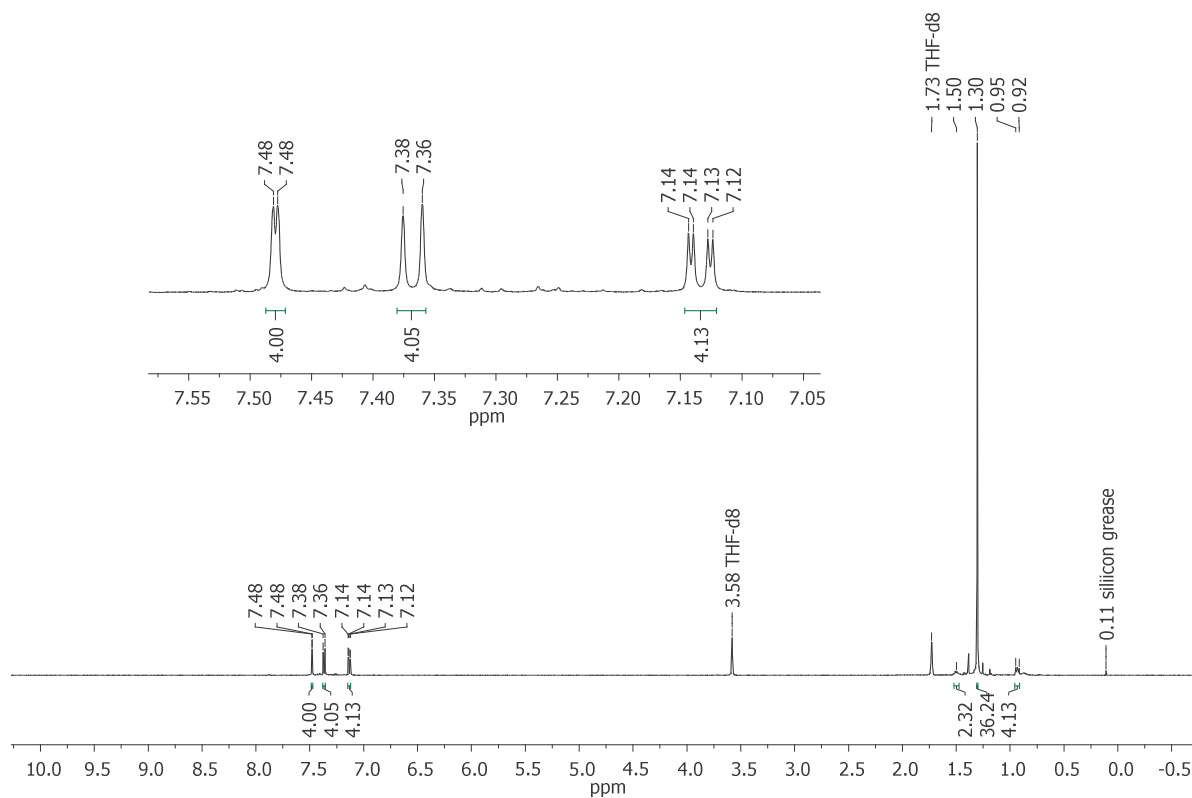

Figure S34:  $^1\text{H}$  NMR spectrum of  $14^{\text{C}3}$  (500.2 MHz,  $\text{THF-d}_8$ ).

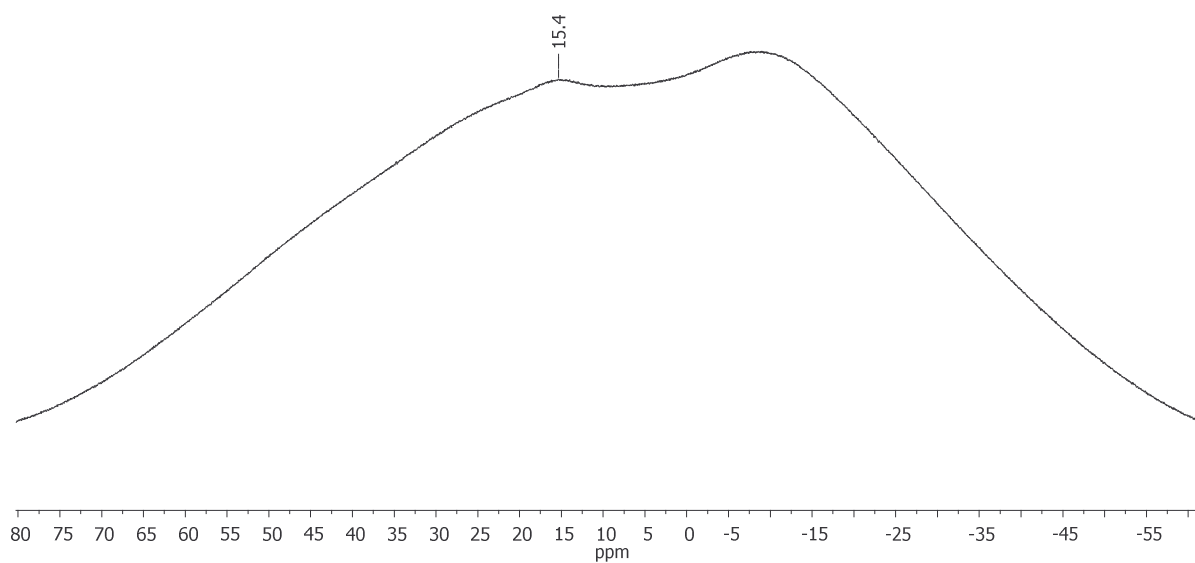

Figure S35:  $^{11}\text{B}$  NMR spectrum of  $14^{\text{C}3}$  (160.5 MHz,  $\text{THF-d}_8$ ).



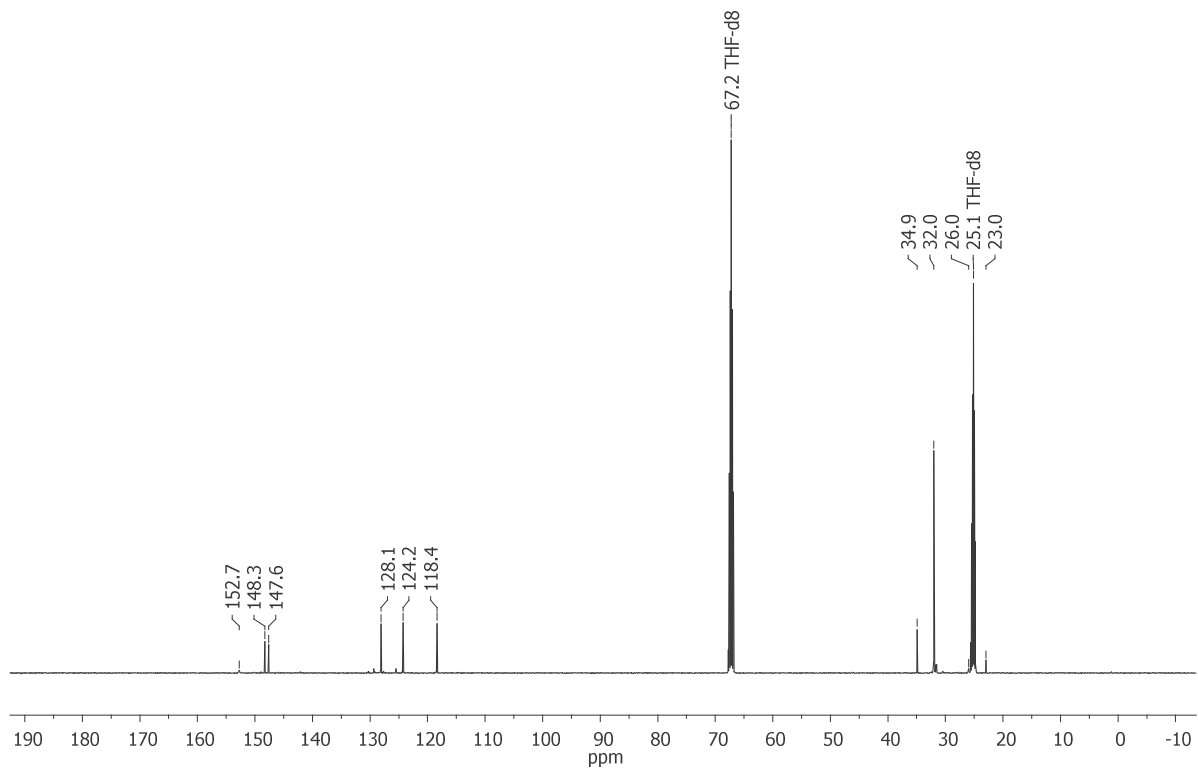

Figure S36:  $^{13}\text{C}\{^1\text{H}\}$  NMR spectrum of  $14^{\text{C}3}$  (125.8 MHz, THF- $d_8$ ).

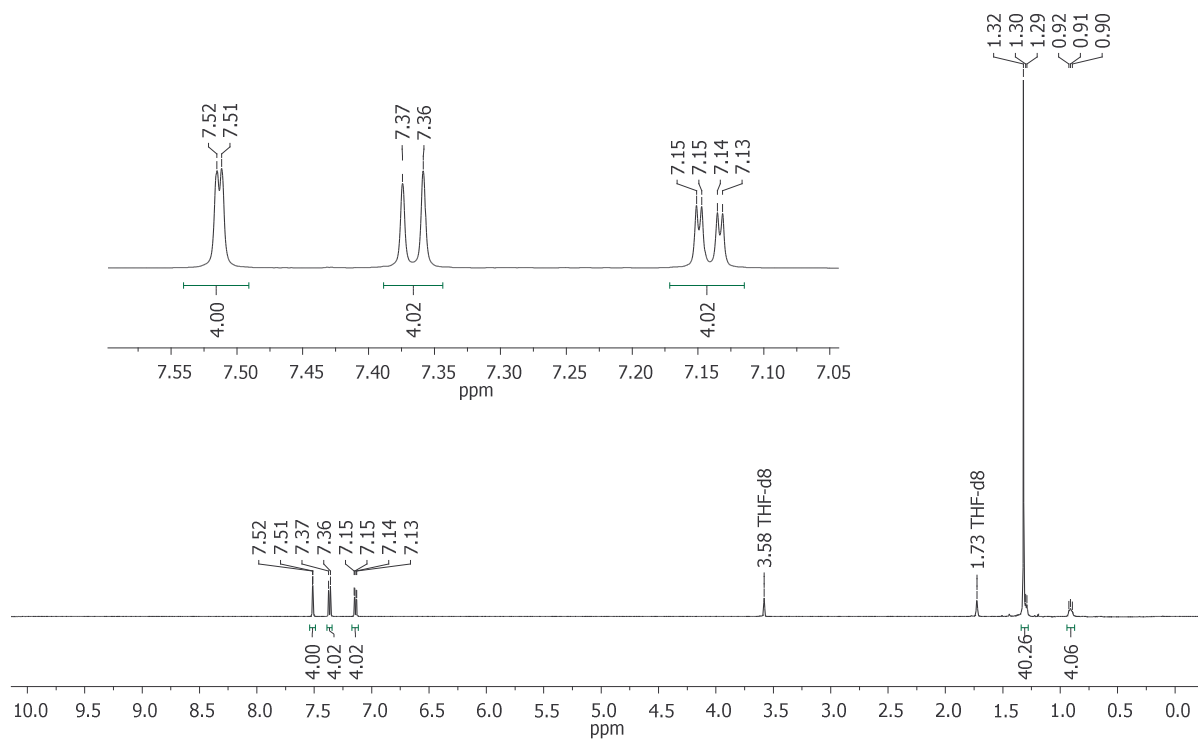

Figure S37:  $^1\text{H}$  NMR spectrum of  $14^{\text{C}4}$  (500.2 MHz, THF- $d_8$ ).

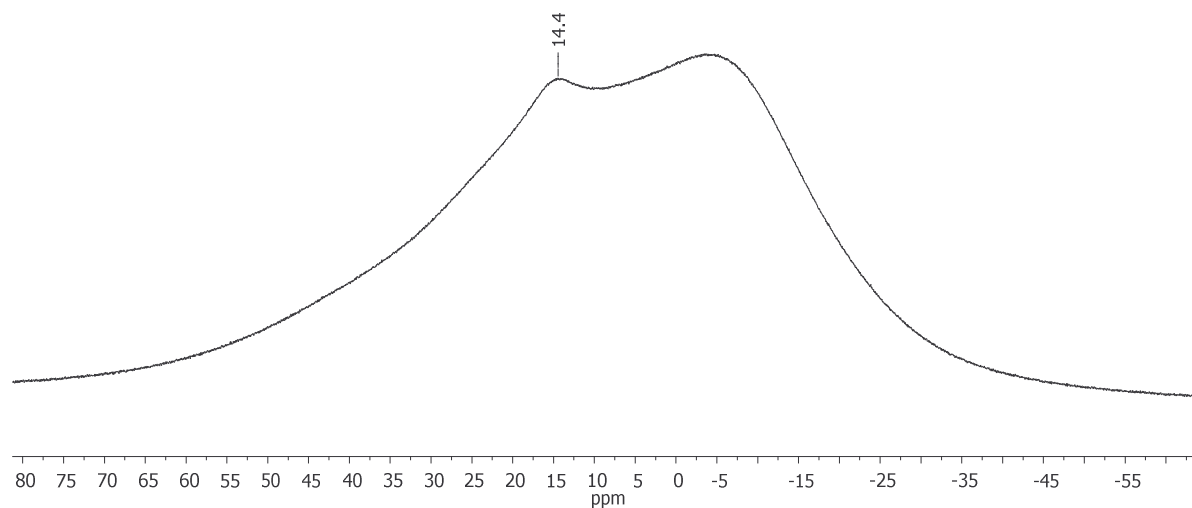

Figure S38:  $^{11}\text{B}$  NMR spectrum of  $14^{\text{C4}}$  (160.5 MHz,  $\text{THF-d}_8$ ).

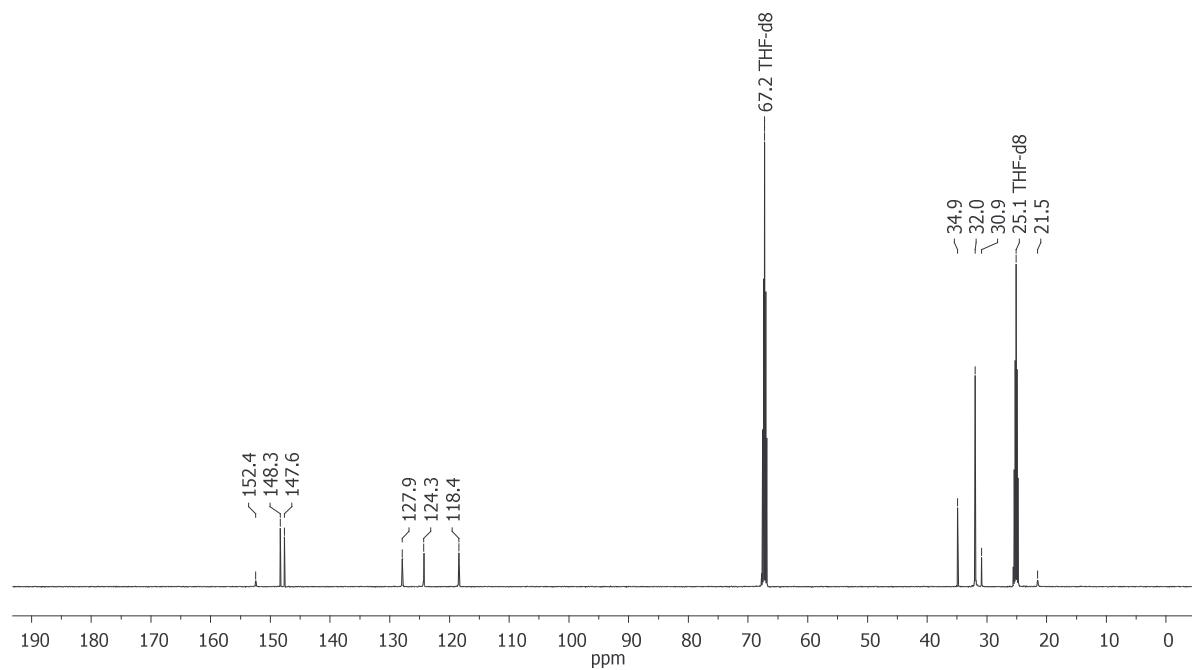

Figure S39:  $^{13}\text{C}\{^1\text{H}\}$  NMR spectrum of  $14^{\text{C4}}$  (125.8 MHz,  $\text{THF-d}_8$ ).

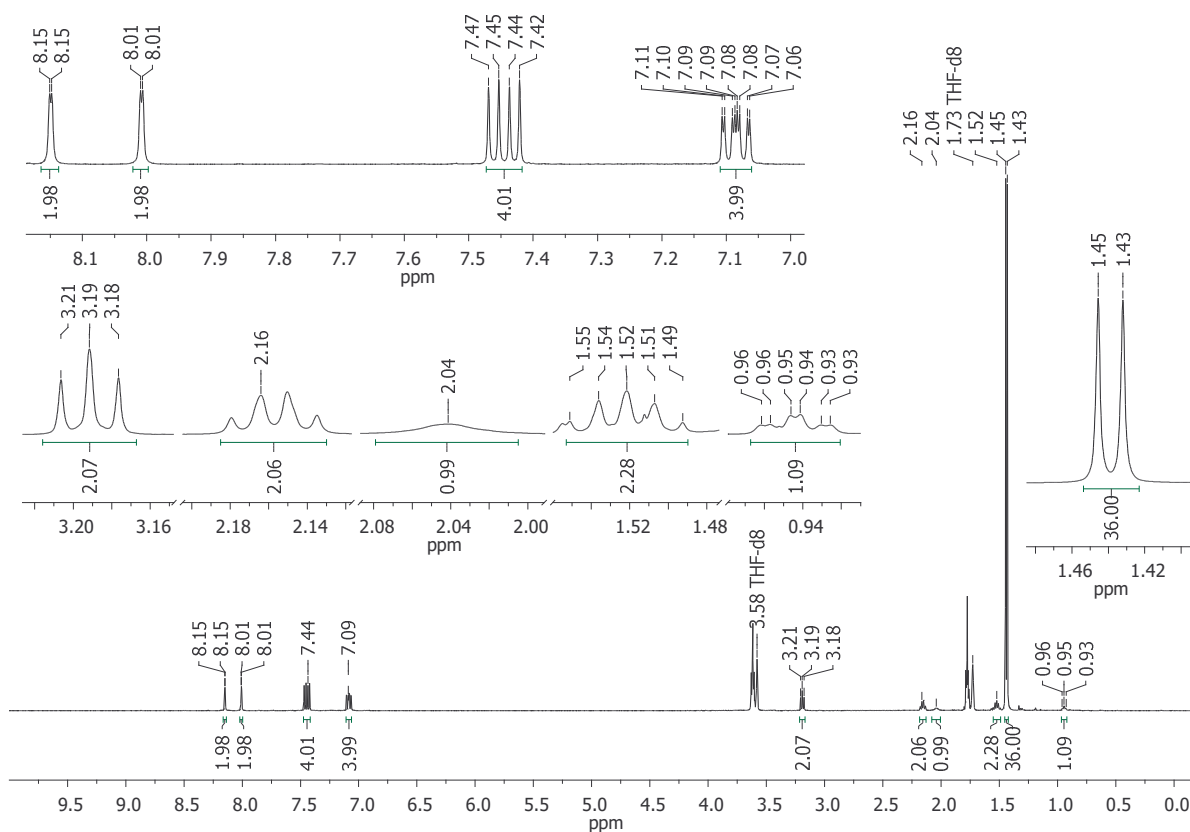

Figure S40:  $^1\text{H}$  NMR spectrum of  $\text{Li}[\mathbf{15}^{\text{C4,Cl}}]$  (500.2 MHz,  $\text{THF-}d_8$ ).

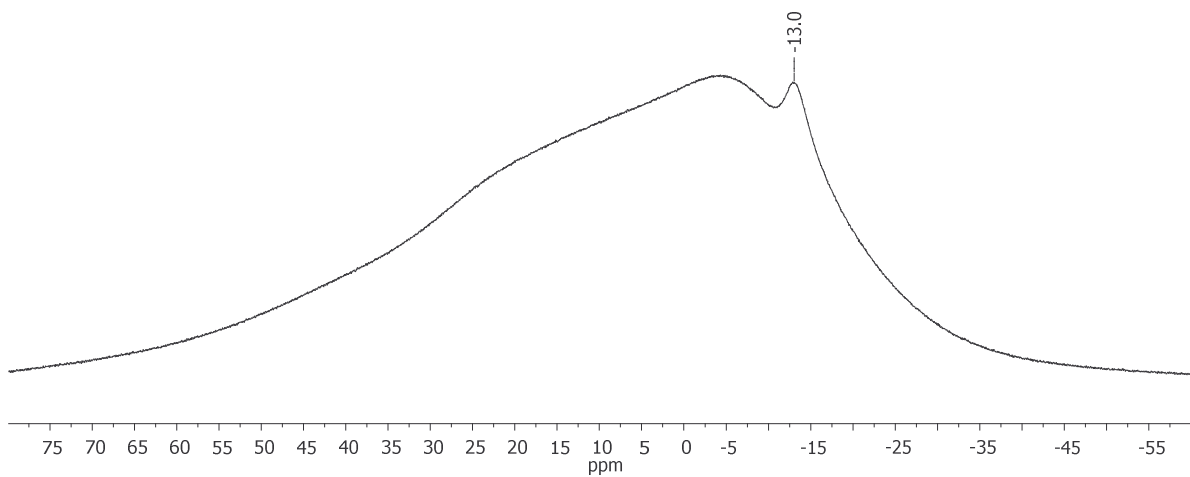

Figure S41:  $^{11}\text{B}$  NMR spectrum of  $\text{Li}[\mathbf{15}^{\text{C4,Cl}}]$  (160.5 MHz,  $\text{THF-}d_8$ ).

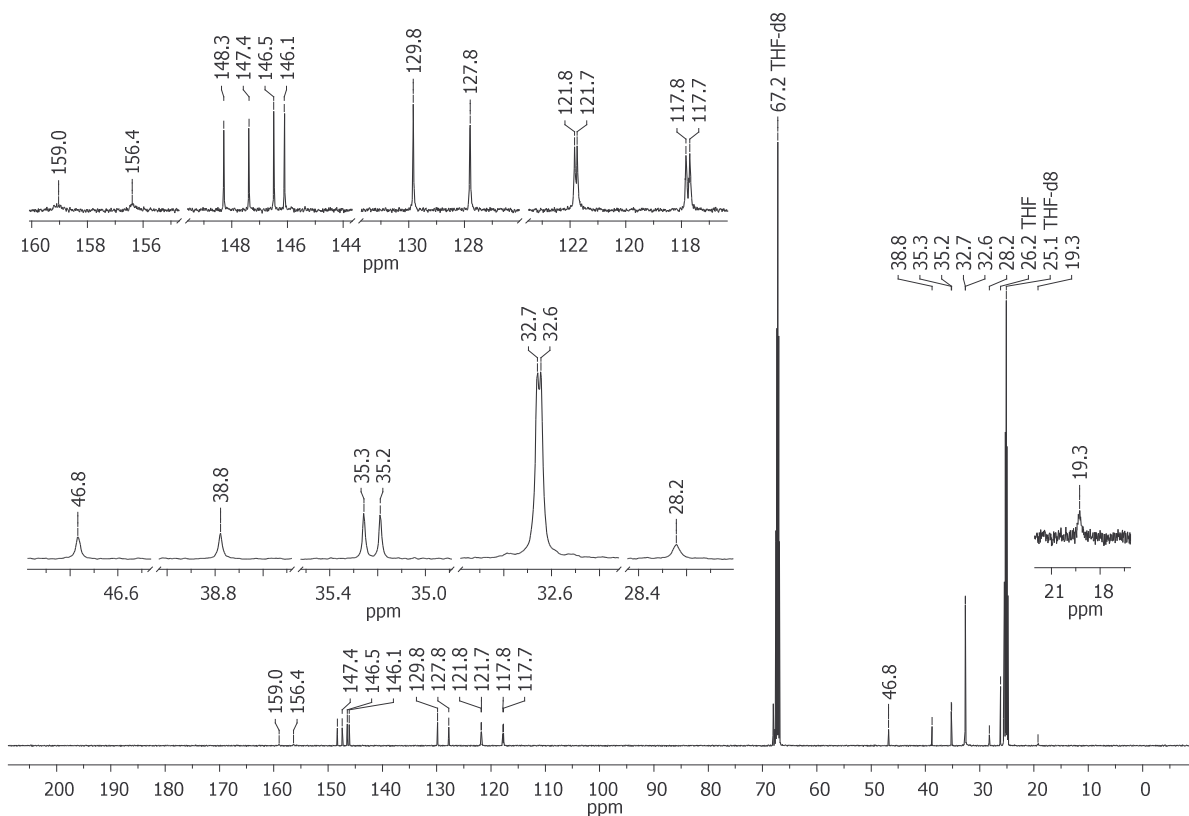

Figure S42:  $^{13}\text{C}\{^1\text{H}\}$  NMR spectrum of  $\text{Li}[\text{15}^{\text{C}}_4\text{Cl}]$  (125.8 MHz,  $\text{THF-d}_8$ ).

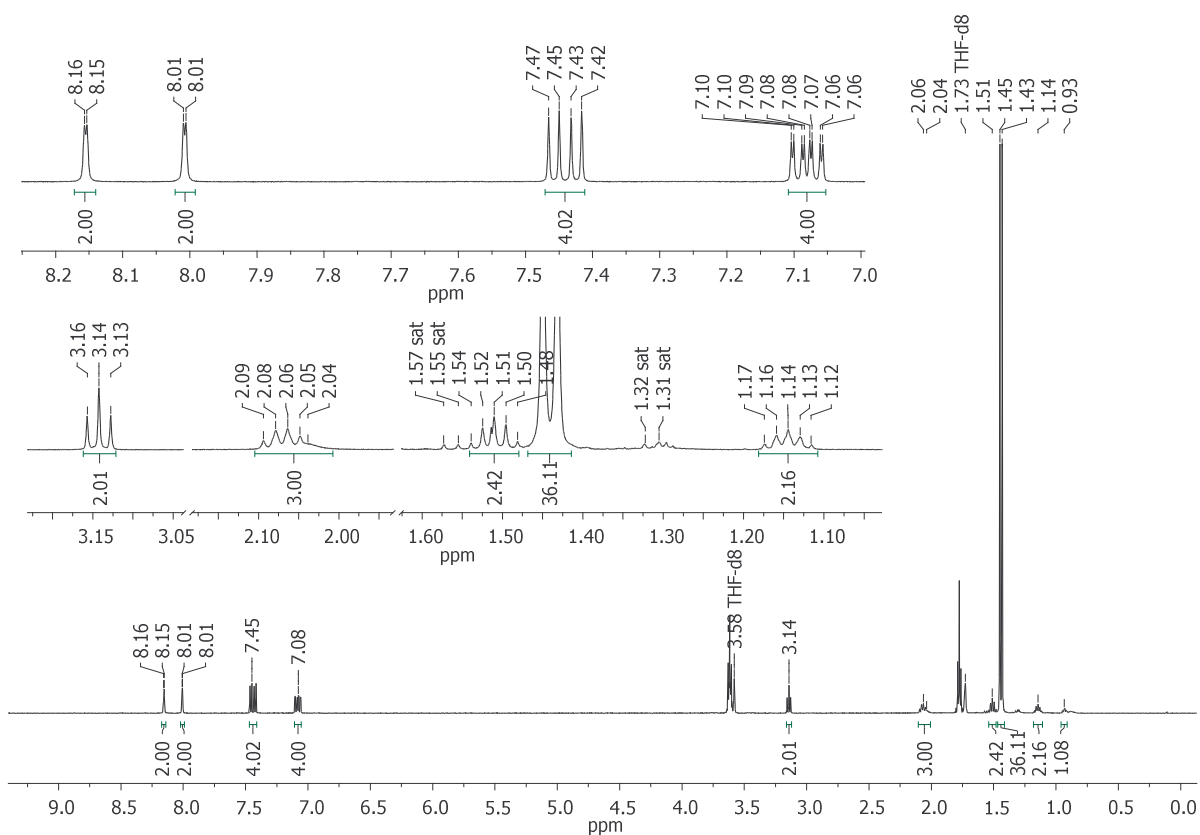

Figure S43:  $^1\text{H}$  NMR spectrum of  $\text{Li}[\text{15}^{\text{C}}_5\text{Cl}]$  (500.2 MHz,  $\text{THF-d}_8$ ; sat =  $^{13}\text{C}$  satellite of a  $\text{CH}_3$  signal).

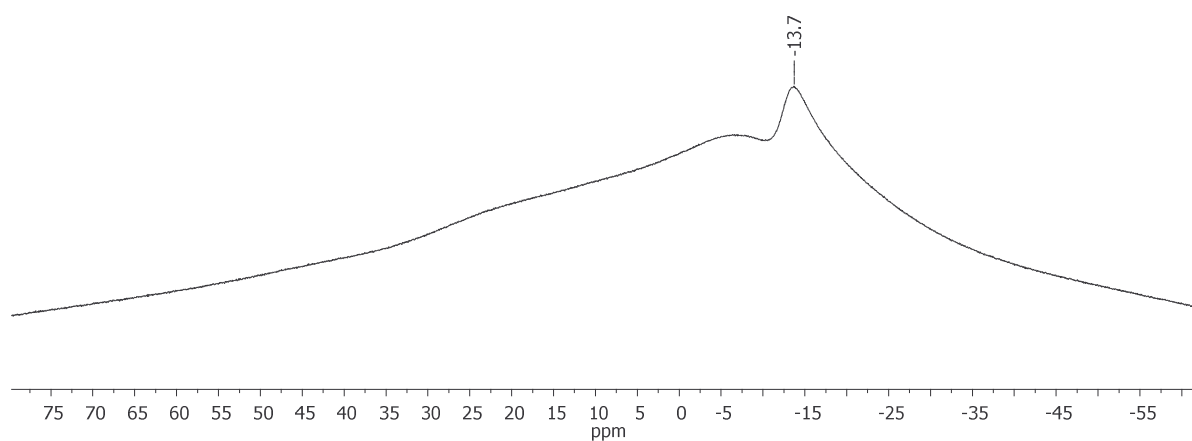

Figure S44:  $^{11}\text{B}$  NMR spectrum of  $\text{Li}[\mathbf{15}^{\text{C5,Cl}}]$  (160.5 MHz,  $\text{THF-d}_8$ ).

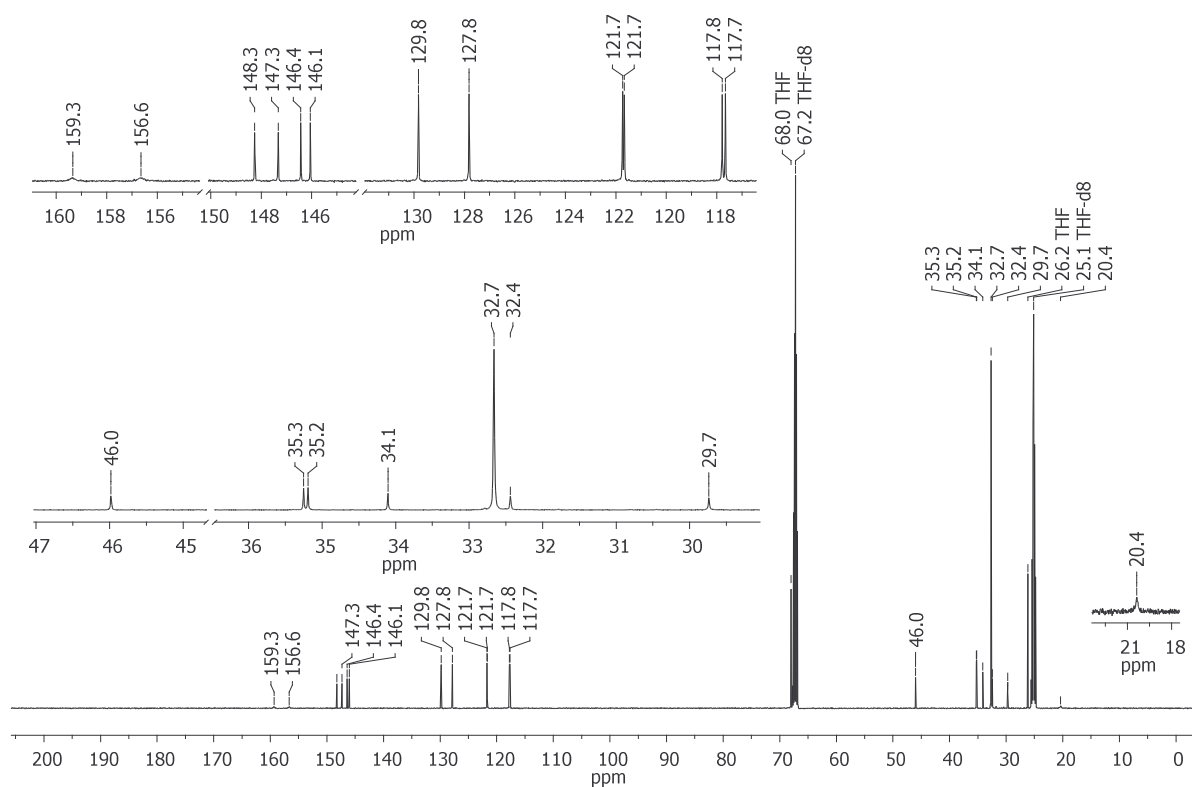

Figure S45:  $^{13}\text{C}\{^1\text{H}\}$  NMR spectrum of  $\text{Li}[\mathbf{15}^{\text{C5,Cl}}]$  (125.8 MHz,  $\text{THF-d}_8$ ).

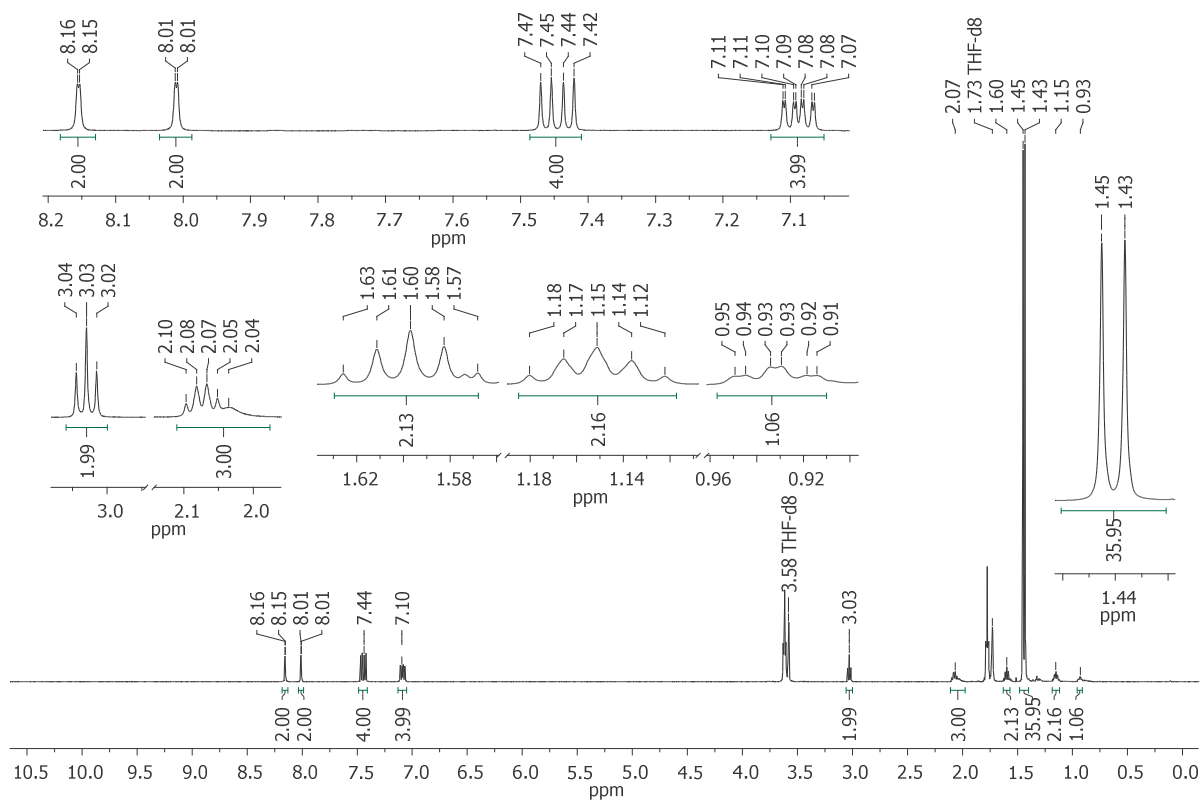

Figure S46:  $^1\text{H}$  NMR spectrum of  $\text{Li}[\text{15}^{\text{C5,Br}}]$  (500.2 MHz,  $\text{THF-d}_8$ ).

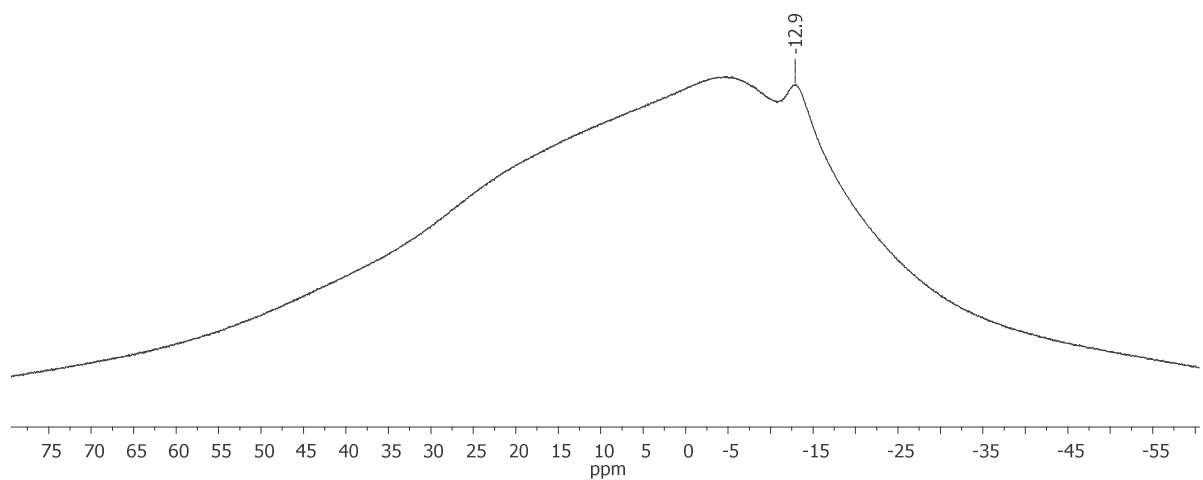

Figure S47:  $^{11}\text{B}$  NMR spectrum of  $\text{Li}[\text{15}^{\text{C5,Br}}]$  (160.5 MHz,  $\text{THF-d}_8$ ).

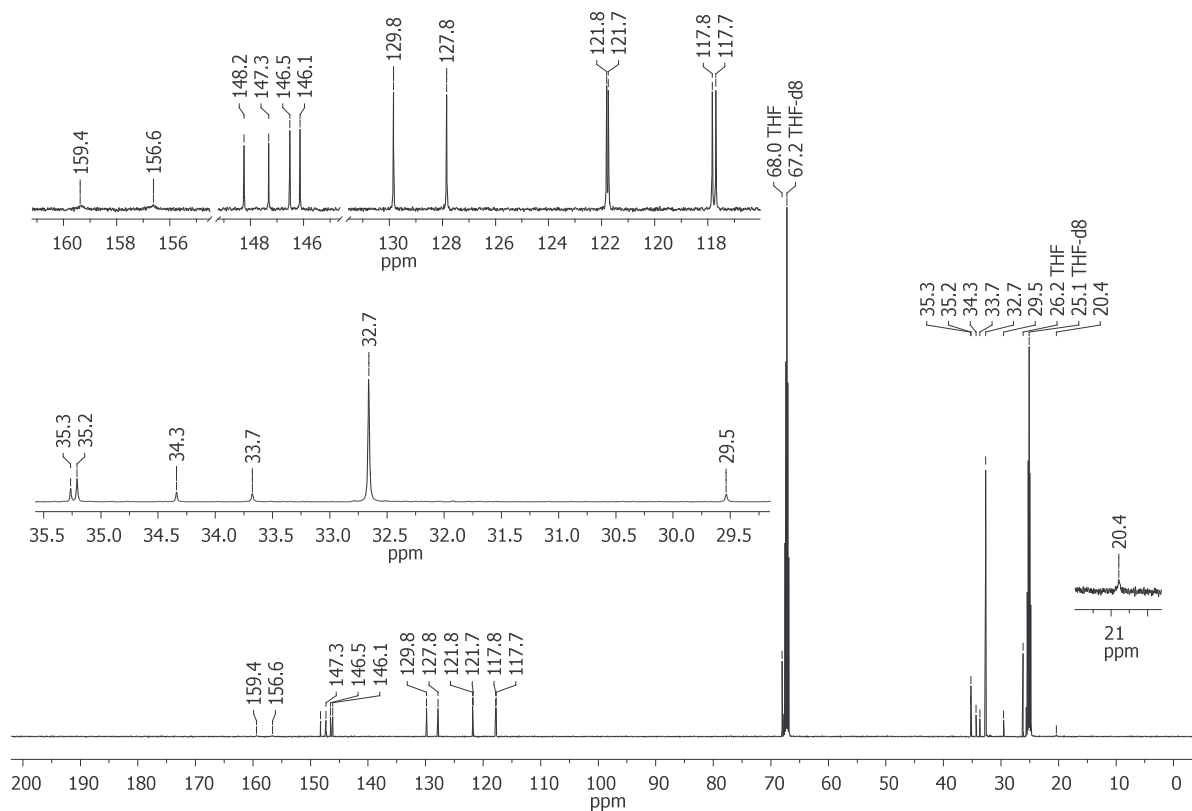

Figure S48:  $^{13}\text{C}\{^1\text{H}\}$  NMR spectrum of  $\text{Li}[\text{15}^{\text{C5,Br}}]$  (125.8 MHz,  $\text{THF-d}_8$ ).

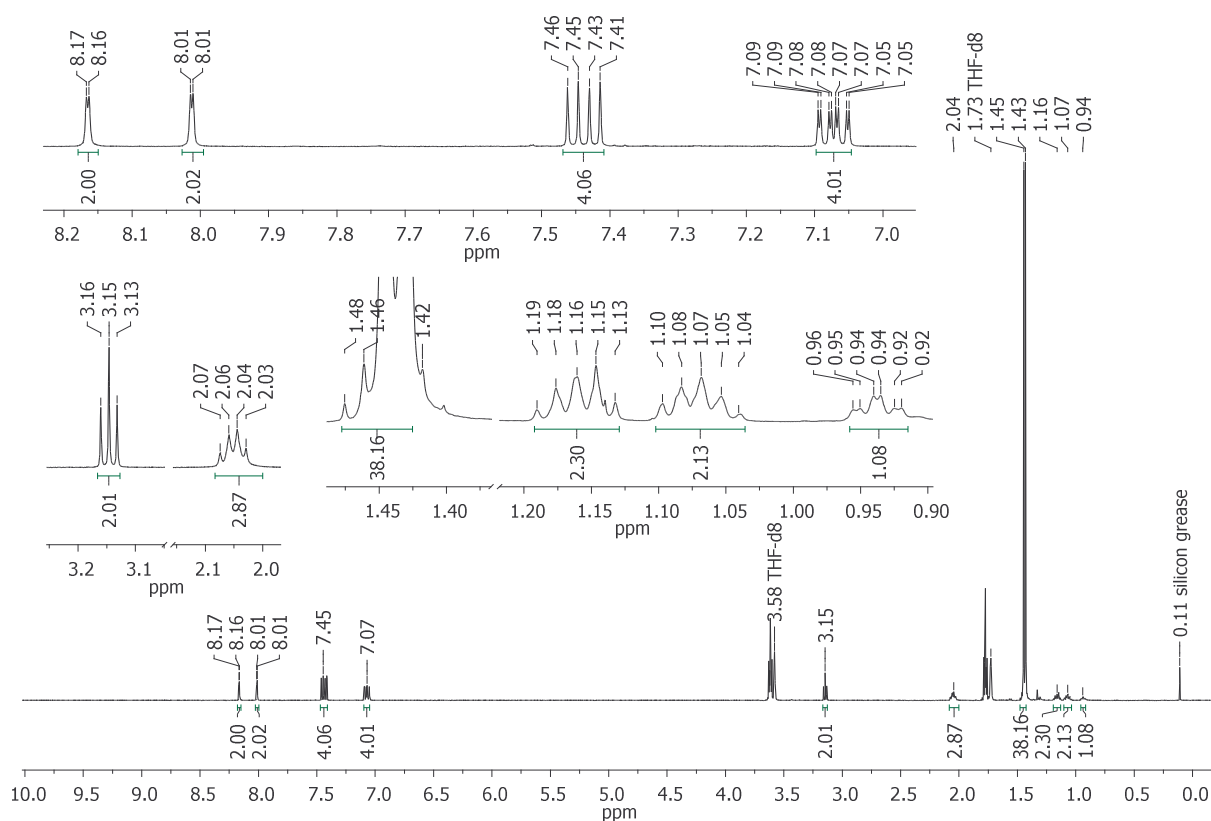

Figure S49:  $^1\text{H}$  NMR spectrum of  $\text{Li}[\text{15}^{\text{C6,Cl}}]$  (500.2 MHz,  $\text{THF-d}_8$ ).

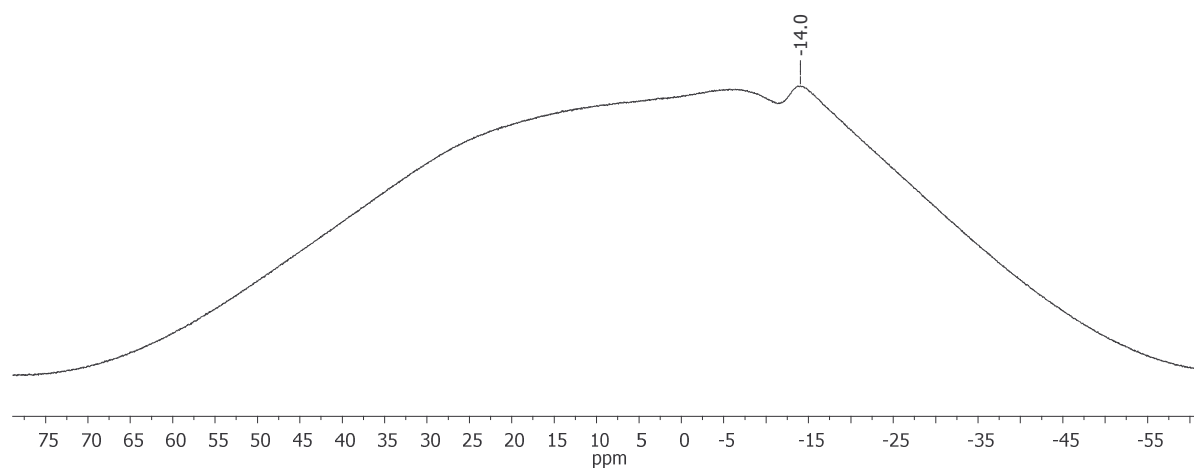

Figure S50:  $^{11}\text{B}$  NMR spectrum of  $\text{Li}[\text{15}^{\text{C6,Cl}}]$  (160.5 MHz,  $\text{THF-}d_8$ ).

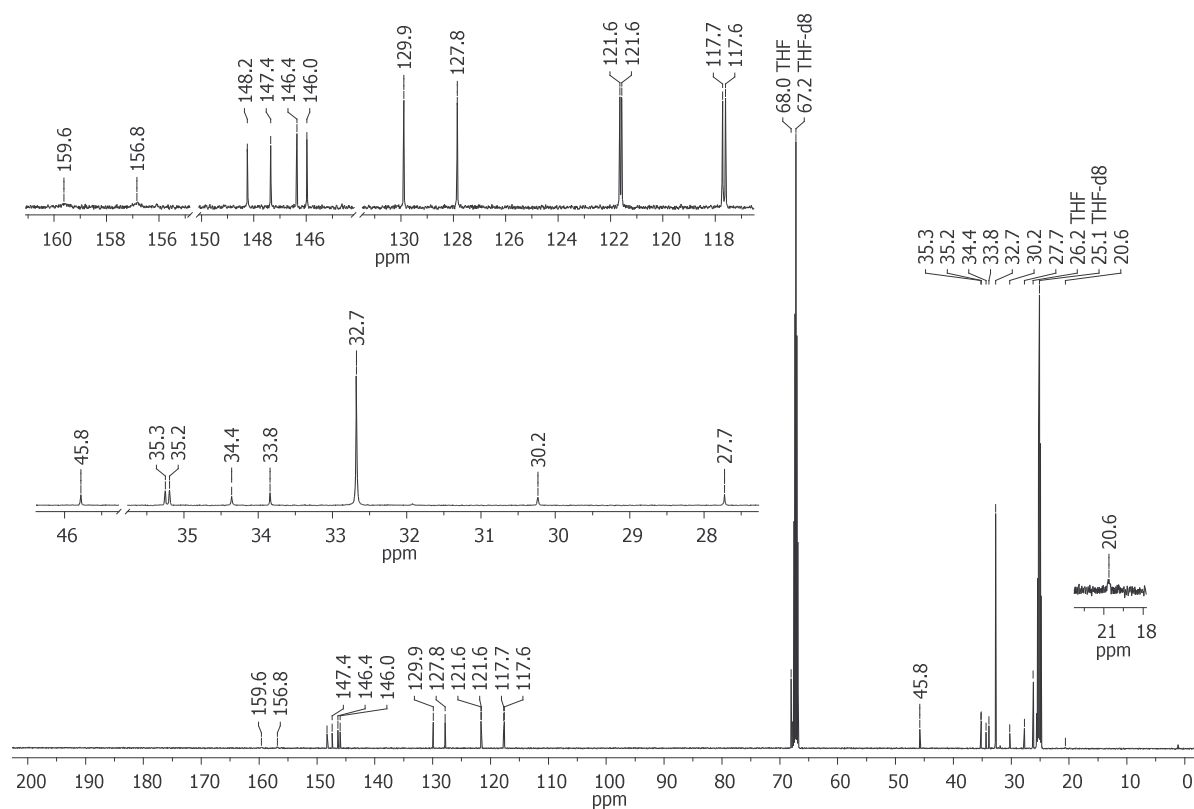

Figure S51:  $^{13}\text{C}\{^1\text{H}\}$  NMR spectrum of  $\text{Li}[\text{15}^{\text{C6,Cl}}]$  (125.8 MHz,  $\text{THF-}d_8$ ).



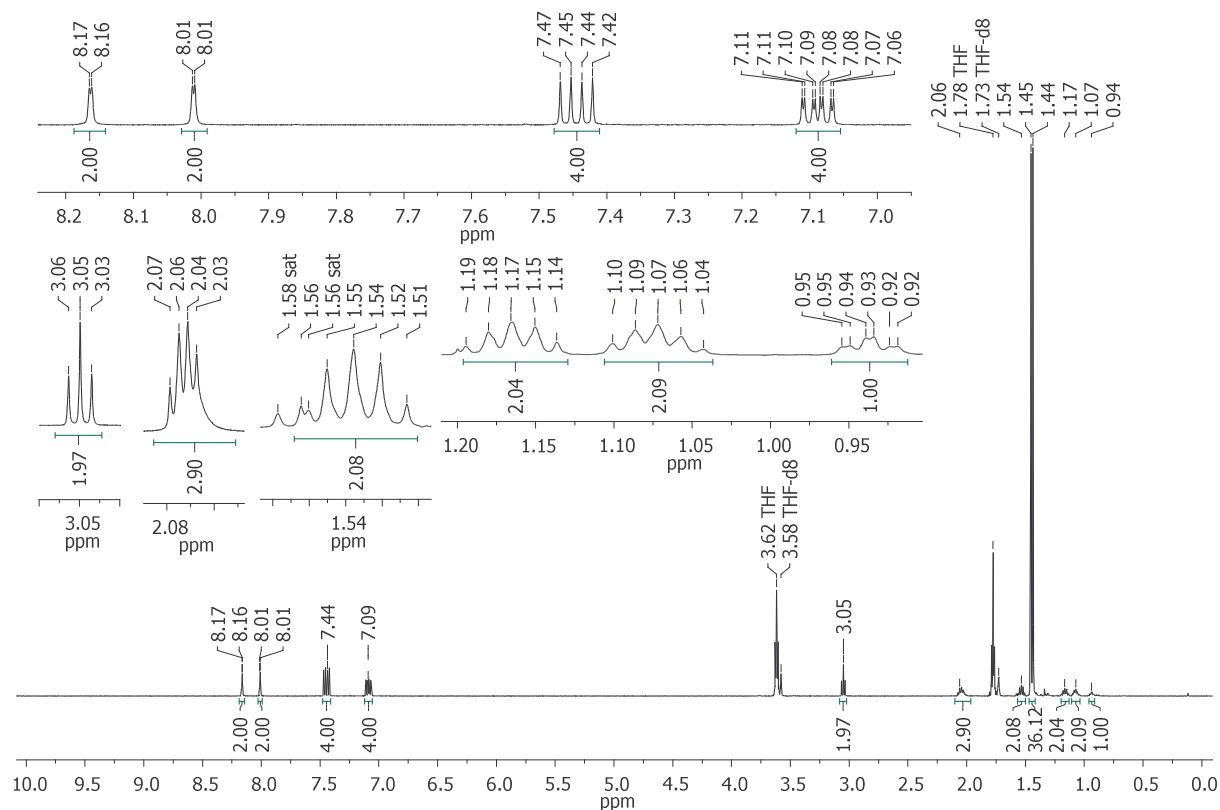

Figure S52:  $^1\text{H}$  NMR spectrum of  $\text{Li}[\text{15}^{\text{C6,Br}}]$  (500.2 MHz,  $\text{THF-d}_8$ ; sat =  $^{13}\text{C}$  satellite of a  $\text{CH}_3$  signal).

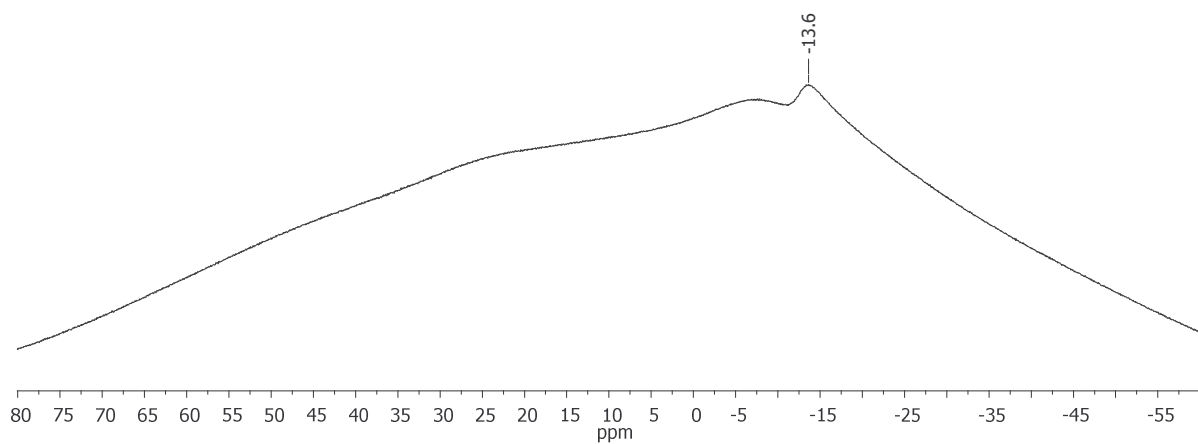

Figure S53:  $^{11}\text{B}$  NMR spectrum of  $\text{Li}[\text{15}^{\text{C6,Br}}]$  (160.5 MHz,  $\text{THF-d}_8$ ).

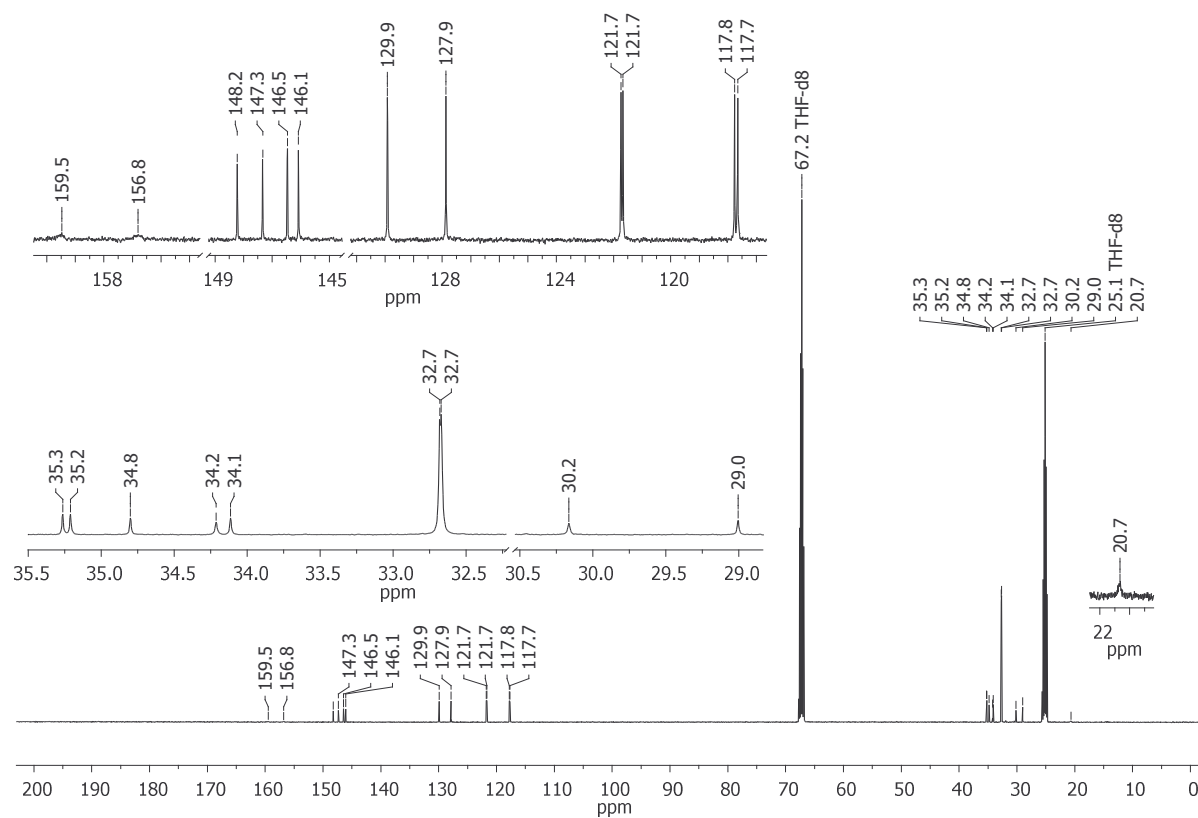

Figure S54:  $^{13}\text{C}\{^1\text{H}\}$  NMR spectrum of  $\text{Li}[\text{15}^{\text{C6,Br}}]$  (125.8 MHz,  $\text{THF-d}_8$ ).

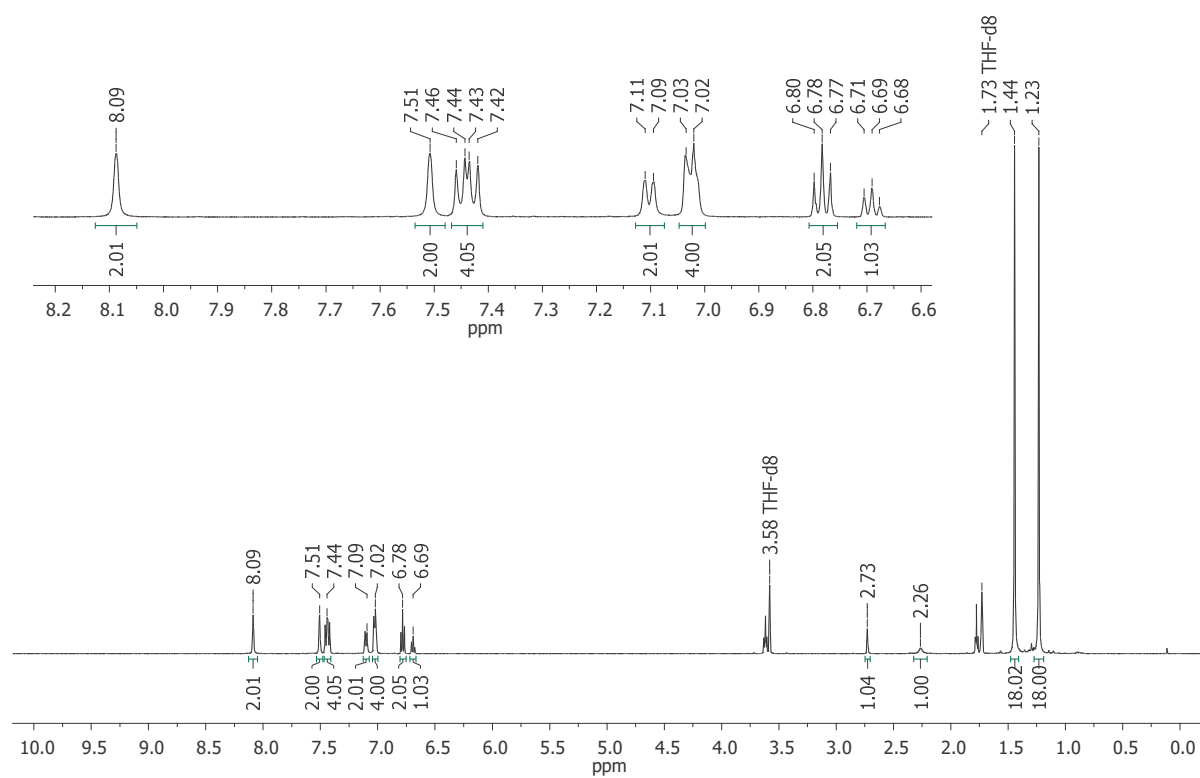

Figure S55:  $^1\text{H}$  NMR spectrum of  $\text{Li}[\text{16}]$  (500.2 MHz,  $\text{THF-d}_8$ ).

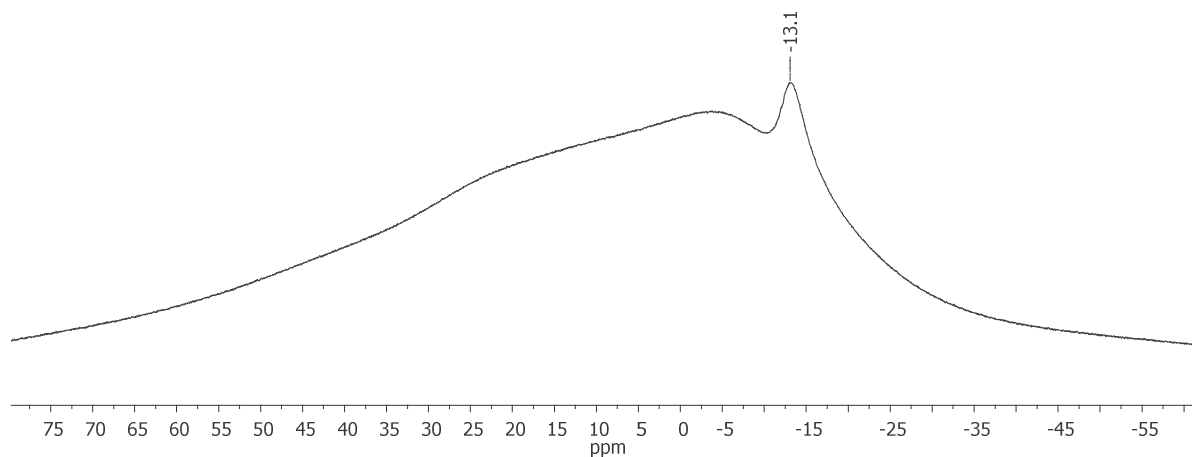

Figure S56:  $^{11}\text{B}$  NMR spectrum of Li[16] (160.5 MHz,  $\text{THF-}d_8$ ).

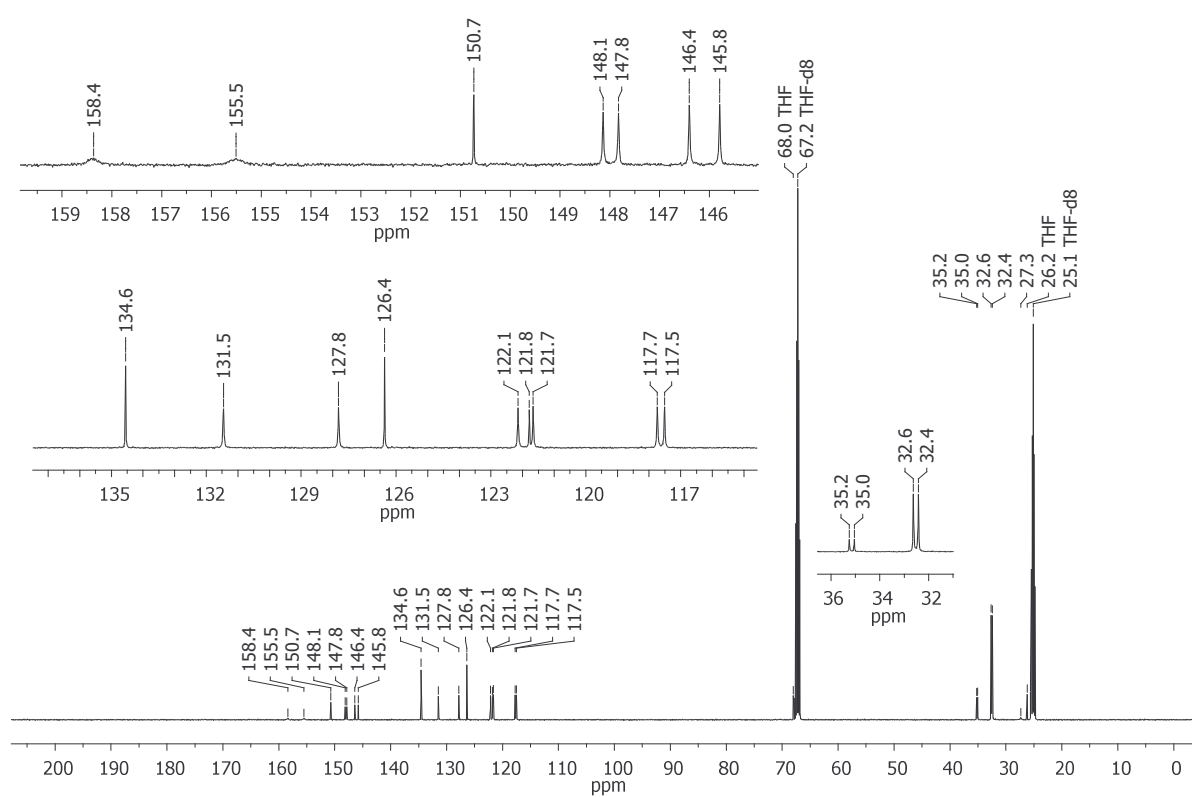

Figure S57:  $^{13}\text{C}\{^1\text{H}\}$  NMR spectrum of Li[16] (125.8 MHz,  $\text{THF-}d_8$ ).

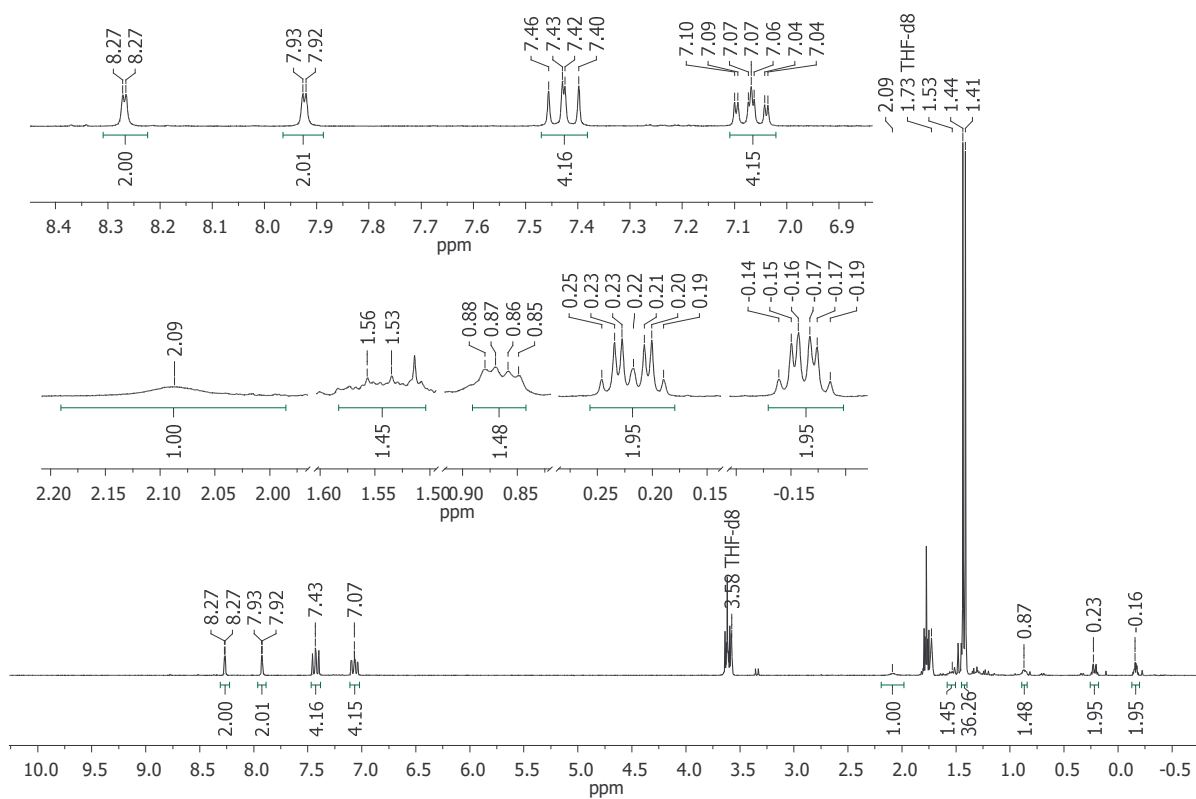

Figure S58:  $^1\text{H}$  NMR spectrum of Li[17] (300.0 MHz, THF- $d_8$ ).

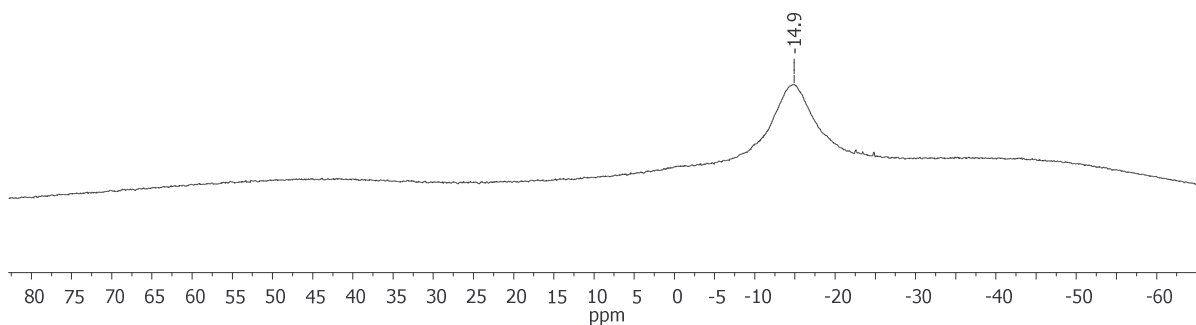

Figure S59:  $^{11}\text{B}$  NMR spectrum of Li[17] (96.3 MHz, THF- $d_8$ ).

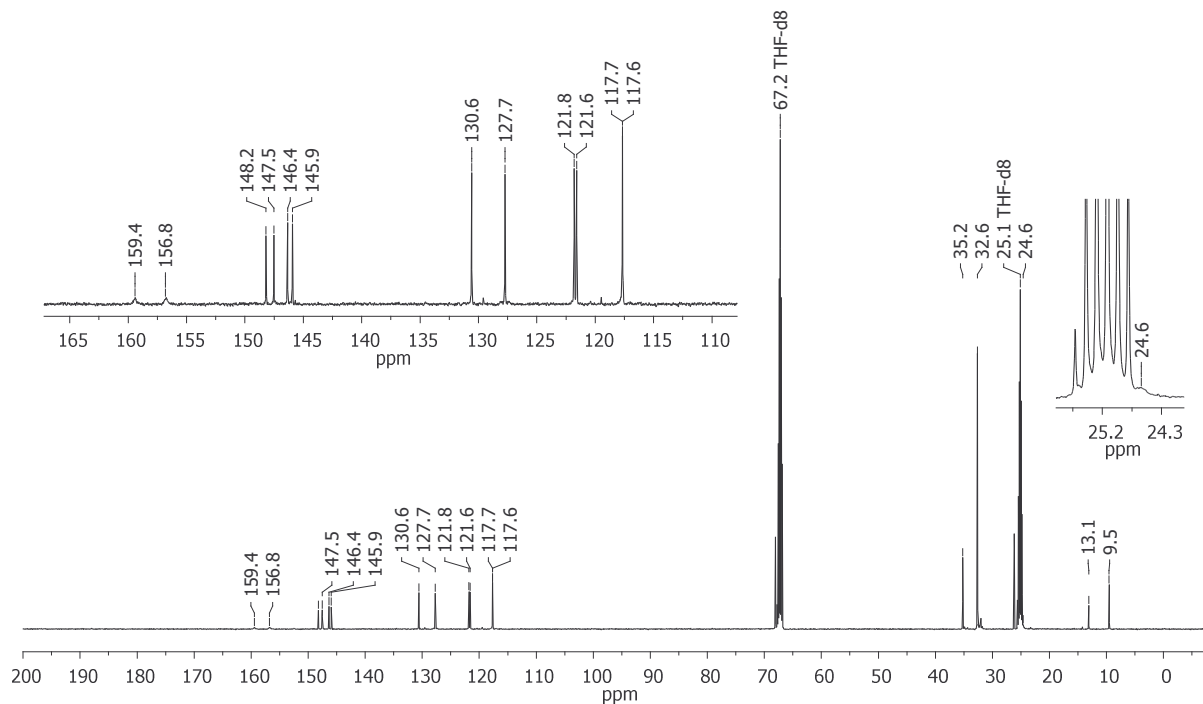

Figure S60:  $^{13}\text{C}\{^1\text{H}\}$  NMR spectrum of Li[17] (125.8 MHz, THF- $d_8$ ).

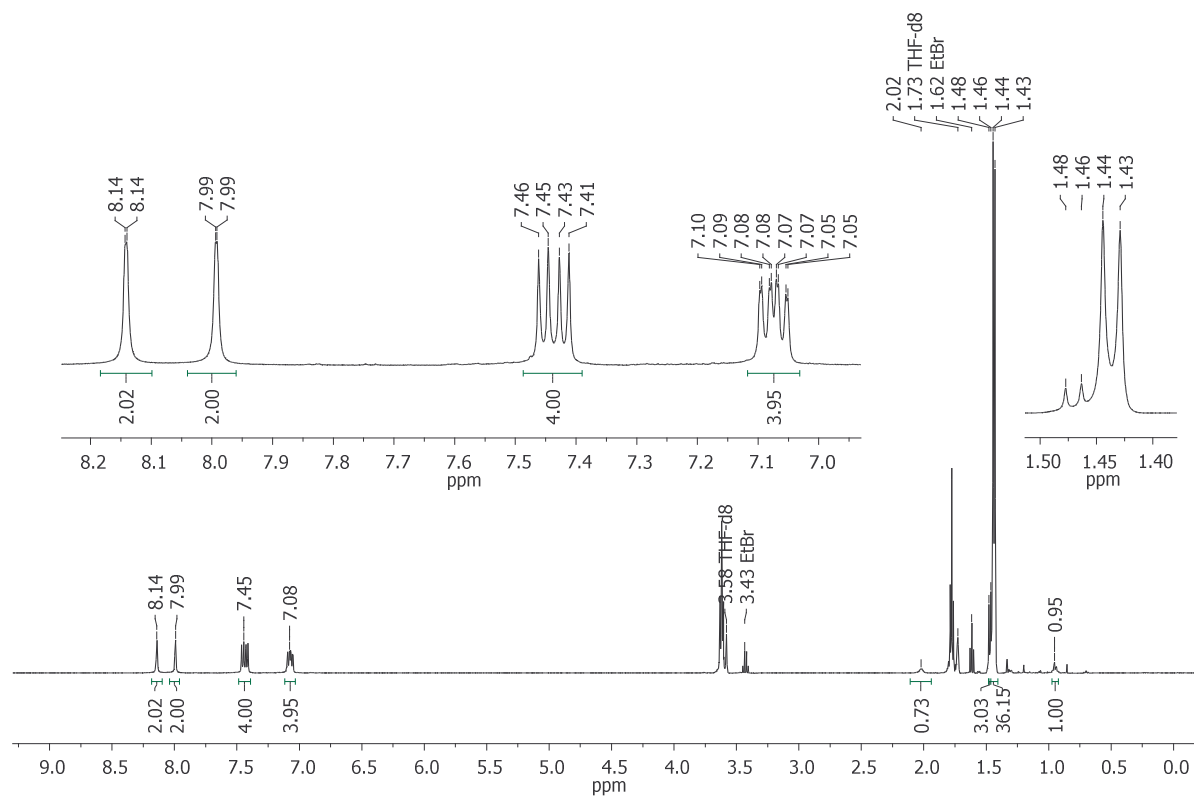

Figure S61:  $^1\text{H}$  NMR spectrum of Li[19] (500.2 MHz, THF- $d_8$ ).

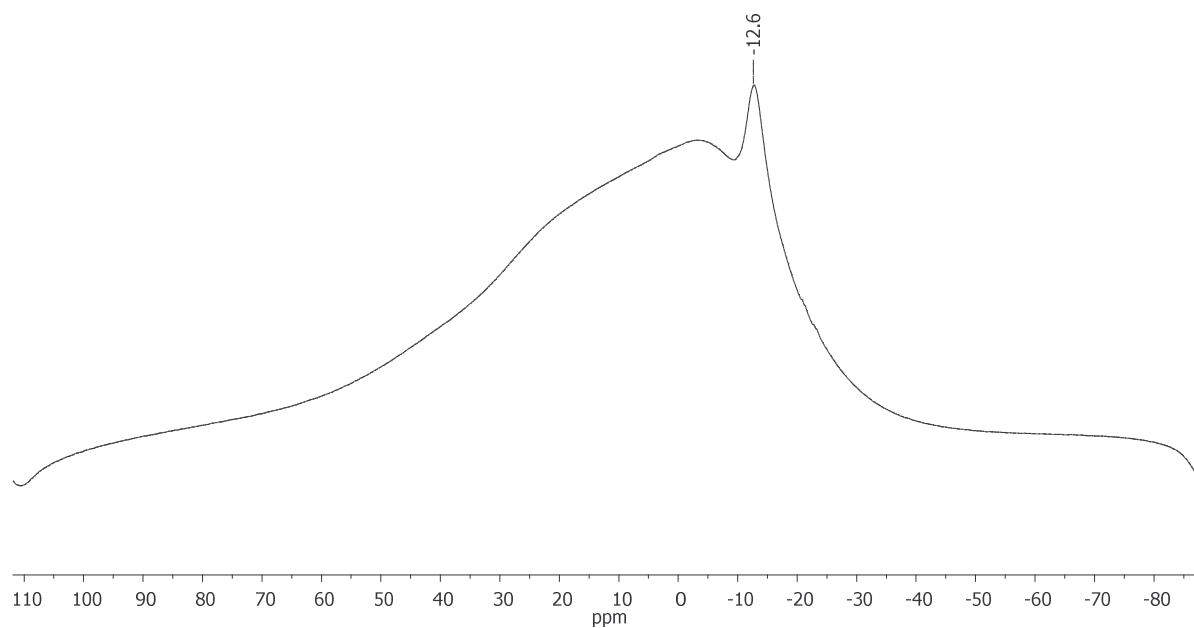

Figure S62:  $^{11}\text{B}$  NMR spectrum of Li[19] (160.5 MHz, THF- $d_8$ ).

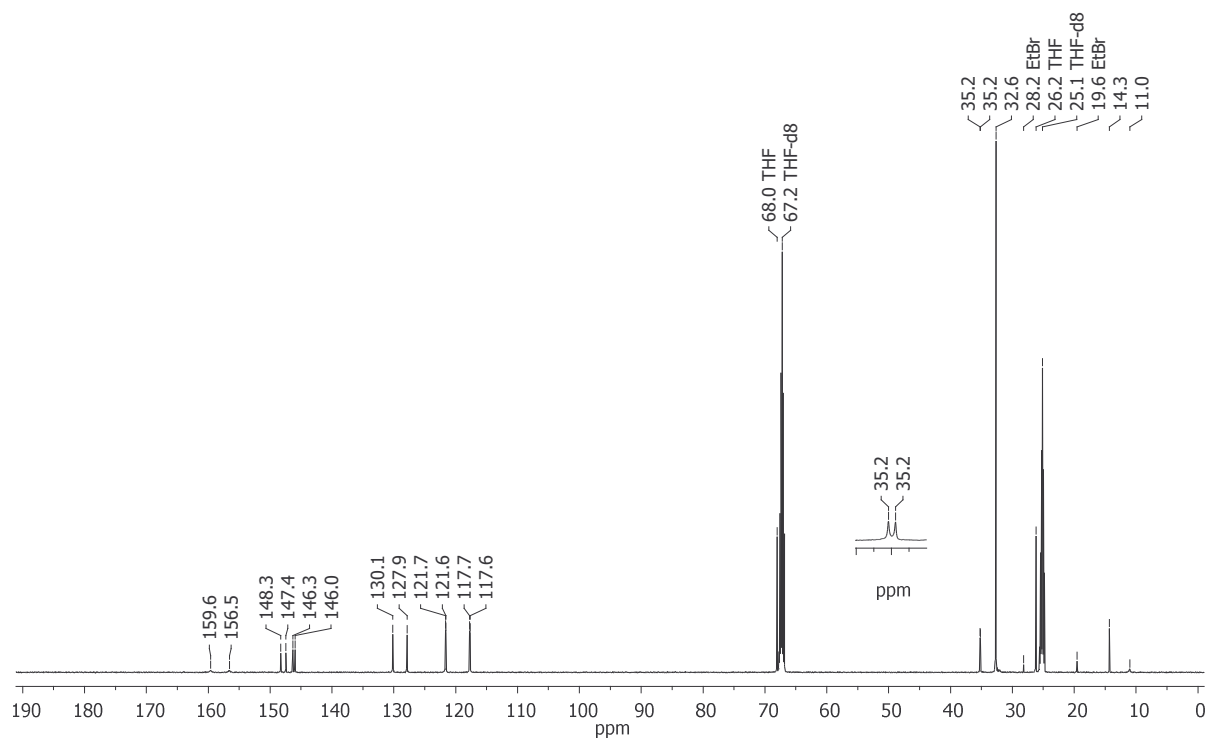

Figure S63:  $^{13}\text{C}\{^1\text{H}\}$  NMR spectrum of Li[19] (125.8 MHz, THF- $d_8$ ).

### 3. X-ray

Data for all structures were collected on a STOE IPDS II two-circle diffractometer with a Genix Microfocus tube with mirror optics using MoK $\alpha$  radiation ( $\lambda = 0.71073 \text{ \AA}$ ). The data were scaled using the frame-scaling procedure in the *X-AREA* program system.<sup>56</sup> The structures were solved by direct methods using the program *SHELXS*<sup>57</sup> and refined against  $F^2$  with full-matrix least-squares techniques using the program *SHELXL*.<sup>57</sup>

| Structure                                                      | Internal code | CCDC reference number |
|----------------------------------------------------------------|---------------|-----------------------|
| [Li(thf) <sub>4</sub> ][ <b>2</b> ]                            | wa2120        | 1819687               |
| [Li(thf) <sub>3</sub> ][ <b>2</b> ]                            | wa2506        | 1819688               |
| [Li(thf) <sub>3</sub> (Et <sub>2</sub> O)][ <b>7</b> ]         | wa2456        | 1819689               |
| [Li(12-crown-4)(thf)][Li(thf) <sub>2</sub> ][ <b>11</b> ]      | wa2374        | 1819690               |
| [Li(thf) <sub>4</sub> ][ <b>16</b> ]                           | wa2467        | 1819691               |
| ( <b>14</b> <sup>C2</sup> ·thf)·4C <sub>6</sub> H <sub>6</sub> | wa2473        | 1819692               |
| <b>14</b> <sup>C3</sup>                                        | wa2461        | 1819693               |
| <b>14</b> <sup>C4</sup>                                        | wa2477        | 1819694               |
| [Li(12-crown-4) <sub>2</sub> ][ <b>15</b> <sup>C5,Cl</sup> ]   | wa2518        | 1819695               |

## [Li(thf)<sub>4</sub>][2]

Yellow single crystals of [Li(thf)<sub>4</sub>][2] were grown by gas-phase diffusion of hexane into a THF solution of Li[2] (3 d, room temperature).

The H atom bridging B1 and B2 was isotropically refined; the coordinates of the two H atoms bonded to C1 were also refined. One *t*Bu group is disordered over two positions with a site occupation factor of 0.793(9) for the major occupied site. In two thf ligands, two methylene groups are disordered over two positions with site occupation factors of 0.66(2) and 0.51(2) for the major occupied sites. In one thf ligand, three methylene groups are disordered over two positions, each with a site occupation factor of 0.63(2) for the major occupied site. The lengths of the C–C bonds involving the disordered atoms in the thf ligands were restrained to 1.50(1) Å and the 1-3 distances involving disordered C atoms in the thf ligands were restrained to 2.3(1) Å or 2.3(3) Å. The displacement ellipsoids of all disordered atoms were restrained to an isotropic behavior.

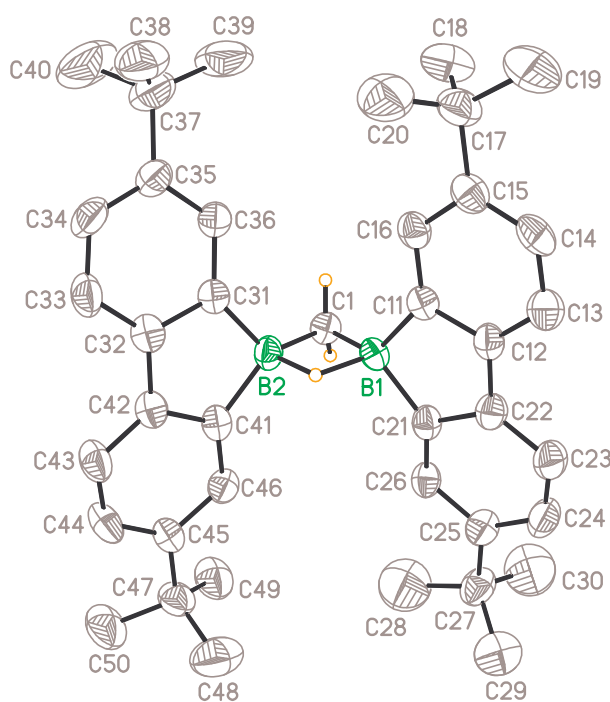

Figure S64: Molecular structure of [Li(thf)<sub>4</sub>][2] in the solid state. The solvent-separated [Li(thf)<sub>4</sub>]<sup>+</sup> cation and the CH atoms (except on C1) are omitted for clarity. Displacement ellipsoids are drawn at the 50% probability level. Selected atom...atom distance [Å], bond lengths [Å], and bond angles [°]: B(1)···B(2) = 1.974(6); B(1)–C(1) = 1.598(6), B(1)–C(11) = 1.624(5), B(1)–C(21) = 1.615(6), B(2)–C(1) = 1.581(6), B(2)–C(31) = 1.613(6), B(2)–C(41) = 1.629(6); B(1)–C(1)–B(2) = 76.8(3), C(11)–B(1)–C(21) = 100.7(3), C(31)–B(2)–C(41) = 100.2(3).



## [Li(thf)<sub>3</sub>][2]

Colorless single crystals of [Li(thf)<sub>3</sub>][2] precipitated from a C<sub>6</sub>H<sub>6</sub> solution of methyl triflate/[Li(thf)<sub>3</sub>]<sub>2</sub>[1] (1.1:1; 4 d, room temperature).

The asymmetric unit contains two crystallographically independent molecules of [Li(thf)<sub>3</sub>][2]. The H atom bridging the boron atoms and the H atoms located on the C atoms bonded to both boron atoms were isotropically refined for both independent molecules. In the asymmetric unit, two *t*Bu groups are disordered over two positions with site occupation factors of 0.78(2) and 0.53(4) for the major occupied sites. In two thf ligands, two methylene groups are disordered over two positions with site occupation factors of 0.63(2) and 0.53(1) for the major occupied sites. In one thf ligand, three methylene groups are disordered over two positions, each with a site occupation factor of 0.62(4) for the major occupied site. The displacement ellipsoids of all atoms in the coordinating [Li(thf)<sub>3</sub>]<sup>+</sup> ion were refined with a rigid bond restraint. The displacement ellipsoids of the disordered atoms were restrained to an isotropic behavior. Due to the absence of anomalous scatterers, the absolute structure could not be determined (Flack-*x*-parameter 1.5(10)).

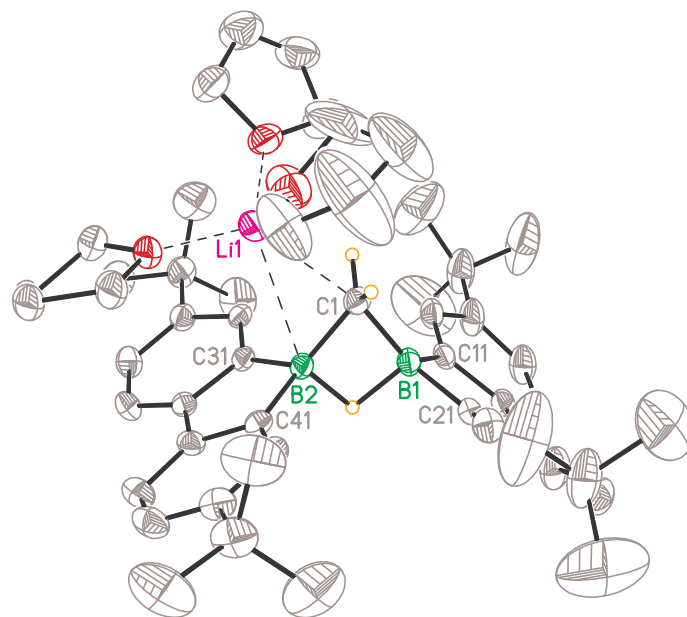

Figure S65: Molecular structure of one of the two crystallographically independent molecules of [Li(thf)<sub>3</sub>][2] in the solid state. The CH atoms (except on C1) are omitted for clarity. Displacement ellipsoids are drawn at the 30% probability level. Selected atom...atom distance [Å], bond lengths [Å], and bond angles [°] of the two crystallographically independent molecules: B(1)···B(2) = 1.967(9)/1.950(9); B(1)–C(1) = 1.608(8)/1.606(8), B(1)–C(11) = 1.592(9)/1.618(8), B(1)–C(21) = 1.602(9)/1.613(9), B(2)–C(1) = 1.600(9)/1.601(8), B(2)–C(31) = 1.611(9)/1.622(9), B(2)–C(41) = 1.613(9)/1.606(9); B(1)–C(1)–B(2) = 75.7(4)/74.9(4), C(11)–B(1)–C(21) = 101.3(5)/101.1(5), C(31)–B(2)–C(41) = 100.9(5)/100.6(5).

*[Li(thf)<sub>3</sub>(Et<sub>2</sub>O)][7]*

Colorless single crystals of *[Li(thf)<sub>3</sub>(Et<sub>2</sub>O)][7]* precipitated from the THF/Et<sub>2</sub>O filtrate of the reaction *Li[HBtEt<sub>3</sub>]/1H<sub>2</sub>* (1 d, room temperature).

All the H atoms bonded to B were isotropically refined. Three *t*Bu groups are disordered over two positions with site occupation factors of 0.62(1), 0.59(2), and 0.52(2) for the major occupied sites. In one thf ligand, three methylene groups are disordered over two positions, each with a site occupation factor of 0.62(2) for the major occupied site. The disordered atoms were isotropically refined. Bond lengths and bond angles of one disordered *t*Bu group were restrained to be equal to those of the non-disordered *t*Bu group. Bond lengths and bond angles of the disordered thf ligand were restrained to be equal to those of a non-disordered thf ligand.

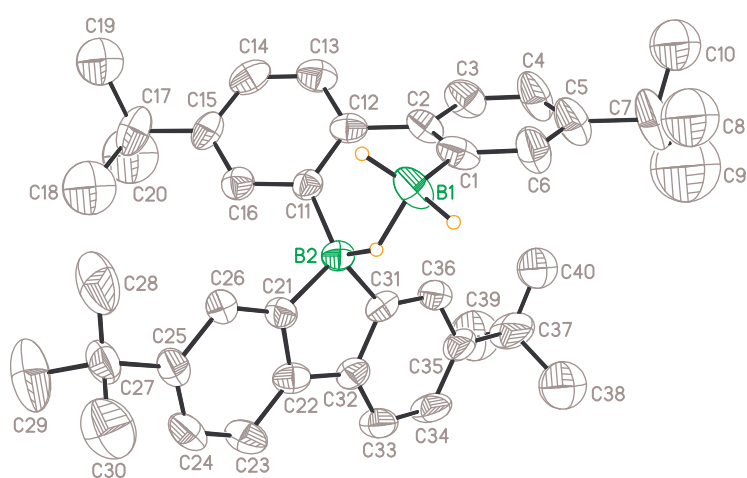

Figure S66: Molecular structure of *[Li(thf)<sub>3</sub>(Et<sub>2</sub>O)][7]* in the solid state. The solvent-separated *[Li(thf)<sub>3</sub>(Et<sub>2</sub>O)]<sup>+</sup>* cation and all CH atoms are omitted for clarity. Displacement ellipsoids are drawn at the 50% probability level. Selected atom...atom distance [Å], bond lengths [Å], bond angles [°], and torsion angle [°]: B(1)···B(2) = 2.382(8); B(1)–C(1) = 1.603(7), B(2)–C(11) = 1.623(7); B(1)–C(1)–C(2) = 122.5(5), B(2)–C(11)–C(12) = 124.6(4), C(21)–B(2)–C(31) = 100.3(3); C(1)–C(2)–C(12)–C(11) = –36.0(7).

*[Li(12-crown-4)(thf)][Li(thf)<sub>2</sub>][11]*

The reaction mixture *t*BuCCl/Li[1H] in THF was layered with hexane/12-crown-4 and stored at room temperature, whereupon orange single crystals of [Li(12-crown-4)(thf)][Li(thf)<sub>2</sub>][11] formed.

The H atom bonded to B1 was isotropically refined. Two *t*Bu groups are disordered over two positions with site occupation factors of 0.58(2) and 0.51(2) for the major occupied sites. In one thf ligand, one methylene group is disordered over two positions with a site occupation factor of 0.79(3) for the major occupied site. The displacement ellipsoids of the disordered atoms were restrained to an isotropic behavior.

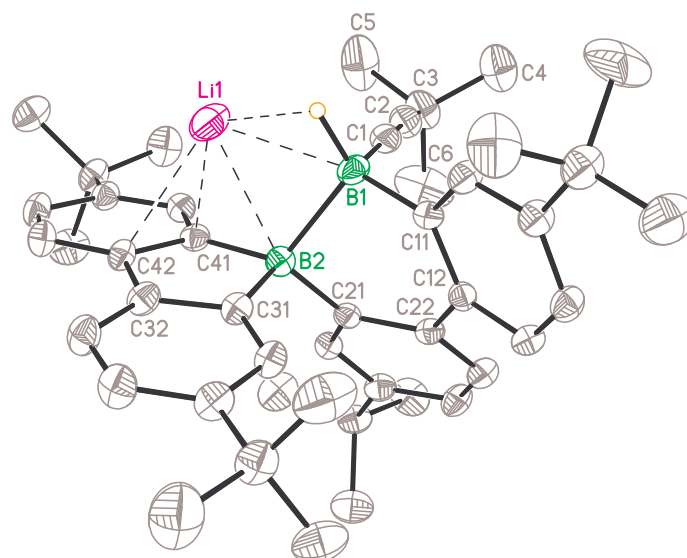

Figure S67: Molecular structure of [Li(12-crown-4)(thf)][Li(thf)<sub>2</sub>][11] in the solid state. The solvent-separated [Li(12-crown-4)(thf)]<sup>+</sup> cation, thf ligands, and all CH atoms are omitted for clarity. Displacement ellipsoids are drawn at the 30% probability level. Selected bond lengths [Å], bond angles [°], and torsion angle [°]: B(1)–B(2) = 1.879(5), B(1)–C(1) = 1.612(6), B(1)–C(11) = 1.617(5), B(2)–C(21) = 1.625(5), B(2)–C(31) = 1.631(5), B(2)–C(41) = 1.630(5), C(1)–C(2) = 1.221(5); B(1)–B(2)–C(21) = 97.5(2), B(1)–C(1)–C(2) = 175.1(3), B(1)–C(11)–C(12) = 120.3(3), B(2)–B(1)–C(1) = 105.9(2), B(2)–B(1)–C(11) = 102.2(2), B(2)–C(21)–C(22) = 121.3(2), C(1)–B(1)–C(11) = 114.4(3); C(11)–C(12)–C(22)–C(21) = –31.8(4).

### [Li(thf)<sub>4</sub>][16]

Colorless single crystals of [Li(thf)<sub>4</sub>][16] were grown by gas-phase diffusion of hexane into a THF solution of Li[16] (3 d, room temperature).

There are two crystallographically independent molecules of [Li(thf)<sub>4</sub>][16] in the asymmetric unit. Boron-bridging H atoms were isotropically refined. In one of the independent molecules three *t*Bu groups are disordered over two positions with site occupation factors of 0.54(1), 0.75(2), and 0.83(2). In the other independent molecule, three *t*Bu groups are disordered over two positions with site occupation factors of 0.52(3), 0.55(1), and 0.57(1). In one thf ligand, the O atom and two methylene groups are disordered over two positions, each with a site occupation factor of 0.69(1) for the major occupied site. In one thf ligand, two methylene groups are disordered over two positions, each with a site occupation factor of 0.51(1) for the major occupied site. The displacement ellipsoids of all disordered atoms and all atoms in the [Li(thf)<sub>4</sub>]<sup>+</sup> ions were restrained to an isotropic behavior. Bond lengths and angles in the disordered thf ligands were restrained to be equal to those in a non-disordered thf ligand.

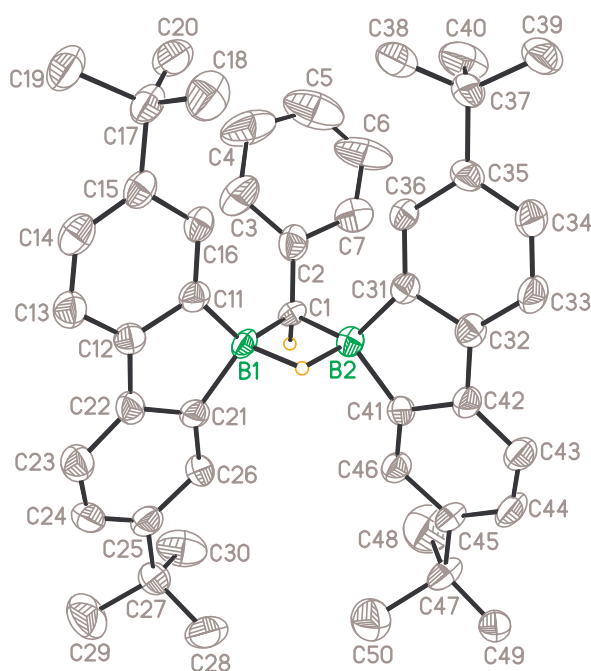

Figure S68: Molecular structure of one of the crystallographically independent molecules of [Li(thf)<sub>4</sub>][16] in the solid state. The solvent-separated [Li(thf)<sub>4</sub>]<sup>+</sup> cation and the CH atoms (except on C1) are omitted for clarity. Displacement ellipsoids are drawn at the 30% probability level. Selected atom...atom distance [Å], bond lengths [Å], and bond angles [°] of the two crystallographically independent molecules: B(1)···B(2) = 1.974(8)/1.990(8); B(1)–C(1) = 1.597(8)/1.625(7), B(1)–C(11) = 1.624(8)/1.615(8), B(1)–C(21) = 1.618(8)/1.601(8), B(2)–C(1) = 1.605(7)/1.613(9), B(2)–C(31) = 1.633(8)/1.609(8), B(2)–C(41) = 1.630(8)/1.602(9); B(1)–C(1)–B(2) = 76.1(4)/75.8(4), C(11)–B(1)–C(21) = 100.2(4)/102.3(4), C(31)–B(2)–C(41) = 101.0(4)/102.2(5).

$(\mathbf{14}^{\text{C}2}\cdot\text{thf})\cdot 4\text{C}_6\text{H}_6$

Yellow single crystals of  $(\mathbf{14}^{\text{C}2}\cdot\text{thf})\cdot 4\text{C}_6\text{H}_6$  were grown from the reaction mixture 1,2-dichloroethane/ $[\text{Li}(\text{thf})_3]_2[\mathbf{1}]$  in  $\text{C}_6\text{H}_6$  by slow evaporation of all volatiles at room temperature.

One of the two boron atoms is tetracoordinated by the thf ligand. Two tBu groups are disordered over two positions with site occupation factors of 0.818(6) and 0.61(2) for the major occupied sites. The displacement ellipsoids of the disordered atoms were restrained to an isotropic behavior.

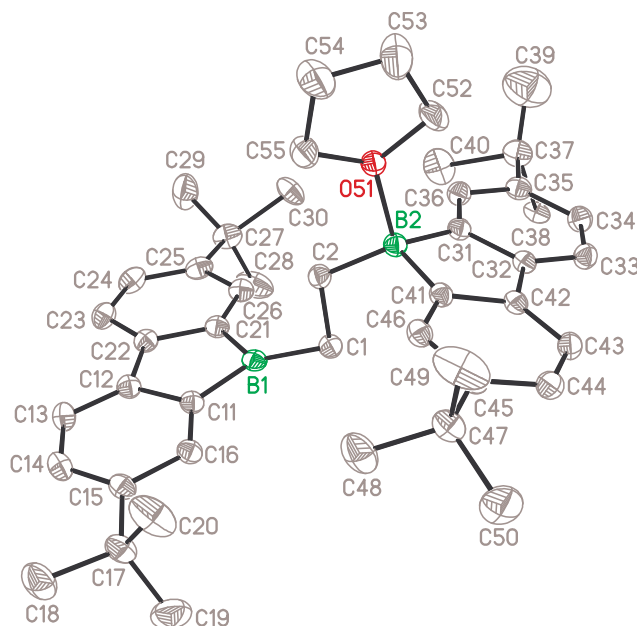

Figure S69: Molecular structure of  $(\mathbf{14}^{\text{C}2}\cdot\text{thf})\cdot 4\text{C}_6\text{H}_6$  in the solid state.  $\text{CH}$  atoms and  $\text{C}_6\text{H}_6$  molecules are omitted for clarity. Displacement ellipsoids are drawn at the 30% probability level. Selected bond lengths [Å], bond angles [°], and torsion angle [°]:  $\text{B}(1)\text{--C}(1) = 1.544(2)$ ,  $\text{B}(1)\text{--C}(11) = 1.577(2)$ ,  $\text{B}(1)\text{--C}(21) = 1.577(2)$ ,  $\text{B}(2)\text{--C}(2) = 1.609(2)$ ,  $\text{B}(2)\text{--C}(31) = 1.625(2)$ ,  $\text{B}(2)\text{--C}(41) = 1.620(2)$ ,  $\text{B}(2)\text{--O}(51) = 1.644(2)$ ,  $\text{C}(1)\text{--C}(2) = 1.566(2)$ ;  $\text{C}(1)\text{--B}(1)\text{--C}(11) = 128.0(1)$ ,  $\text{C}(1)\text{--B}(1)\text{--C}(21) = 128.3(1)$ ,  $\text{C}(11)\text{--B}(1)\text{--C}(21) = 102.8(1)$ ,  $\text{C}(2)\text{--B}(2)\text{--C}(31) = 118.0(1)$ ,  $\text{C}(2)\text{--B}(2)\text{--C}(41) = 118.1(1)$ ,  $\text{C}(31)\text{--B}(2)\text{--C}(41) = 100.0(1)$ ;  $\text{B}(1)\text{--C}(1)\text{--C}(2)\text{--B}(2) = -179.1(1)$ ;  $\sum(\text{C--B}(1)\text{--C}) = 359^\circ$ ;  $\sum(\text{C--B}(2)\text{--C}) = 336^\circ$ .

**14<sup>C3</sup>**

Yellow plates of **14<sup>C3</sup>** suitable for X-ray crystallography were grown from the reaction mixture 1,3-dibromopropane/Li<sub>2</sub>[**1**] in THF by slow evaporation of all volatiles at room temperature.

Due to the absence of anomalous scatterers, the absolute structure could not be determined (Flack-x-parameter 1.8(10)).

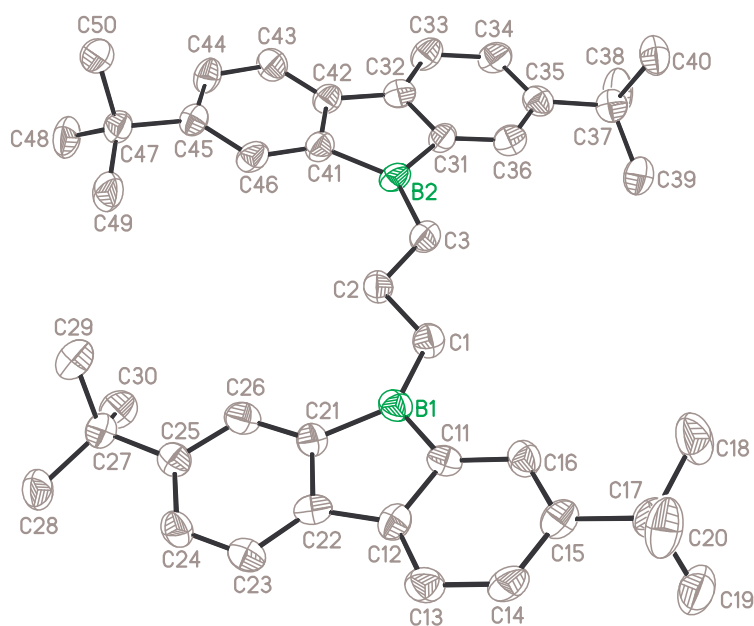

Figure S70: Molecular structure of **14<sup>C3</sup>** in the solid state. *CH* atoms are omitted for clarity. Displacement ellipsoids are drawn at the 50% probability level. Selected bond lengths [Å] and bond angles [°]: B(1)–C(1) = 1.563(9), B(1)–C(11) = 1.569(9), B(1)–C(21) = 1.571(9), B(2)–C(3) = 1.577(9), B(2)–C(31) = 1.560(9), B(2)–C(41) = 1.571(10); C(1)–B(1)–C(11) = 125.1(6), C(1)–B(1)–C(21) = 131.8(6), C(11)–B(1)–C(21) = 103.0(5), C(3)–B(2)–C(31) = 121.9(6), C(3)–B(2)–C(41) = 132.6(6), C(31)–B(2)–C(41) = 105.5(5). Angle between the planes of the borol rings [°]: 22.0.  $\sum(C-B(1)-C) = 359.9^\circ$ ;  $\sum(C-B(2)-C) = 360.0^\circ$ .

**14<sup>C4</sup>**

Yellow single crystals of **14<sup>C4</sup>** were grown from the reaction mixture 1,4-dibromobutane/Li<sub>2</sub>[**1**] in THF by slow evaporation of all volatiles at room temperature.

The asymmetric unit contains two half crystallographically independent molecules of **14<sup>C4</sup>** both located on a crystallographic center of inversion. The crystal was non-merohedrally twinned with a fractional contribution of 0.341(3) of the minor component.

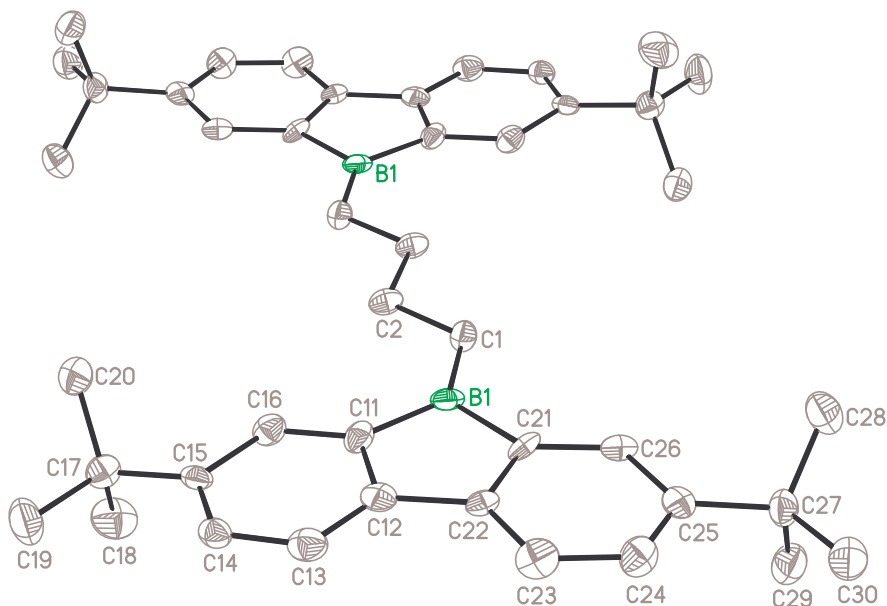

Figure S71: One of the two half crystallographically independent molecules of **14<sup>C4</sup>** in the solid state. *CH* atoms are omitted for clarity. Displacement ellipsoids are drawn at the 50% probability level. Selected bond lengths [Å] and bond angles [°] of the two half crystallographically independent molecules: B(1)–C(1) = 1.566(10)/1.577(9), B(1)–C(11) = 1.558(10)/1.595(9), B(1)–C(21) = 1.579(9)/1.558(10); C(1)–B(1)–C(11) = 131.7(6)/125.4(6), C(1)–B(1)–C(21) = 125.1(6)/131.4(5), C(11)–B(1)–C(21) = 103.2(6)/103.1(5). Angle between the planes of the borol rings [°]: 0.0.  $\Sigma$ (C–B(1)–C) = 360.0°/359.9°. Symmetry transformations used to generate equivalent atoms: 1)  $-x+1, -y+1, -z-1$ ; 2)  $-x, -y+1, -z-2$ .

*[Li(12-crown-4)<sub>2</sub>][15<sup>CS,Cl</sup>]*

The reaction mixture 1,5-dichloropentane/Li<sub>2</sub>[1] in THF was layered with hexane/12-crown-4 and stored at room temperature, whereupon colorless single crystals of [Li(12-crown-4)<sub>2</sub>][15<sup>CS,Cl</sup>] formed.

The asymmetric unit contains one-half of a molecule of [Li(12-crown-4)<sub>2</sub>][15<sup>CS,Cl</sup>] located on a crystallographic C<sub>2</sub> axis. Three methylene groups and the terminal Cl atom of the pentyl chain are disordered over the C<sub>2</sub> axis with two equally occupied positions. One *t*Bu group is disordered over two positions with a site occupation factor of 0.83(3) for the major occupied site. The C–C bond lengths in the pentyl chain were restrained to 1.50(1) Å and 1-3 C-C distances in this chain were restrained to 2.50(1) Å. The C–Cl bond length was restrained to 1.80(1) Å. The displacement ellipsoids of the disordered C atoms were restrained to an isotropic behavior. The Flack-x-parameter refined to –0.2(2). The boron-bridging H atom was isotropically refined.

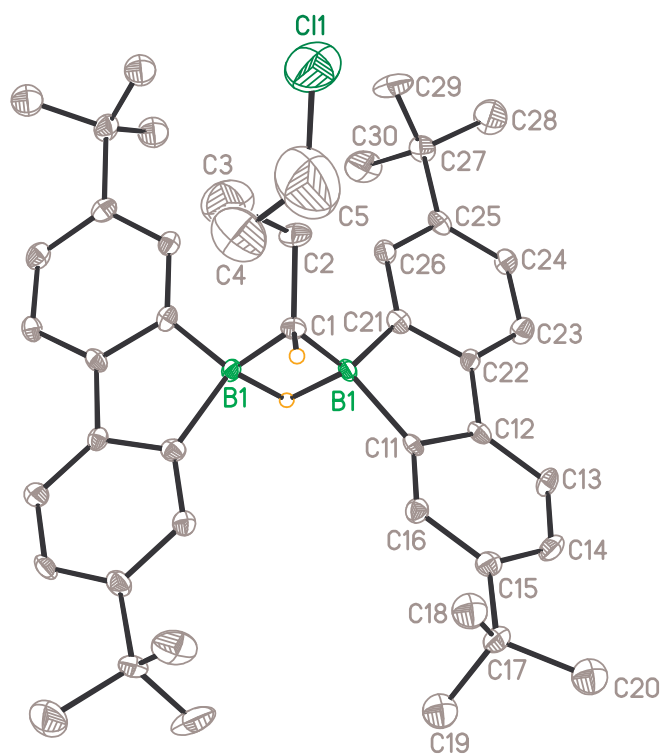

Figure S72: Molecular structure of [Li(12-crown-4)<sub>2</sub>][15<sup>CS,Cl</sup>] in the solid state. The solvent-separated [Li(12-crown-4)<sub>2</sub>]<sup>+</sup> cation and CH atoms (except on C1) are omitted for clarity. Displacement ellipsoids are drawn at the 30% probability level. Selected atom···atom distance [Å], bond lengths [Å], and bond angles [°]: B(1)···B(1) = 1.93(1); B(1)–C(1) = 1.60(1), B(1)–C(11) = 1.656(9), B(1)–C(21) = 1.643(9); C(1)–B(1)–C(11) = 122.8(5), C(1)–B(1)–C(21) = 124.6(5), C(11)–B(1)–C(21) = 98.6(5). Symmetry transformation used to generate equivalent atoms: –x+1, –y+1, z.



**Table S2.** Selected crystallographic data for [Li(thf)<sub>4</sub>][**2**], [Li(thf)<sub>3</sub>][**2**], and [Li(thf)<sub>3</sub>(Et<sub>2</sub>O)][**7**].

|                                                                             | [Li(thf) <sub>4</sub> ][ <b>2</b> ]                             | [Li(thf) <sub>3</sub> ][ <b>2</b> ]                             | [Li(thf) <sub>3</sub> (Et <sub>2</sub> O)][ <b>7</b> ]          |
|-----------------------------------------------------------------------------|-----------------------------------------------------------------|-----------------------------------------------------------------|-----------------------------------------------------------------|
| formula                                                                     | C <sub>57</sub> H <sub>83</sub> B <sub>2</sub> LiO <sub>4</sub> | C <sub>53</sub> H <sub>75</sub> B <sub>2</sub> LiO <sub>3</sub> | C <sub>56</sub> H <sub>85</sub> B <sub>2</sub> LiO <sub>4</sub> |
| <i>M<sub>r</sub></i>                                                        | 860.79                                                          | 788.69                                                          | 850.79                                                          |
| color, shape                                                                | colorless, needle                                               | colorless, block                                                | colorless, needle                                               |
| <i>T</i> [K]                                                                | 173(2)                                                          | 173(2)                                                          | 173(2)                                                          |
| radiation, λ [Å]                                                            | MoK <sub>α</sub> , 0.71073                                      | MoK <sub>α</sub> , 0.71073                                      | MoK <sub>α</sub> , 0.71073                                      |
| crystal system                                                              | orthorhombic                                                    | monoclinic                                                      | monoclinic                                                      |
| space group                                                                 | <i>Pccn</i>                                                     | <i>P2<sub>1</sub></i>                                           | <i>P2<sub>1</sub>/n</i>                                         |
| <i>a</i> [Å]                                                                | 21.5605(15)                                                     | 14.7750(10)                                                     | 10.7242(12)                                                     |
| <i>b</i> [Å]                                                                | 26.1802(19)                                                     | 19.9973(10)                                                     | 21.4641(16)                                                     |
| <i>c</i> [Å]                                                                | 19.2608(13)                                                     | 17.9098(12)                                                     | 24.027(3)                                                       |
| α [°]                                                                       | 90                                                              | 90                                                              | 90                                                              |
| β [°]                                                                       | 90                                                              | 109.105(5)                                                      | 97.208(9)                                                       |
| γ [°]                                                                       | 90                                                              | 90                                                              | 90                                                              |
| <i>V</i> [Å <sup>3</sup> ]                                                  | 10871.9(13)                                                     | 5000.2(6)                                                       | 5487.0(10)                                                      |
| <i>Z</i>                                                                    | 8                                                               | 4                                                               | 4                                                               |
| <i>D</i> <sub>calcd</sub> [g cm <sup>-3</sup> ]                             | 1.052                                                           | 1.048                                                           | 1.030                                                           |
| μ [mm <sup>-1</sup> ]                                                       | 0.063                                                           | 0.062                                                           | 0.061                                                           |
| <i>F</i> (000)                                                              | 3760                                                            | 1720                                                            | 1864                                                            |
| crystal size [mm]                                                           | 0.28 x 0.18 x 0.12                                              | 0.24 x 0.22 x 0.17                                              | 0.21 x 0.11 x 0.02                                              |
| rflns collected                                                             | 42030                                                           | 44665                                                           | 66414                                                           |
| independent rflns ( <i>R</i> <sub>int</sub> )                               | 9821 (0.1664)                                                   | 18711 (0.0674)                                                  | 10391 (0.1431)                                                  |
| data/restraints/parameters                                                  | 9821 / 190 / 681                                                | 18711 / 484 / 1209                                              | 10391 / 164 / 572                                               |
| GOF on <i>F</i> <sup>2</sup>                                                | 0.946                                                           | 0.910                                                           | 1.443                                                           |
| <i>R</i> <sub>1</sub> , <i>wR</i> <sub>2</sub> [ <i>I</i> > 2σ( <i>I</i> )] | 0.0860, 0.1598                                                  | 0.0712, 0.1404                                                  | 0.1344, 0.2573                                                  |
| <i>R</i> <sub>1</sub> , <i>wR</i> <sub>2</sub> (all data)                   | 0.2038, 0.2033                                                  | 0.1458, 0.1670                                                  | 0.2251, 0.2877                                                  |
| largest diff peak and hole [e Å <sup>-3</sup> ]                             | 0.418, -0.233                                                   | 0.421, -0.211                                                   | 0.933, -0.296                                                   |

**Table S3.** Selected crystallographic data for [Li(12-crown-4)(thf)][Li(thf)<sub>2</sub>][**11**], [Li(thf)<sub>4</sub>][**16**], and (**14**<sup>C2</sup>·thf)·4C<sub>6</sub>H<sub>6</sub>.

|                                                                             | [Li(12-crown-4)(thf)][Li(thf) <sub>2</sub> ][ <b>11</b> ]                     | [Li(thf) <sub>4</sub> ][ <b>16</b> ]                            | ( <b>14</b> <sup>C2</sup> ·thf)·4C <sub>6</sub> H <sub>6</sub> |
|-----------------------------------------------------------------------------|-------------------------------------------------------------------------------|-----------------------------------------------------------------|----------------------------------------------------------------|
| formula                                                                     | C <sub>66</sub> H <sub>98</sub> B <sub>2</sub> Li <sub>2</sub> O <sub>7</sub> | C <sub>63</sub> H <sub>87</sub> B <sub>2</sub> LiO <sub>4</sub> | C <sub>70</sub> H <sub>84</sub> B <sub>2</sub> O               |
| <i>M<sub>r</sub></i>                                                        | 1038.94                                                                       | 936.88                                                          | 962.99                                                         |
| color, shape                                                                | orange, plate                                                                 | colorless, plate                                                | yellow, block                                                  |
| <i>T</i> [K]                                                                | 173(2)                                                                        | 173(2)                                                          | 173(2)                                                         |
| radiation, λ [Å]                                                            | MoK <sub>α</sub> , 0.71073                                                    | MoK <sub>α</sub> , 0.71073                                      | MoK <sub>α</sub> , 0.71073                                     |
| crystal system                                                              | monoclinic                                                                    | monoclinic                                                      | triclinic                                                      |
| space group                                                                 | <i>P</i> 2 <sub>1</sub> / <i>c</i>                                            | <i>P</i> 2 <sub>1</sub> / <i>c</i>                              | <i>P</i> -1                                                    |
| <i>a</i> [Å]                                                                | 12.9451(8)                                                                    | 19.4970(15)                                                     | 10.4041(3)                                                     |
| <i>b</i> [Å]                                                                | 18.3459(7)                                                                    | 24.7864(18)                                                     | 11.5484(3)                                                     |
| <i>c</i> [Å]                                                                | 27.0962(17)                                                                   | 23.972(2)                                                       | 25.7360(7)                                                     |
| α [°]                                                                       | 90                                                                            | 90                                                              | 79.323(2)                                                      |
| β [°]                                                                       | 101.393(5)                                                                    | 92.463(7)                                                       | 85.313(2)                                                      |
| γ [°]                                                                       | 90                                                                            | 90                                                              | 81.220(2)                                                      |
| <i>V</i> [Å <sup>3</sup> ]                                                  | 6308.3(6)                                                                     | 11574.0(16)                                                     | 2998.51(14)                                                    |
| <i>Z</i>                                                                    | 4                                                                             | 8                                                               | 2                                                              |
| <i>D</i> <sub>calcd</sub> [g cm <sup>-3</sup> ]                             | 1.094                                                                         | 1.075                                                           | 1.067                                                          |
| μ [mm <sup>-1</sup> ]                                                       | 0.068                                                                         | 0.064                                                           | 0.060                                                          |
| <i>F</i> (000)                                                              | 2264                                                                          | 4080                                                            | 1044                                                           |
| crystal size [mm]                                                           | 0.24 x 0.19 x 0.04                                                            | 0.17 x 0.17 x 0.03                                              | 0.24 x 0.19 x 0.14                                             |
| rflns collected                                                             | 59630                                                                         | 87491                                                           | 69450                                                          |
| independent rflns ( <i>R</i> <sub>int</sub> )                               | 11144 (0.0915)                                                                | 21394 (0.1445)                                                  | 12158 (0.0402)                                                 |
| data/restraints/parameters                                                  | 11144 / 72 / 764                                                              | 21394 / 891 / 1484                                              | 12158 / 84 / 714                                               |
| GOF on <i>F</i> <sup>2</sup>                                                | 1.134                                                                         | 1.302                                                           | 1.037                                                          |
| <i>R</i> <sub>1</sub> , <i>wR</i> <sub>2</sub> [ <i>I</i> > 2σ( <i>I</i> )] | 0.0785, 0.1585                                                                | 0.1210, 0.2070                                                  | 0.0673, 0.1755                                                 |
| <i>R</i> <sub>1</sub> , <i>wR</i> <sub>2</sub> (all data)                   | 0.1447, 0.1797                                                                | 0.2818, 0.2432                                                  | 0.0782, 0.1838                                                 |
| largest diff peak and hole [e Å <sup>-3</sup> ]                             | 0.306, -0.212                                                                 | 0.704, -0.334                                                   | 0.539, -0.424                                                  |

**Table S4.** Selected crystallographic data for **14<sup>C3</sup>**, **14<sup>C4</sup>**, and [Li(12-crown-4)<sub>2</sub>][**15<sup>C5,Cl</sup>**].

|                                                                             | <b>14<sup>C3</sup></b>                         | <b>14<sup>C4</sup></b>                         | [Li(12-crown-4) <sub>2</sub> ][ <b>15<sup>C5,Cl</sup></b> ]       |
|-----------------------------------------------------------------------------|------------------------------------------------|------------------------------------------------|-------------------------------------------------------------------|
| formula                                                                     | C <sub>43</sub> H <sub>54</sub> B <sub>2</sub> | C <sub>44</sub> H <sub>56</sub> B <sub>2</sub> | C <sub>61</sub> H <sub>90</sub> B <sub>2</sub> ClLiO <sub>8</sub> |
| <i>M<sub>r</sub></i>                                                        | 592.48                                         | 606.50                                         | 1015.33                                                           |
| color, shape                                                                | yellow, plate                                  | yellow, block                                  | colorless, plate                                                  |
| <i>T</i> [K]                                                                | 173(2)                                         | 173(2)                                         | 173(2)                                                            |
| radiation, λ [Å]                                                            | MoK <sub>α</sub> , 0.71073                     | MoK <sub>α</sub> , 0.71073                     | MoK <sub>α</sub> , 0.71073                                        |
| crystal system                                                              | orthorhombic                                   | triclinic                                      | orthorhombic                                                      |
| space group                                                                 | <i>Pca2</i> <sub>1</sub>                       | <i>P</i> -1                                    | <i>Fdd2</i>                                                       |
| <i>a</i> [Å]                                                                | 41.344(3)                                      | 5.9740(9)                                      | 12.2698(10)                                                       |
| <i>b</i> [Å]                                                                | 14.2720(12)                                    | 14.639(2)                                      | 43.946(3)                                                         |
| <i>c</i> [Å]                                                                | 6.1349(5)                                      | 21.461(3)                                      | 21.961(2)                                                         |
| α [°]                                                                       | 90                                             | 82.273(12)                                     | 90                                                                |
| β [°]                                                                       | 90                                             | 89.910(12)                                     | 90                                                                |
| γ [°]                                                                       | 90                                             | 86.790(12)                                     | 90                                                                |
| <i>V</i> [Å <sup>3</sup> ]                                                  | 3620.0(5)                                      | 1856.9(5)                                      | 11841.6(17)                                                       |
| <i>Z</i>                                                                    | 4                                              | 2                                              | 8                                                                 |
| <i>D</i> <sub>calcd</sub> [g cm <sup>-3</sup> ]                             | 1.087                                          | 1.085                                          | 1.139                                                             |
| μ [mm <sup>-1</sup> ]                                                       | 0.060                                          | 0.060                                          | 0.116                                                             |
| <i>F</i> (000)                                                              | 1288                                           | 660                                            | 4400                                                              |
| crystal size [mm]                                                           | 0.17 x 0.13 x 0.08                             | 0.14 x 0.09 x 0.04                             | 0.26 x 0.24 x 0.11                                                |
| rfIns collected                                                             | 24978                                          | 16800                                          | 29925                                                             |
| independent rfIns ( <i>R</i> <sub>int</sub> )                               | 6651 (0.1309)                                  | 16800                                          | 5586 (0.1140)                                                     |
| data/restraints/parameters                                                  | 6651 / 1 / 406                                 | 16800 / 0 / 416                                | 5586 / 63 / 379                                                   |
| GOF on <i>F</i> <sup>2</sup>                                                | 0.840                                          | 1.207                                          | 1.121                                                             |
| <i>R</i> <sub>1</sub> , <i>wR</i> <sub>2</sub> [ <i>I</i> > 2σ( <i>I</i> )] | 0.0673, 0.1049                                 | 0.0880, 0.1686                                 | 0.0854, 0.1603                                                    |
| <i>R</i> <sub>1</sub> , <i>wR</i> <sub>2</sub> (all data)                   | 0.1448, 0.1282                                 | 0.1850, 0.1839                                 | 0.1296, 0.1780                                                    |
| largest diff peak and hole [e Å <sup>-3</sup> ]                             | 0.177, -0.162                                  | 0.359, -0.328                                  | 0.649, -0.220                                                     |

## 4. Computational details

DFT calculations were carried out with the Gaussian program package.<sup>58</sup> The PBE0<sup>59-12</sup> hybrid functional was used and combined with the D3BJ atom-pairwise dispersion correction with Becke-Johnson damping as devised by Grimme.<sup>513, 14</sup> Geometry optimizations and harmonic frequency calculations were computed under gas-phase conditions with the TZVP basis set.<sup>515</sup> All stationary points reported were characterized as minima or first order saddle points by eigenvalue analysis of the diagonalized Hessians. Gibbs energies reported correspond to the total energies of single point calculations with the SMD solvation model<sup>516</sup> (to account for effects of the THF solvent), corrected by thermal contributions from the gas-phase frequency analyses. Graphical representations of molecular geometries were produced with the *CYLview* software.<sup>517</sup>

## Minima

[5<sup>c</sup>]

Total energy = -1013.13778138 Hartree

Thermal correction to Gibbs free energy = 0.315916 Hartree

d(B...B) = 1.690623 Å

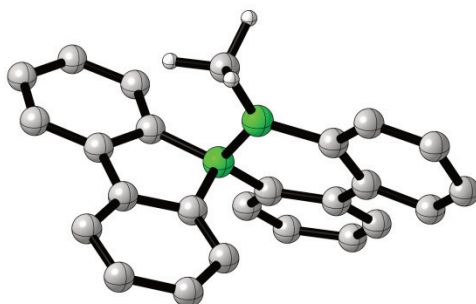

|   |              |              |              |   |              |              |              |
|---|--------------|--------------|--------------|---|--------------|--------------|--------------|
| B | -0.441967198 | 0.464857702  | 0.127632617  | C | 2.890633354  | 2.347533655  | -0.658552086 |
| B | 0.225700371  | -0.679245183 | 1.178087245  | C | 1.061197048  | 3.771214531  | -1.248071155 |
| C | -0.571464517 | -1.630514359 | 2.156272199  | H | -0.881937078 | 2.945367287  | -0.914556789 |
| C | -1.938766773 | 0.851279774  | 0.488876060  | C | 3.925080647  | -0.252221994 | 0.063459838  |
| C | -2.827741254 | -0.138378499 | 0.005023636  | C | 3.779272020  | -2.202133390 | 1.454558172  |
| C | -0.711703468 | -0.832404114 | -0.809277259 | H | 1.838040302  | -2.610152226 | 2.237639834  |
| C | 0.621563346  | 1.537209407  | -0.350327269 | H | -3.671719519 | -2.469913882 | -1.396959802 |
| C | 1.790603414  | -0.837354507 | 1.044791777  | C | -1.754129712 | -3.067852268 | -2.157963939 |
| C | -2.481883990 | 1.890935817  | 1.244952002  | H | -5.765328215 | 1.008762496  | 1.245390892  |
| C | -2.100180930 | -1.136160851 | -0.769401309 | H | 3.960676850  | 2.217991538  | -0.544309920 |
| C | -4.192188896 | -0.093660389 | 0.284151242  | C | 2.430670628  | 3.557561064  | -1.145398242 |
| C | 0.122999207  | -1.678474373 | -1.542352293 | H | 4.525956006  | 0.373420776  | -0.585496480 |
| C | 2.015866005  | 1.321973362  | -0.269736172 | C | 4.521762246  | -1.360580706 | 0.636620842  |
| C | 0.188216342  | 2.775086435  | -0.846665187 | H | -2.148048827 | -3.933502799 | -2.681881169 |
| C | 2.574236105  | 0.061804526  | 0.278656991  | H | 3.136513462  | 4.331636258  | -1.430343275 |
| C | 2.433904652  | -1.930841048 | 1.636349844  | H | 5.568849148  | -1.569562460 | 0.438157369  |
| C | -3.845293467 | 1.951460778  | 1.505035807  | H | -4.250553999 | 2.775549227  | 2.086047459  |
| H | -1.828623917 | 2.667125114  | 1.635910729  | H | 0.269230697  | -3.416972514 | -2.794549574 |
| C | -2.608635995 | -2.247157632 | -1.433386684 | H | 0.679336625  | 4.714925827  | -1.627555126 |
| H | -4.857533294 | -0.870726355 | -0.083265376 | H | 4.237309131  | -3.072275506 | 1.914749260  |
| C | -4.702154460 | 0.957599006  | 1.030913842  | H | -0.291522991 | -1.381184548 | 3.189353696  |
| C | -0.393309405 | -2.776983353 | -2.219119525 | H | -0.345561851 | -2.695052685 | 2.022475016  |
| H | 1.188190946  | -1.474342020 | -1.587150586 | H | -1.653252231 | -1.502801358 | 2.071277747  |

[6<sup>c</sup>-open]<sup>-</sup>

Total energy = -1013.12607437 Hartree

Thermal correction to Gibbs free energy = 0.313661 Hartree

d(B...B) = 1.689778 Å

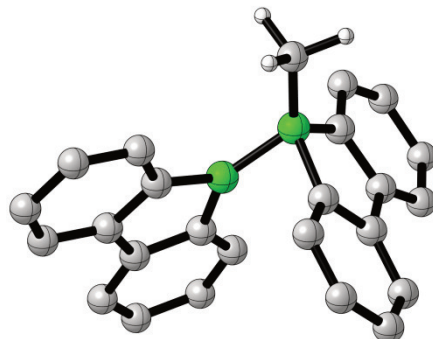

|   |              |              |              |   |              |              |              |
|---|--------------|--------------|--------------|---|--------------|--------------|--------------|
| B | 0.720147961  | -1.135240335 | 1.206158149  | C | -2.207807885 | 2.932925812  | -0.745189863 |
| B | -0.549192749 | -0.161076673 | 0.662901704  | H | -3.241465759 | 3.230229136  | -0.898166136 |
| C | 0.475381457  | -2.271006271 | 2.337009714  | C | -1.176257495 | 3.810335799  | -1.063658056 |
| C | 2.107279432  | -0.341259185 | 1.227308617  | H | -1.406260279 | 4.790900996  | -1.469774313 |
| C | 2.692089520  | -0.305127243 | -0.060500408 | C | 0.146015628  | 3.438696737  | -0.853273124 |
| C | 3.870833210  | 0.392946363  | -0.311718541 | C | 0.453118986  | 2.186457363  | -0.325406501 |
| H | 4.294454186  | 0.424204145  | -1.312194215 | H | 1.488416357  | 1.918887820  | -0.149663413 |
| C | 4.503498912  | 1.057829213  | 0.729161353  | C | -2.113139427 | -0.497714940 | 0.666975322  |
| H | 5.424616629  | 1.603347954  | 0.548017743  | C | -2.824831333 | 0.616940320  | 0.174036316  |
| C | 3.954268169  | 1.020657011  | 2.010469389  | C | -4.210642339 | 0.627837411  | 0.120454105  |
| C | 2.770238150  | 0.333077728  | 2.251637414  | H | -4.747139950 | 1.493495207  | -0.257575647 |
| H | 2.350404367  | 0.330345323  | 3.254561673  | C | -4.915040203 | -0.492077329 | 0.552979444  |
| C | 0.726379746  | -1.594191318 | -0.364092128 | H | -6.000082420 | -0.497656020 | 0.511022710  |
| C | 1.867049287  | -1.042353773 | -1.009848143 | C | -4.234519413 | -1.599715469 | 1.042115433  |
| C | 2.093775785  | -1.243672477 | -2.365712580 | C | -2.841835243 | -1.595786719 | 1.105114934  |
| H | 2.969671092  | -0.817575202 | -2.847409694 | H | -2.323323884 | -2.460950440 | 1.503699835  |
| C | 1.196648612  | -2.002007008 | -3.107556384 | H | 4.455712783  | 1.540230934  | 2.822632090  |
| H | 1.369674701  | -2.161960115 | -4.167558667 | H | -0.622334772 | -3.146285889 | -3.081063662 |
| C | 0.075619899  | -2.555134335 | -2.495549713 | H | -4.791349294 | -2.467709764 | 1.382026822  |
| C | -0.161591610 | -2.340677439 | -1.142639316 | H | 0.945655281  | 4.131920197  | -1.095852287 |
| H | -1.053375709 | -2.759990626 | -0.687620430 | H | 1.350242848  | -2.926411213 | 2.437180993  |
| C | -0.557471678 | 1.282145551  | -0.018741001 | H | -0.378713997 | -2.920819903 | 2.119088638  |
| C | -1.893869290 | 1.682435291  | -0.233629283 | H | 0.289276503  | -1.831984054 | 3.324866689  |

[6<sup>c</sup>]

Total energy = -1013.11924082 Hartree

Thermal correction to Gibbs free energy = 0.314099 Hartree

d(B...B) = 1.672597 Å

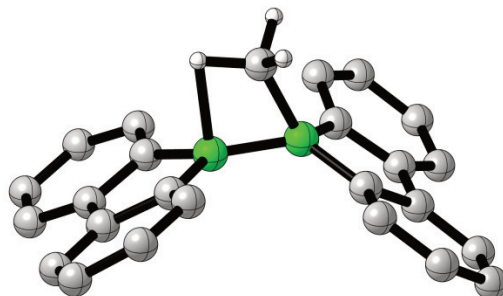

|   |              |              |              |   |              |              |              |
|---|--------------|--------------|--------------|---|--------------|--------------|--------------|
| B | 0.845333366  | -0.123641900 | 0.772344246  | C | -3.658202096 | 1.875976237  | -1.047446566 |
| B | -0.807549224 | 0.080432464  | 0.617700224  | H | -4.568694722 | 1.532485257  | -1.530240970 |
| C | 0.077242733  | -0.080809613 | 2.284120336  | C | -3.344734473 | 3.228556034  | -1.038508614 |
| C | 1.911146323  | 1.023933395  | 0.507228162  | H | -4.008159542 | 3.944255501  | -1.514285535 |
| C | 2.965688132  | 0.488105971  | -0.269678648 | C | -2.177337343 | 3.663263881  | -0.420131263 |
| C | 4.031699809  | 1.274072372  | -0.692740603 | C | -1.310724712 | 2.752423546  | 0.175642605  |
| H | 4.825647376  | 0.847374852  | -1.299841548 | H | -0.390213579 | 3.116332854  | 0.611855638  |
| C | 4.097155421  | 2.607159203  | -0.307457188 | C | -1.916075530 | -1.042969577 | 0.439254445  |
| H | 4.928294139  | 3.227503641  | -0.628810687 | C | -3.000807711 | -0.470859556 | -0.264487730 |
| C | 3.109211753  | 3.135863190  | 0.517809126  | C | -4.100799084 | -1.228516824 | -0.646247436 |
| C | 2.034892629  | 2.348293737  | 0.919957177  | H | -4.917981915 | -0.776780221 | -1.201440312 |
| H | 1.294911754  | 2.781270253  | 1.587981390  | C | -4.165863164 | -2.568023405 | -0.283349670 |
| C | 1.624675988  | -1.403483736 | 0.233431984  | H | -5.023602837 | -3.168223002 | -0.570794519 |
| C | 2.787725157  | -0.953549612 | -0.443888906 | C | -3.141700557 | -3.132204585 | 0.469551434  |
| C | 3.631371688  | -1.830950653 | -1.115796911 | C | -2.029527872 | -2.374671576 | 0.824178305  |
| H | 4.508748673  | -1.458613278 | -1.637883046 | H | -1.253878713 | -2.835856453 | 1.425006792  |
| C | 3.358714685  | -3.192032747 | -1.104338715 | H | 3.180271281  | 4.167277156  | 0.851503195  |
| H | 4.014996205  | -3.885726795 | -1.621060199 | H | 2.031964048  | -4.727109934 | -0.398058682 |
| C | 2.242467680  | -3.661485132 | -0.419435726 | H | -3.209127116 | -4.170871442 | 0.779001807  |
| C | 1.388844473  | -2.777275987 | 0.232280537  | H | -1.932252485 | 4.721175128  | -0.414856139 |
| H | 0.520321620  | -3.181839781 | 0.736922938  | H | 0.593359029  | 0.695994150  | 2.846381238  |
| C | -1.601038313 | 1.391052471  | 0.192733423  | H | 0.163282023  | -1.063683775 | 2.744886097  |
| C | -2.805037684 | 0.972661461  | -0.425635411 | H | -1.000733532 | 0.183912091  | 2.381245301  |

[2<sup>c</sup>-open]<sup>-</sup>

Total energy = -1013.14164203 Hartree

Thermal correction to Gibbs free energy = 0.314067 Hartree

d(B...B) = 2.343491 Å

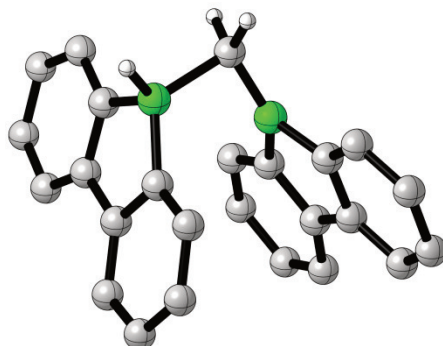

|   |              |              |              |   |              |              |              |
|---|--------------|--------------|--------------|---|--------------|--------------|--------------|
| B | -0.656663047 | 0.008448156  | -1.578232600 | H | -2.917086865 | -1.856388644 | -2.246277428 |
| B | 0.924016051  | -1.684198359 | -1.219971128 | C | 0.299339576  | -1.673813670 | 0.292200336  |
| H | 1.017934020  | -2.843701814 | -1.603452847 | C | 1.236892488  | -1.109852867 | 1.186128070  |
| C | 0.142922501  | -0.848116115 | -2.517753641 | C | 0.983672394  | -1.019746706 | 2.551161843  |
| H | 0.950937694  | -0.390977444 | -3.087574191 | H | 1.714156930  | -0.572967603 | 3.220138618  |
| H | -0.411756896 | -1.553356816 | -3.137115487 | C | -0.212434246 | -1.507909808 | 3.056828161  |
| C | -0.233492773 | 1.295074225  | -0.752204824 | H | -0.425250549 | -1.434156723 | 4.119193099  |
| C | -1.340887837 | 1.716773899  | 0.012962834  | C | -1.136934397 | -2.097707252 | 2.199545892  |
| C | -1.255233840 | 2.808323648  | 0.861954730  | C | -0.875954245 | -2.184478780 | 0.836902094  |
| H | -2.107465819 | 3.122025942  | 1.457702449  | H | -1.617641300 | -2.638772552 | 0.188007235  |
| C | -0.048127766 | 3.496015481  | 0.956074629  | C | 2.343752771  | -1.002175372 | -0.895709477 |
| H | 0.035877837  | 4.347177895  | 1.625189262  | C | 2.444713667  | -0.689086681 | 0.475305368  |
| C | 1.048614321  | 3.098790044  | 0.202820179  | C | 3.564631525  | -0.044741675 | 0.993175210  |
| C | 0.955165254  | 2.002415374  | -0.652640691 | H | 3.621250258  | 0.205151715  | 2.049055912  |
| H | 1.823755548  | 1.688049053  | -1.220978677 | C | 4.607714414  | 0.298701199  | 0.143753230  |
| C | -2.177616684 | -0.166891663 | -1.154964839 | H | 5.483187427  | 0.807557430  | 0.536282149  |
| C | -2.507870706 | 0.849718191  | -0.237806679 | C | 4.528537121  | -0.002973123 | -1.213724359 |
| C | -3.782458415 | 0.942094725  | 0.299247034  | C | 3.403305458  | -0.645157135 | -1.722914767 |
| H | -4.033330375 | 1.722011839  | 1.012091689  | H | 3.350158686  | -0.861471597 | -2.787930465 |
| C | -4.747091092 | 0.013802753  | -0.083757519 | H | 1.987562058  | 3.636064101  | 0.290855320  |
| H | -5.747503219 | 0.073508471  | 0.334205969  | H | -5.203239645 | -1.700729086 | -1.291509528 |
| C | -4.440339331 | -0.985733486 | -0.998858985 | H | 5.347471273  | 0.269255967  | -1.874009700 |
| C | -3.156485385 | -1.069446907 | -1.535964779 | H | -2.071790717 | -2.482798898 | 2.596590971  |



[2<sup>c</sup>]

Total energy = -1013.15160474 Hartree

Thermal correction to Gibbs free energy = 0.314029 Hartree

d(B...B) = 1.916075 Å

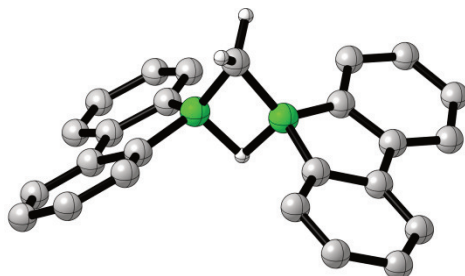

|   |              |              |              |   |              |              |              |
|---|--------------|--------------|--------------|---|--------------|--------------|--------------|
| B | -0.955185592 | 0.073866560  | 0.721830180  | H | -0.664912282 | 3.116995251  | 0.555495530  |
| B | 0.955186640  | -0.073860255 | 0.721835402  | C | 1.810984502  | -1.335790407 | 0.199526715  |
| H | 0.000005965  | 0.000004772  | -0.268992240 | C | 3.028757590  | -0.861326347 | -0.335320007 |
| C | -0.000002751 | 0.000006632  | 1.989491668  | C | 3.975623742  | -1.724762292 | -0.875046273 |
| H | -0.106671534 | -0.895803478 | 2.597947110  | H | 4.906657646  | -1.339141390 | -1.280893378 |
| H | 0.106663546  | 0.895820250  | 2.597942444  | C | 3.724136909  | -3.089970727 | -0.892694259 |
| C | -1.974809555 | -1.127350574 | 0.403057252  | H | 4.456065929  | -3.773359331 | -1.312370606 |
| C | -3.130852473 | -0.596042867 | -0.204010831 | C | 2.532335276  | -3.578367488 | -0.370407143 |
| C | -4.208915011 | -1.404252671 | -0.548948199 | C | 1.588411209  | -2.707139139 | 0.166932989  |
| H | -5.092030973 | -0.978812030 | -1.017207477 | H | 0.664915124  | -3.116987462 | 0.555537018  |
| C | -4.158561339 | -2.763941782 | -0.271886902 | C | 1.974815798  | 1.127353700  | 0.403062041  |
| H | -4.993781339 | -3.404623202 | -0.537894536 | C | 3.130849380  | 0.596043324  | -0.204021906 |
| C | -3.046019733 | -3.299191883 | 0.367804175  | C | 4.208911939  | 1.404249455  | -0.548967829 |
| C | -1.971703394 | -2.482050495 | 0.708189535  | H | 5.092019595  | 0.978807176  | -1.017241312 |
| H | -1.132767190 | -2.915041641 | 1.242199339  | C | 4.158570454  | 2.763936496  | -0.271894307 |
| C | -1.810986117 | 1.335794505  | 0.199518562  | H | 4.993791129  | 3.404614873  | -0.537907127 |
| C | -3.028765814 | 0.861326733  | -0.335310789 | C | 3.046042646  | 3.299187182  | 0.367820076  |
| C | -3.975639755 | 1.724758354  | -0.875030380 | C | 1.971725416  | 2.482049634  | 0.708211997  |
| H | -4.906678364 | 1.339133907  | -1.280863305 | H | 1.132802738  | 2.915039466  | 1.242243826  |
| C | -3.724153982 | 3.089966662  | -0.892691613 | H | -3.019897471 | -4.357638630 | 0.609566433  |
| H | -4.456088851 | 3.773351994  | -1.312363091 | H | -2.335130439 | 4.646270355  | -0.383184734 |
| C | -2.532344995 | 3.578367056  | -0.370425063 | H | 3.019932866  | 4.357630902  | 0.609596906  |
| C | -1.588413742 | 2.707143231  | 0.166909763  | H | 2.335121465  | -4.646271065 | -0.383154341 |

## Transition states

### *TS1*

Total energy = -1013.12056760 Hartree

Thermal correction to Gibbs free energy = 0.314542 Hartree

Imaginary frequency: -241.0656

d(B...B) = 1.634340 Å

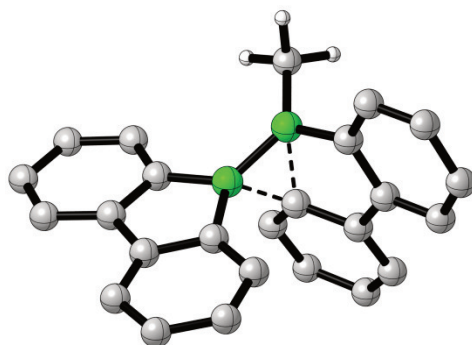

|   |              |              |              |   |              |              |              |
|---|--------------|--------------|--------------|---|--------------|--------------|--------------|
| B | 0.532998293  | -0.156226601 | 0.510418886  | C | -2.332863407 | -1.646867975 | -2.024923581 |
| B | -0.667226025 | -0.804368792 | 1.410663562  | C | -0.283071371 | -2.874281753 | -2.259244957 |
| C | -0.553161829 | -2.016399372 | 2.447619510  | H | 1.195730954  | -2.534373237 | -0.754485773 |
| C | 2.075325768  | -0.549017900 | 0.589012778  | C | -3.855763309 | 0.422129148  | -0.291187441 |
| C | 2.839761795  | 0.557332944  | 0.147866108  | C | -3.923133719 | 1.346497746  | 1.926568231  |
| C | 0.606033215  | 1.257543425  | -0.225146057 | H | -2.283496348 | 0.857529103  | 3.218509008  |
| C | -0.555087955 | -1.352153855 | -0.386554408 | H | 3.397298331  | 3.126564701  | -0.939987344 |
| C | -2.060188990 | -0.065650481 | 1.290546212  | C | 1.371994037  | 3.741356758  | -1.309974935 |
| C | 2.770341313  | -1.664867887 | 1.050788260  | H | 5.977400884  | -0.600765990 | 0.690035613  |
| C | 1.966145635  | 1.627744077  | -0.341314402 | H | -3.339735824 | -1.426654581 | -2.366297403 |
| C | 4.228942299  | 0.547493095  | 0.192802324  | C | -1.545744857 | -2.543821112 | -2.731270235 |
| C | -0.349488972 | 2.166857431  | -0.674472294 | H | -4.291254811 | 0.317120145  | -1.280895848 |
| C | -1.853824746 | -1.056819031 | -0.859252152 | C | -4.492950802 | 1.202551230  | 0.665359924  |
| C | 0.198044614  | -2.284510732 | -1.096112911 | H | 1.657054071  | 4.702382717  | -1.727767491 |
| C | -2.654246998 | -0.202386610 | 0.023150554  | H | -1.926245047 | -3.000348311 | -3.639972971 |
| C | -2.719186780 | 0.721078624  | 2.232430163  | H | -5.429262162 | 1.697915253  | 0.429073487  |
| C | 4.162055769  | -1.687808262 | 1.079834916  | H | 4.681681833  | -2.571176325 | 1.440108927  |
| H | 2.225893913  | -2.537211076 | 1.399095596  | H | -0.734154006 | 4.084823005  | -1.559802771 |
| C | 2.346801163  | 2.857790069  | -0.866882290 | H | 0.332935918  | -3.586499585 | -2.799567244 |
| H | 4.798523461  | 1.410671502  | -0.141085003 | H | -4.420515301 | 1.958256784  | 2.673827754  |
| C | 4.892159109  | -0.581740612 | 0.657393965  | H | -1.356304931 | -2.755008876 | 2.332318289  |
| C | 0.027769940  | 3.392078610  | -1.213751807 | H | -0.652129201 | -1.606437972 | 3.461760607  |
| H | -1.403822179 | 1.927068479  | -0.596142088 | H | 0.401573558  | -2.545644205 | 2.416149554  |

**TS2**

Total energy = -1013.11549001 Hartree

Thermal correction to Gibbs free energy = 0.314249 Hartree

Imaginary frequency: -116.0814

d(B...B) = 1.674970 Å

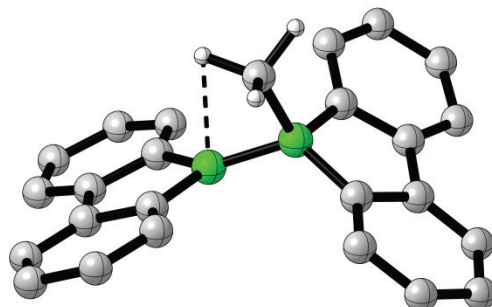

|   |              |              |              |   |              |              |              |
|---|--------------|--------------|--------------|---|--------------|--------------|--------------|
| B | 0.823342668  | -0.244773625 | 0.748845532  | C | -3.779222362 | 1.949358951  | -0.897073309 |
| B | -0.775530180 | -0.002793182 | 0.312296136  | H | -4.800587335 | 1.680584218  | -1.151034249 |
| C | 0.245781499  | -0.433839904 | 2.320737283  | C | -3.338032719 | 3.256957505  | -1.077488521 |
| C | 1.874189686  | 0.960366612  | 0.609823352  | H | -4.020655805 | 4.008994398  | -1.461679977 |
| C | 2.995656592  | 0.531612607  | -0.135256788 | C | -2.024979546 | 3.598944777  | -0.781508326 |
| C | 4.055729049  | 1.387612102  | -0.418270504 | C | -1.138372247 | 2.637280085  | -0.298905615 |
| H | 4.904705461  | 1.042874316  | -1.003023866 | H | -0.106819922 | 2.904551694  | -0.104636474 |
| C | 4.038994652  | 2.685408280  | 0.076717677  | C | -1.980782722 | -1.057811375 | 0.324343146  |
| H | 4.863940888  | 3.359636418  | -0.133492584 | C | -3.152637991 | -0.422763904 | -0.139125228 |
| C | 2.973484474  | 3.110774366  | 0.865420652  | C | -4.348592200 | -1.109833636 | -0.279895649 |
| C | 1.909017113  | 2.253020758  | 1.128641237  | H | -5.239788918 | -0.608804377 | -0.646750542 |
| H | 1.092765711  | 2.603198925  | 1.756740905  | C | -4.402588526 | -2.454489610 | 0.074878891  |
| C | 1.689406367  | -1.432904928 | 0.097334668  | H | -5.333744045 | -3.003742831 | -0.025225322 |
| C | 2.877654996  | -0.892209126 | -0.454537476 | C | -3.270766734 | -3.091522179 | 0.565774472  |
| C | 3.786627753  | -1.678485902 | -1.155458175 | C | -2.069571675 | -2.394824505 | 0.686813471  |
| H | 4.686343358  | -1.237177189 | -1.576624653 | H | -1.199905856 | -2.906526757 | 1.081501589  |
| C | 3.546826044  | -3.037545486 | -1.306384032 | H | 2.976986258  | 4.116013743  | 1.278263332  |
| H | 4.252715968  | -3.660653302 | -1.847411436 | H | 2.212191950  | -4.662077715 | -0.863685225 |
| C | 2.398562045  | -3.597091645 | -0.754517562 | H | -3.322354235 | -4.137045622 | 0.853546030  |
| C | 1.484831065  | -2.801044498 | -0.070361347 | H | -1.684300195 | 4.617519972  | -0.939902567 |
| H | 0.593059152  | -3.271048158 | 0.330681157  | H | 1.030426183  | -0.074730649 | 2.995503314  |
| C | -1.560958050 | 1.332784367  | -0.078880860 | H | 0.034362507  | -1.483476412 | 2.535623845  |
| C | -2.896216991 | 1.004016523  | -0.398310750 | H | -0.662640982 | 0.127121936  | 2.588834136  |

### TS3

Total energy = -1013.11106266 Hartree

Thermal correction to Gibbs free energy = 0.312907 Hartree

Imaginary frequencies: -686.9080

$d(B\cdots B) = 1.870943 \text{ \AA}$

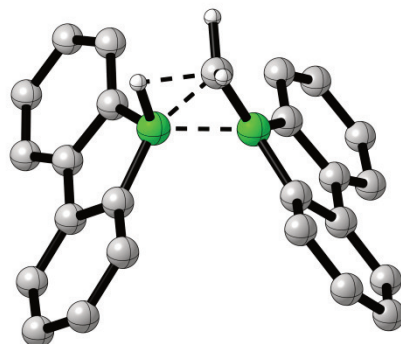

|   |              |              |              |   |              |              |              |
|---|--------------|--------------|--------------|---|--------------|--------------|--------------|
| B | -0.826974644 | -0.379670080 | 1.228647026  | C | 3.784888128  | -0.226617992 | -1.003987811 |
| B | 0.869216144  | 0.409290660  | 1.258752301  | H | 4.230023499  | 0.333176114  | -1.821752333 |
| C | -0.157148429 | -0.114867485 | 2.582327985  | C | 4.328632723  | -1.445853137 | -0.622780608 |
| C | -0.965290065 | -1.731926439 | 0.417308576  | H | 5.188900221  | -1.846492265 | -1.149976942 |
| C | -2.042357505 | -1.581665417 | -0.491538883 | C | 3.779169040  | -2.146749362 | 0.447696255  |
| C | -2.404303002 | -2.599518136 | -1.365977238 | C | 2.669867318  | -1.646951036 | 1.119489784  |
| H | -3.229868750 | -2.462057888 | -2.058960260 | H | 2.266831381  | -2.207054618 | 1.959087211  |
| C | -1.709414607 | -3.801646399 | -1.344806247 | C | 0.988181579  | 1.756957228  | 0.448424374  |
| H | -1.983469228 | -4.602010106 | -2.025389659 | C | 2.029657571  | 1.574882938  | -0.498024387 |
| C | -0.663071697 | -3.977452349 | -0.444706536 | C | 2.362267196  | 2.574069487  | -1.406538286 |
| C | -0.299580413 | -2.954788057 | 0.424598038  | H | 3.155354505  | 2.412855843  | -2.131468501 |
| H | 0.526696546  | -3.120090963 | 1.105019723  | C | 1.685920133  | 3.785148543  | -1.376667328 |
| C | -2.055296851 | 0.463478017  | 0.699342430  | H | 1.939119479  | 4.569248437  | -2.083455039 |
| C | -2.695691655 | -0.281274328 | -0.317942572 | C | 0.683037596  | 3.991357564  | -0.433094901 |
| C | -3.827604294 | 0.200651032  | -0.964542422 | C | 0.341034825  | 2.990101931  | 0.467032040  |
| H | -4.305769951 | -0.380983037 | -1.747854321 | H | -0.452893211 | 3.178158639  | 1.178980811  |
| C | -4.358244028 | 1.429677874  | -0.592313467 | H | -0.123188921 | -4.919745480 | -0.423527273 |
| H | -5.240791589 | 1.815294005  | -1.093564320 | H | -4.199025727 | 3.106225121  | 0.741663578  |
| C | -3.768061689 | 2.156902526  | 0.436830782  | H | 0.158448108  | 4.941896192  | -0.403778321 |
| C | -2.632045577 | 1.671539225  | 1.076458578  | H | 4.220118393  | -3.089863168 | 0.757103700  |
| H | -2.203706275 | 2.248228426  | 1.891928144  | H | 0.296781094  | -0.930817938 | 3.140689487  |
| C | 2.083264133  | -0.444663988 | 0.736224173  | H | -0.591123166 | 0.647772130  | 3.226706021  |
| C | 2.681965907  | 0.277821850  | -0.323149301 | H | 1.097698094  | 0.646473120  | 2.483573491  |

**TS4**

Total energy = -1013.13848805 Hartree

Thermal correction to Gibbs free energy = 0.315252 Hartree

Imaginary frequency: -13.9254

d(B...B) = 2.377687 Å

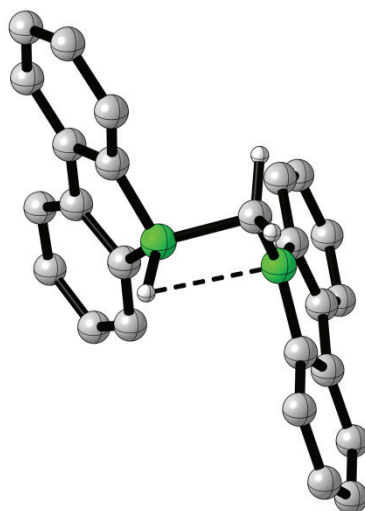

|   |              |              |              |   |              |              |              |
|---|--------------|--------------|--------------|---|--------------|--------------|--------------|
| B | 0.811745936  | -0.902545467 | 0.987350017  | H | 1.752775470  | -3.451981186 | -0.289694671 |
| B | -1.175652854 | -1.486649396 | -0.179897039 | C | -0.894963353 | -0.145091789 | -1.068926462 |
| H | -0.937211902 | -2.502153968 | -0.815830502 | C | -2.053751109 | 0.662679474  | -1.082973719 |
| C | -0.410181361 | -1.670897840 | 1.380829332  | C | -2.098699005 | 1.867963672  | -1.777571049 |
| H | -1.055042801 | -1.217090611 | 2.132823160  | H | -2.999488833 | 2.476136726  | -1.770903230 |
| H | -0.331423330 | -2.746245234 | 1.533257822  | C | -0.986840807 | 2.283674829  | -2.496277481 |
| C | 1.157455929  | 0.621601403  | 1.247840684  | H | -1.008191727 | 3.225106830  | -3.037196131 |
| C | 2.485494082  | 0.854878243  | 0.839306890  | C | 0.150162813  | 1.482753068  | -2.532913327 |
| C | 3.068593330  | 2.105406949  | 0.974083752  | C | 0.186994053  | 0.280071254  | -1.836200957 |
| H | 4.092336409  | 2.283603244  | 0.657703740  | H | 1.087305719  | -0.324700729 | -1.880691217 |
| C | 2.315247058  | 3.145887621  | 1.510538589  | C | -2.731563697 | -1.230527411 | 0.155223898  |
| H | 2.755962254  | 4.132914626  | 1.612344618  | C | -3.143019630 | 0.023731439  | -0.339680715 |
| C | 0.999829979  | 2.933394019  | 1.904957168  | C | -4.434162160 | 0.499566134  | -0.126427526 |
| C | 0.424581090  | 1.670902040  | 1.777855699  | H | -4.737371648 | 1.470341330  | -0.509632822 |
| H | -0.608412237 | 1.511909884  | 2.072434416  | C | -5.339895141 | -0.278768574 | 0.582599412  |
| C | 2.127009825  | -1.419594897 | 0.269059125  | H | -6.350014946 | 0.082025329  | 0.752875120  |
| C | 3.068579816  | -0.369587367 | 0.255784729  | C | -4.952087768 | -1.521712797 | 1.076797720  |
| C | 4.333600167  | -0.550836033 | -0.282208628 | C | -3.655921752 | -1.984513827 | 0.870238403  |
| H | 5.058431097  | 0.257929703  | -0.291859563 | H | -3.361865082 | -2.949753323 | 1.276012881  |
| C | 4.665836687  | -1.789282057 | -0.826134479 | H | 0.418887732  | 3.757922045  | 2.306110419  |
| H | 5.651197604  | -1.940691531 | -1.256401703 | H | 4.014270556  | -3.785812373 | -1.266419789 |
| C | 3.744534959  | -2.829392296 | -0.829330474 | H | -5.666057558 | -2.127725990 | 1.627985865  |
| C | 2.477676547  | -2.643507099 | -0.277250374 | H | 1.016384518  | 1.801450589  | -3.105504564 |

## 5. References

- S1 A. Hübner, M. Diefenbach, M. Bolte, H.-W. Lerner, M. C. Holthausen and M. Wagner, *Angew. Chem. Int. Ed.*, 2012, **51**, 12514-12518.
- S2 T. Kaese, H. Budy, M. Bolte, H.-W. Lerner and M. Wagner, *Angew. Chem. Int. Ed.*, 2017, **56**, 7546-7550.
- S3 A. Hübner, M. Bolte, H.-W. Lerner and M. Wagner, *Angew. Chem. Int. Ed.*, 2014, **53**, 10408-10411.
- S4 G. R. Fulmer, A. J. M. Miller, N. H. Sherden, H. E. Gottlieb, A. Nudelman, B. M. Stoltz, J. E. Bercaw and K. I. Goldberg, *Organometallics*, 2010, **29**, 2176-2179.
- S5 T. Kaese, A. Hübner, M. Bolte, H.-W. Lerner and M. Wagner, *J. Am. Chem. Soc.*, 2016, **138**, 6224-6233.
- S6 *X-Area: Diffractometer Control Program System*, Stoe & Cie, Darmstadt, Germany, 2002.
- S7 G. M. Sheldrick, *Acta Crystallogr., Sect. A: Found. Crystallogr.*, 2008, **64**, 112-122.
- S8 M. J. Frisch, G. W. Trucks, H. B. Schlegel, G. E. Scuseria, M. A. Robb, J. R. Cheeseman, G. Scalmani, V. Barone, B. Mennucci, G. A. Petersson, H. Nakatsuji, M. Caricato, X. Li, H. P. Hratchian, A. F. Izmaylov, J. Bloino, G. Zheng, J. L. Sonnenberg, M. Hada, M. Ehara, K. Toyota, R. Fukuda, J. Hasegawa, M. Ishida, T. Nakajima, Y. Honda, O. Kitao, H. Nakai, T. Vreven, J. A. Montgomery, Jr., J. E. Peralta, F. Ogliaro, M. Bearpark, J. J. Heyd, E. Brothers, K. N. Kudin, V. N. Staroverov, R. Kobayashi, J. Normand, K. Raghavachari, A. Rendell, J. C. Burant, S. S. Iyengar, J. Tomasi, M. Cossi, N. Rega, J. M. Millam, M. Klene, J. E. Knox, J. B. Cross, V. Bakken, C. Adamo, J. Jaramillo, R. Gomperts, R. E. Stratmann, O. Yazyev, A. J. Austin, R. Cammi, C. Pomelli, J. W. Ochterski, R. L. Martin, K. Morokuma, V. G. Zakrzewski, G. A. Voth, P. Salvador, J. J. Dannenberg, S. Dapprich, A. D. Daniels, Ö. Farkas, J. B. Foresman, J. V. Ortiz, J. Cioslowski and D. J. Fox, *Gaussian 09*, Revision D.01, Gaussian, Inc., Wallingford, CT, 2013; <http://www.gaussian.com>.
- S9 J. P. Perdew, K. Burke and M. Ernzerhof, *Phys. Rev. Lett.*, 1996, **77**, 3865-3868.
- S10 J. P. Perdew, K. Burke and M. Ernzerhof, *Phys. Rev. Lett.*, 1997, **78**, 1396-1396.
- S11 J. P. Perdew, M. Ernzerhof and K. Burke, *J. Chem. Phys.*, 1996, **105**, 9982-9985.
- S12 C. Adamo and V. Barone, *J. Chem. Phys.*, 1999, **110**, 6158-6170.
- S13 L. Goerigk and S. Grimme, *J. Chem. Theory Comput.*, 2011, **7**, 291-309.
- S14 S. Grimme, S. Ehrlich and L. Goerigk, *J. Comput. Chem.*, 2011, **32**, 1456-1465.
- S15 A. Schäfer, C. Huber and R. Ahlrichs, *J. Chem. Phys.*, 1994, **100**, 5829-5835.
- S16 A. V. Marenich, C. J. Cramer and D. G. Truhlar, *J. Phys. Chem. B*, 2009, **113**, 6378-6396.
- S17 C. Y. Legault, *CYLVIEW*, 1.0b; Université de Sherbrooke, Canada, 2009; <http://www.cylvview.org>.
